# Supplementary material for: Repressed hypoxia inducible factor‐1 in diabetes aggravates pulmonary aspergillus fumigatus infection through modulation of inflammatory responses
Source: PubMed Central journal article supplement (PMC7775987; doi:10.1002/ctm2.273), 2021-01-01
Supplement: CTM2-11-e273-s001.pdf [file CTM2-11-e273-s001.pdf]

Supplemental information for

**Repressed Hypoxia inducible factor-1 in diabetes aggravates pulmonary aspergillus fumigatus infection through modulation of inflammatory responses**

Yao Ye<sup>1,2</sup>, Yu Chen<sup>3</sup>, Jianjun Sun<sup>1</sup>, Hanyin Zhang<sup>1</sup>, Wenyang Li<sup>1</sup>, Wei Wang<sup>1#</sup>, Xiaowei Zheng<sup>4\*</sup>, Sergiu-Bogdan Catrina<sup>4,5,6\*</sup>

This document includes:

1. Detailed methods
2. Supplemental tables
3. Supplemental figures and figure legends
4. Gene lists

## **1. Detailed methods**

### **Clinical retrospective analysis**

Patients with fungal pneumonia, presenting at the First Hospital of China Medical University between March 2008 and July 2018, were identified by retrospectively reviewing medical records. The patients were categorized as with or without diabetes according to the 1999 WHO diabetes diagnostic criteria <sup>1</sup>. Patients with HIV infection, autoimmune hepatitis, autoimmune thyroiditis, idiopathic thrombocytopenia, systemic lupus erythematosus, drug-induced liver injury, or syphilis are enrolled in immune deficiency group. Patients were excluded if they had a malignant tumor. Age, sex, pathogen type, hospital stays, leukocyte counting and prognosis were extracted from each patient's medical records. This study was approved by the Ethical Review Board of the First Hospital of China Medical University

### **Fungal culture and growth conditions**

*Aspergillus fumigatus* strain ATCC46645 was used in all experiments, and was grown on Sabouraud Dextrose Agar (SDA) at 37 °C. Conidia were dislodged from plates with a cell scraper, re-suspended in normal saline, and filtered through sterile gauze.

### **Animals**

Male C57BL/6 mice (6 weeks old) were purchased from Liaoning Changsheng biotechnology co. LTD (Shenyang, China). Animals were housed in controlled temperature under 12/12h light/dark cycle, with standard chow and water *ad libitum*. All animal experiments were carried out in accordance with the National Institute of Health guide for the care and use of Laboratory animals, and experimental protocols were approved by the Institutional Animal Care and Use Committee of China Medical University.

### **Murine models of STZ-induced diabetes and pulmonary aspergillosis model**

Diabetes was induced by a single dose intraperitoneal injection of streptozotocin (STZ, 180 mg / Kg, Sigma, USA) after a 12 hrs. fasting period<sup>2,3</sup>. In the subsequent days, blood was obtained by puncturing the tail vein, and blood glucose levels were checked with a glucometer (Accu-chek Performa, Roche, Switzerland). The diabetic state was confirmed after two sequential blood glucose measurements above 16.7 mmol / L one week after STZ injection. The mice were maintained in a diabetic state for one week prior to *A. fumigatus* inoculation. For infection, mice were lightly anesthetized and immobilized in an upright position using rubber bands attached to a cardboard for oropharyngeal aspiration. A blunt 24G needle attached to a 1ml syringe was advanced into the trachea to deliver  $5 \times 10^8$  conidia in a volume of 0.05 ml saline.

### **DMOG treatment**

Diabetic mice were randomized into two treatment groups: one group received dimethylxalylglycine (DMOG) *i.p.* (300mg / Kg in PBS, Frontier Scientific, cat #: D1070, USA) every second day during the study period starting one week before infection. The diabetic control group was injected with the same volume of PBS at the same intervals.

### **FG-4592 treatment**

Diabetic mice were randomized into two treatment groups: one group received FG-4592 *i.p.* (20mg / Kg, dissolved in DMSO and further diluted with PBS, Selleck Chemicals, cat #: S1007, USA) every second day during the study period starting one week before infection. The diabetic control group was injected with the same volume of vehicle at the same intervals.

### **Analysis of *A. fumigatus* infection in mice**

To analyze *A. fumigatus* infection, the mice were sacrificed on day 1, 2, 3, 4, 7 and 14 post inoculation, and the left lung of each mouse was harvested and fixed in formaldehyde solution. The paraffin-embedded tissues were sliced with a rotary microtome (LEICA RM2245) for 4 µm thickness, then mounted on glass slides. After the procedures of dehydration, the sections were stained with hematoxylin and eosin (H & E) and observed using Zeiss Axioscope 2-plus microscope. Lung specimens were scored by two blinded investigators for the intensity of leukocyte infiltration. Semi-quantitative numeric values were assigned for these scores according to the scale: 0, no infiltrates; 1, little; 2, moderately large; and 3, large infiltrates<sup>4</sup>.

To assess the fungal burden in lungs, the left lung sections were stained with a rabbit polyclonal antibody to *Aspergillus* (1:100, Abcam, cat #: ab20419, UK) at 4 °C overnight followed by washing 3 times with PBS for 5 min each. The sections were then incubated with AlexaFluor488-conjugated goat anti-rabbit IgG (1:100, Zsbio, cat #: ZF-0511, China) at room temperature for 1h. After washing 3 times with PBS for 5 minutes each, prolong Gold antifade reagent with DAPI (Solarbio, cat #: S2110, China) was added to each section. Microscopic examinations were performed on a Zeiss Axioscope 2-plus microscope and imaging system (Zeiss, Jena, Germany). Quantification of *A. fumigatus* was performed using Image-Pro Plus (U.S. Media Cybernetics, Silver spring, MD, USA) and integrated optical density (IOD) was measured.

In Colony Forming Unit (CFU) assays, the right upper lobe was harvested and homogenized with glass beads on a Mini- Bead beater (Service bio, KZ-II, China), and serially diluted onto SDA plates in duplicate, and CFU was determined after 24 hours.

### **Analysis of hypoxia level in mice**

To analyze hypoxia level in lung tissue, Hypoxyprobe (60mg / Kg in PBS, Natural Pharmacia International, Inc., cat #: HP3-100Kit, USA) was injected intraperitoneally 2 hours before sacrifice. The mice were sacrificed on day 1 and day 3 post inoculation, and the left lung of each mouse was harvested and fixed in formaldehyde solution. The paraffin-embedded tissues were sliced with a rotary microtome (LEICA RM2245) for 4  $\mu$ m thickness, then mounted on glass slides. After dewaxing and hydration, the left lung sections were blocked by animal non-immune serum and then stained with a rabbit anti-pimonidazole antibody (1:100, Natural Pharmacia International, Inc., cat #: PAb2627AP, USA) at 4 °C overnight followed by washing 3 times with PBS for 5 min each. The sections were then incubated with HRP-conjugated goat anti-rabbit IgG (1:100, MX biotechnologies, cat #: KIT-7710, China) at room temperature for 1h. After washing 3 times with PBS for 5 minutes each, DAB (Zsbio, cat #: ZLI-9018, China) was added to each section for 10 minutes. One minute after hematoxylin counterstaining, the sections were dehydrated, fixed and mounted. Microscopic examinations were performed on a Zeiss Axioscope 2-plus microscope and imaging system (Zeiss, Jena, Germany). Quantification of *A. fumigatus* was performed using Image-Pro Plus (U.S. Media Cybernetics, Silver spring, MD, USA) and integrated optical density (IOD) was measured.

### **Cytokine analysis**

Selected cytokine levels in the serum were analyzed using Meso Scale Discovery (Gaithersburg, MD, USA) mouse Cytokine Assay (detecting IL-2, IL-4, IL-6, IL-10, IL-12p70, IL-17A, IL-22, MIP-3 $\alpha$  and TNF- $\alpha$ ) and measured using the QuickPlex SQ120 according to the manufacture's instruction.

### **Protein extraction and western blotting analysis**

Lung tissues were homogenized in RIPA Lysis buffer at 4°C to obtain whole tissue lysate. The lysates were then cleared by centrifugation for 30 min at 20,000 g at 4°C and the protein concentration was determined using bicinchoninic acid method (ThermoFisher, cat #: 23227, USA). Fifty µg protein samples were separated by SDS-PAGE and transferred to PVDF membranes (Bio-Rad). After blocking in 5% non-fat milk in Tris-buffered saline (TBS) buffer [50 mM Tris (pH 7.4), 150 mM NaCl] supplemented with 0.1% Tween 20 (TBS-T) for 1.5 hours, the membranes were incubated with anti-HIF-1 $\alpha$  (1:1000, Novus Bio, cat #: NB100-479, USA) or anti- $\beta$ -actin (1:1000, Zsbio, cat #: TA-09, China) antibodies in blocking buffer. After several washes with TBS-T, the membranes were incubated with anti-rabbit or anti-mouse IgG-horseradish peroxidase conjugate (1:5000, Zsbio, cat #: ZB-2301, cat #: ZB-2305, China) in TBS buffer. After several washes, HIF-1 $\alpha$  and  $\beta$ -actin were visualized using an enhanced chemiluminescence reagent (Bio-Rad, cat #: 1705062, France). Immunoreactive bands were photographed using a Gel-Pro-Analyzer (DNR Bio, MicroChemi 4.2, Israel) and quantified using Image J. Relative band density for HIF-1 $\alpha$  was normalized to  $\beta$ -actin.

### **RNA sequencing and RNA-Seq data analysis**

RNA from lung tissues of three mice in each group were stabilized with RNALater reagent (ThermoFisher Scientific) and extracted using RNeasy Mini Kit (Qiagen) according to the manufacturer's instructions. RNA integrity was assessed using the RNA Nano 6000 Assay Kit of the Bioanalyzer 2100 system (Agilent Technologies, CA, USA). Sequencing libraries were generated using NEBNext® Ultra™ RNA Library Prep Kit for Illumina® (NEB, USA). The featureCounts v1.5.0-p3 was used to count the reads numbers mapped to each gene. The *P* values were adjusted using the Benjamin & Hochberg method. Corrected *P*-value of 0.01 and absolute log<sub>2</sub> of fold change of 2 were set as the threshold for significantly differential expression.

## Statistical analysis

All data were expressed as the mean  $\pm$  standard error of mean and analyzed with GraphPad Prism 5.0 software (San Diego, CA, USA). Chi-square test, Student's t-test and Fisher's exact test were used to analyze the clinical data. And multivariate logistic regression was used to further confirm the risk factors. Multiple-group comparisons were analyzed using one-way or two-way ANOVA followed by multiple comparisons post-test testing. Unpaired Student's t-test was used for the comparison between two groups. Survival curves were analyzed with Mantel-Cox log-rank tests.  $P < 0.05$  was considered statistically significant.

1. Gabir MM, Hanson RL, Dabelea D, et al. The 1997 American Diabetes Association and 1999 World Health Organization criteria for hyperglycemia in the diagnosis and prediction of diabetes. *Diabetes Care*. 2000; 23(8): 1108-12.
2. De Carvalho AK, Da Silva S, Serafini E, et al. Prior Exercise Training Prevent Hyperglycemia in STZ Mice by Increasing Hepatic Glycogen and Mitochondrial Function on Skeletal Muscle. *J Cell Biochem*. 2017; 118(4): 678-85.
3. Erener S, Mojibian M, Fox JK, Denroche HC, Kieffer TJ. Circulating miR-375 as a biomarker of beta-cell death and diabetes in mice. *Endocrinology*. 2013; 154(2): 603-8.
4. Mirkov I, El-Muzghi AA, Djokic J, et al. Pulmonary immune responses to *Aspergillus fumigatus* in rats. *Biomed Environ Sci*. 2014; 27(9): 684-94.

## 2. Supplemental tables

**Table S1. Univariate analysis of risk factors for the length of hospital stay.**

| Factor                     | Short (n = 47)    | Long (n = 43)     | P value            |
|----------------------------|-------------------|-------------------|--------------------|
| Age (Mean $\pm$ SEM years) | 51.62 $\pm$ 2.089 | 54.28 $\pm$ 2.008 | 0.294*             |
| Diabetes status            |                   |                   | 0.039 <sup>†</sup> |
| Yes                        | 14 (38.9)         | 22 (61.1)         |                    |
| No                         | 33 (61.1)         | 21 (38.9)         |                    |
| Thoracic surgery history   |                   |                   | 0.252 <sup>‡</sup> |
| Yes                        | 2 (28.6)          | 5 (71.4)          |                    |
| No                         | 45 (54.2)         | 38 (45.8)         |                    |
| Immune deficiency          |                   |                   | 0.022 <sup>†</sup> |
| Yes                        | 12 (36.4)         | 21 (63.6)         |                    |
| No                         | 35 (61.4)         | 22 (38.6)         |                    |
| Kidney disease             |                   |                   | 1.000 <sup>‡</sup> |
| Yes                        | 3 (50)            | 3 (50)            |                    |
| No                         | 44 (52.4)         | 40 (47.6)         |                    |

< 20 days of stay in hospital was defined as a short-term stay and  $\geq$  20 days of stay was defined as a long-term stay. The data are presented as number (%).

\* Student's t test, <sup>†</sup> Chi-square test, <sup>‡</sup> Fisher's exact test



**Table S2. The multivariate logistic regression analysis.**

| Variable          | B value | OR (95% Confidence Interval) | P value |
|-------------------|---------|------------------------------|---------|
| Diabetes status   | 1.038   | 2.823 (1.136-7.014)          | 0.025   |
| Immune deficiency | 1.149   | 3.156 (1.2748-7.985)         | 0.015   |

### 3. Supplemental figures and figure legends

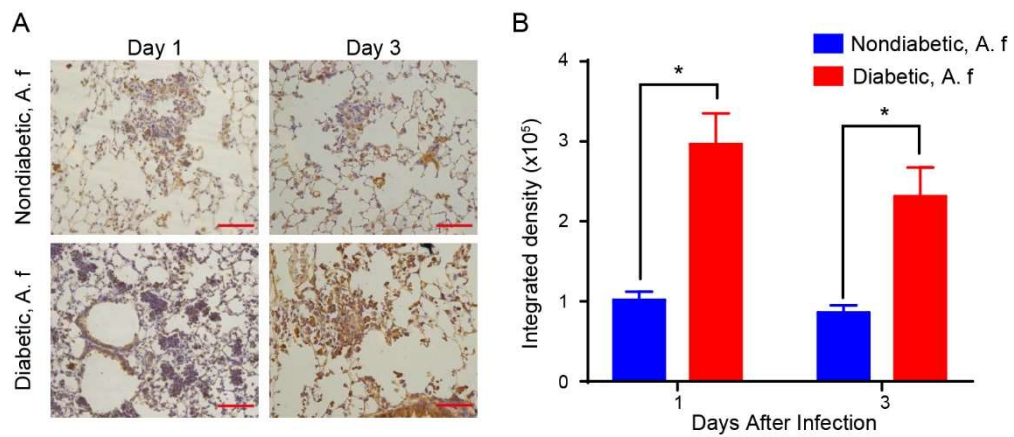

**Figure S1. Lung tissues in diabetic mice are more hypoxic than nondiabetic mice after pulmonary *A. fumigatus* infection.** Diabetic or nondiabetic mice were received  $5 \times 10^8$  *A. fumigatus* conidia (*A. f.*) intratracheally. Hypoxyprobe was injected intraperitoneally 2 hours before sacrifice. A, Representative images of immunohistochemical staining of Hypoxyprobe in lung sections on indicated days post inoculation. Scale bars = 100 $\mu$ m. B, Quantification of the immunohistochemical staining intensity of Hypoxyprobe (n = 5). Data are presented as mean  $\pm$  SEM. \*,  $P < 0.05$  analyzed using Two-way ANOVA followed by multiple comparisons test.

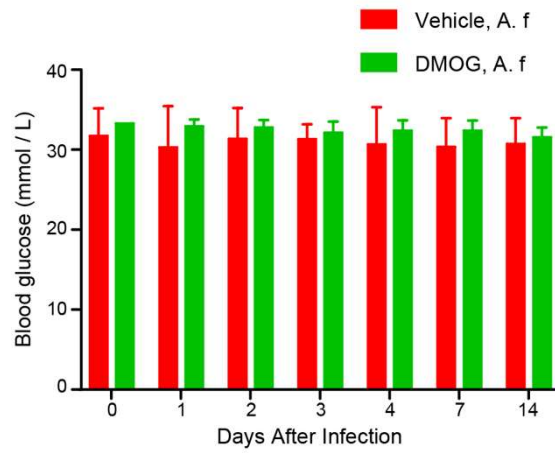

**Figure S2.** Diabetic mice were administered DMOG (300 mg/Kg, *i.p.*) or vehicle every other day one week before and two weeks after *A. fumigatus* infection (*A. f.*). Blood glucose was measured on the indicated days before (Day 0) and after the inoculation (n=5).

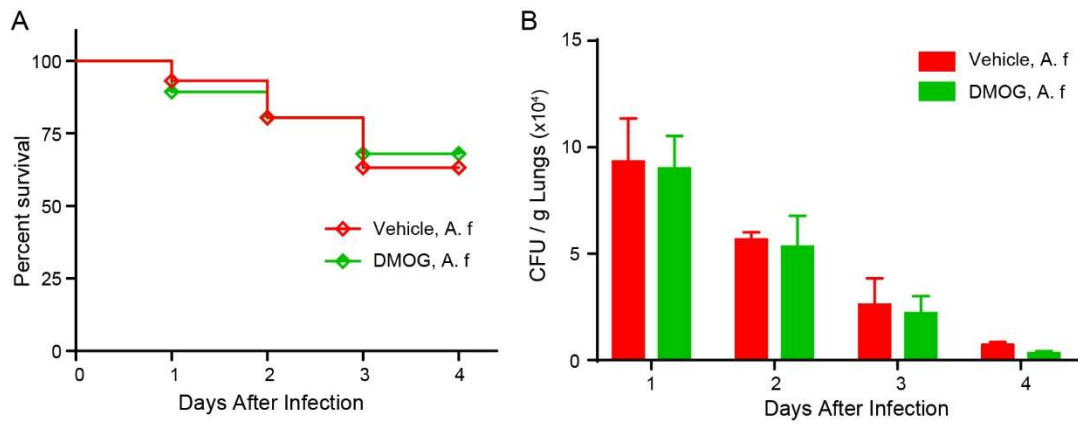

**Figure S3.** Diabetic mice were injected with DMOG (300 mg / Kg, *i.p.*) or vehicle every other day for 4 days after inoculation of  $5 \times 10^8$  *A. fumigatus* conidia *i.t.* (A. f). A, Survival rate of the mice (n = 5, Log-Rank Test). B, Colony forming unit (CFU) counts per gram of lung tissue on indicated days post *A. fumigatus* challenge (n = 3 - 5).

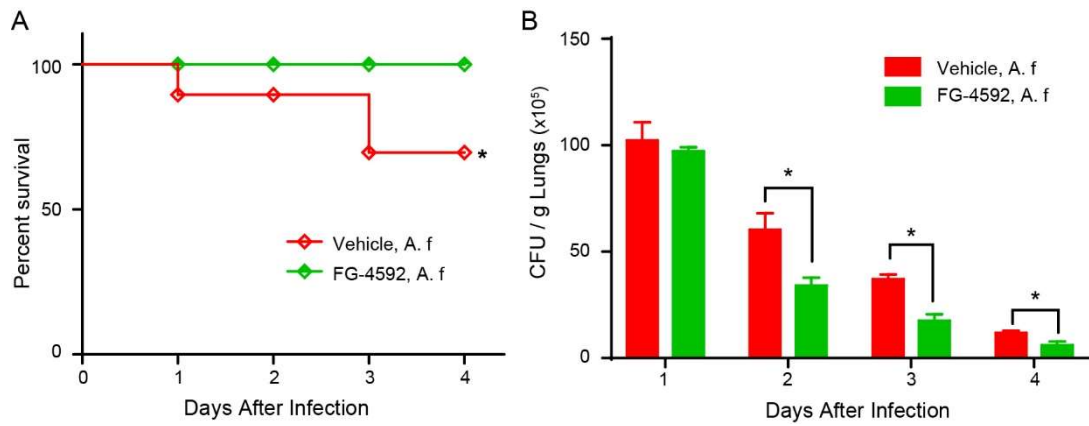

**Figure S4.** Diabetic mice were injected with FG-4592 (20 mg / Kg, *i.p.*) or vehicle every other day for one week before and 4 days after inoculation of  $5 \times 10^8$  *A. fumigatus* conidia *i.t.* (A. f). A, Survival rate of the mice (n = 5, Log-Rank Test). B, Colony forming unit (CFU) counts per gram of lung tissue on indicated days post *A. fumigatus* challenge (n = 3 - 5). \*,  $P < 0.05$  analyzed using unpaired Student's t-test.

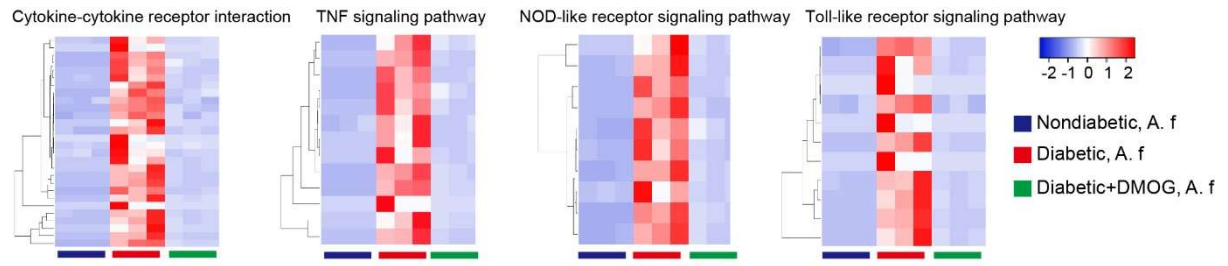

**Figure S5.** Heatmap diagrams showing the relative expression of genes in inflammation-related pathways analyzed by KEGG pathway analysis in Figure 2N.

**List 1. Differentially Expressed Genes between Diabetic, A. f vs Nondiabetic A. f**

| gene_id            | gene_name     | padj (diabetic vs nondiabetic) | Fold-Change (diabetic vs nondiabetic) |
|--------------------|---------------|--------------------------------|---------------------------------------|
| ENSMUSG00000000031 | H19           | 0.009985938                    | 0.166051202                           |
| ENSMUSG00000000182 | Fgf23         | 0.004779587                    | 12.47971149                           |
| ENSMUSG00000000204 | Slfn4         | 1.30E-11                       | 43.93092057                           |
| ENSMUSG00000000290 | Itgb2         | 4.06E-73                       | 8.464829477                           |
| ENSMUSG00000000325 | Arvcf         | 7.92E-27                       | 0.220752352                           |
| ENSMUSG00000000385 | Tmprss2       | 1.05E-16                       | 0.240911563                           |
| ENSMUSG00000000416 | Cttnbp2       | 8.31E-06                       | 0.228819355                           |
| ENSMUSG00000000562 | Adora3        | 1.49E-08                       | 7.342768511                           |
| ENSMUSG00000000682 | Cd52          | 1.10E-36                       | 5.755010684                           |
| ENSMUSG00000000730 | Dnmt3l        | 1.98E-06                       | 7.504836014                           |
| ENSMUSG00000000791 | Ill12rb1      | 1.59E-05                       | 5.901630852                           |
| ENSMUSG00000000903 | Vpreb3        | 1.92E-30                       | 0.11639807                            |
| ENSMUSG00000000957 | Mmp14         | 4.16E-43                       | 6.205516112                           |
| ENSMUSG00000000982 | Ccl3          | 4.29E-31                       | 265.3431412                           |
| ENSMUSG00000000983 | Wfdc18        | 3.26E-05                       | 98.1432878                            |
| ENSMUSG00000001020 | S100a4        | 2.45E-05                       | 5.583769409                           |
| ENSMUSG00000001095 | Slc13a2       | 0.000731503                    | 4.30924016                            |
| ENSMUSG00000001131 | Timp1         | 7.10E-191                      | 81.05246061                           |
| ENSMUSG00000001156 | Mxd1          | 1.21E-62                       | 10.66813084                           |
| ENSMUSG00000001473 | Tubb6         | 2.86E-28                       | 6.307117614                           |
| ENSMUSG00000001750 | Tcirl1        | 9.09E-42                       | 4.909169914                           |
| ENSMUSG00000001865 | Cpa3          | 1.38E-05                       | 0.194535534                           |
| ENSMUSG00000002068 | Cene1         | 4.42E-06                       | 4.650078463                           |
| ENSMUSG00000002111 | Spi1          | 1.41E-40                       | 6.269785944                           |
| ENSMUSG00000002500 | Rpl3l         | 0.003958367                    | 4.258420833                           |
| ENSMUSG00000002588 | Pon1          | 2.06E-68                       | 0.060837085                           |
| ENSMUSG00000002699 | Lcp2          | 9.22E-61                       | 9.603575349                           |
| ENSMUSG00000002769 | Gnmt          | 1.36E-10                       | 0.228651683                           |
| ENSMUSG00000002847 | Pla1a         | 7.36E-26                       | 12.12357924                           |
| ENSMUSG00000002897 | Ill17ra       | 7.70E-23                       | 4.738156183                           |
| ENSMUSG00000002983 | Relb          | 1.17E-23                       | 4.438367271                           |
| ENSMUSG00000003206 | Ebi3          | 1.48E-17                       | 7.508933932                           |
| ENSMUSG00000003283 | Hck           | 4.00E-37                       | 4.294020581                           |
| ENSMUSG00000003477 | Inmt          | 3.55E-25                       | 0.101976957                           |
| ENSMUSG00000003484 | Cyp4f18       | 1.83E-35                       | 12.42602525                           |
| ENSMUSG00000003665 | Has1          | 2.91E-07                       | 5.62813515                            |
| ENSMUSG00000003882 | Il7r          | 6.05E-21                       | 4.407130743                           |
| ENSMUSG00000004035 | Gstm7         | 8.48E-06                       | 0.249433326                           |
| ENSMUSG00000004207 | Psap          | 9.86E-27                       | 4.719770322                           |
| ENSMUSG00000004266 | Ptpn6         | 1.07E-34                       | 4.156881642                           |
| ENSMUSG00000004359 | Spic          | 1.56E-06                       | 10.7066703                            |
| ENSMUSG00000004360 | 9330159F19Rik | 0.000116018                    | 0.17731175                            |
| ENSMUSG00000004371 | Il11          | 6.16E-05                       | 5.439592966                           |
| ENSMUSG00000004446 | Bid           | 1.70E-25                       | 4.519732574                           |
| ENSMUSG00000004609 | Cd33          | 9.45E-28                       | 9.872349374                           |
| ENSMUSG00000004709 | Cd244a        | 1.73E-17                       | 4.011156956                           |
| ENSMUSG00000004791 | Pgf           | 2.51E-10                       | 4.252290435                           |
| ENSMUSG00000004814 | Ccl24         | 4.61E-09                       | 7.520270475                           |
| ENSMUSG00000004892 | Bcan          | 4.29E-07                       | 0.011564909                           |
| ENSMUSG00000005054 | Cstb          | 3.13E-41                       | 12.00865313                           |
| ENSMUSG00000005057 | Sh2b2         | 1.11E-44                       | 27.24464566                           |
| ENSMUSG00000005087 | Cd44          | 6.64E-30                       | 5.30505969                            |
| ENSMUSG00000005320 | Fgfr4         | 8.73E-11                       | 0.154631943                           |
| ENSMUSG00000005373 | Mxipl         | 0.000313744                    | 0.170763541                           |
| ENSMUSG00000005413 | Hmox1         | 1.72E-37                       | 27.80655712                           |
| ENSMUSG00000005540 | Fcer2a        | 1.64E-10                       | 4.76454107                            |
| ENSMUSG00000005547 | Cyp2a5        | 2.18E-08                       | 0.067534238                           |
| ENSMUSG00000005667 | Mthfd2        | 9.84E-15                       | 5.00731423                            |
| ENSMUSG00000005800 | Mmp8          | 4.20E-08                       | 35.91504923                           |
| ENSMUSG00000005824 | Tnfrsf14      | 1.92E-17                       | 5.56618945                            |
| ENSMUSG00000006014 | Prg4          | 0.00222033                     | 19.04858442                           |
| ENSMUSG00000006056 | Calcoco2      | 0.000982471                    | 0.08538581                            |
| ENSMUSG00000006269 | Atp6v1b1      | 3.13E-14                       | 0.028232776                           |

## List 1 continued

|                    |               |             |             |
|--------------------|---------------|-------------|-------------|
| ENSMUSG00000006369 | Fbln1         | 0.005678012 | 0.238458711 |
| ENSMUSG00000006403 | Adams4        | 3.38E-69    | 65.687058   |
| ENSMUSG00000006462 | A530013C23Rik | 0.000524231 | 4.219720376 |
| ENSMUSG00000006519 | Cyba          | 8.46E-24    | 5.163292224 |
| ENSMUSG00000006567 | Atp7b         | 3.30E-10    | 0.246868054 |
| ENSMUSG00000006711 | D130043K22Rik | 0.000195496 | 0.20162569  |
| ENSMUSG00000006724 | Cyp27b1       | 0.000816855 | 18.41560312 |
| ENSMUSG00000006784 | Ttc25         | 1.63E-09    | 0.232658721 |
| ENSMUSG00000006818 | Sod2          | 3.51E-45    | 6.767083094 |
| ENSMUSG00000007279 | Scube2        | 1.92E-30    | 0.119835292 |
| ENSMUSG00000007682 | Dio2          | 0.000412997 | 5.633610651 |
| ENSMUSG00000007946 | Phox2a        | 1.34E-08    | 117.5994875 |
| ENSMUSG00000009185 | Ccl8          | 9.22E-15    | 9.146331154 |
| ENSMUSG00000009214 | Mymk          | 9.90E-05    | 21.64461411 |
| ENSMUSG00000009292 | Trpm2         | 1.64E-12    | 7.720871175 |
| ENSMUSG00000009900 | Wnt3a         | 3.73E-13    | 0.211859404 |
| ENSMUSG00000010362 | Rdm1          | 1.62E-21    | 0.221062308 |
| ENSMUSG00000010651 | Acaa1b        | 6.47E-16    | 0.084690655 |
| ENSMUSG00000011008 | Mcoln2        | 1.87E-27    | 9.748604827 |
| ENSMUSG00000011148 | Adssl1        | 2.72E-11    | 5.299598173 |
| ENSMUSG00000011154 | Cfap161       | 1.03E-08    | 0.218652689 |
| ENSMUSG00000012123 | Crybg2        | 2.41E-10    | 0.22626291  |
| ENSMUSG00000012428 | Steap4        | 8.00E-101   | 13.27824274 |
| ENSMUSG00000012519 | Mkl1          | 4.40E-10    | 6.320771184 |
| ENSMUSG00000012819 | Cdh23         | 7.00E-07    | 4.725085388 |
| ENSMUSG00000013353 | 4931406B18Rik | 0.000283408 | 75.35631904 |
| ENSMUSG00000013974 | Mcomp1        | 8.66E-20    | 5.276533117 |
| ENSMUSG00000014543 | Klra17        | 8.04E-08    | 6.423532032 |
| ENSMUSG00000014599 | Csf1          | 7.83E-25    | 4.43570653  |
| ENSMUSG00000014686 | Ceacam16      | 1.02E-07    | 17.29267118 |
| ENSMUSG00000014782 | Plekhg4       | 8.67E-05    | 8.257345956 |
| ENSMUSG00000014846 | Tppp3         | 3.09E-29    | 0.198043419 |
| ENSMUSG00000015312 | Gadd45b       | 1.37E-23    | 4.964339948 |
| ENSMUSG00000015340 | Cybb          | 4.28E-51    | 8.788551854 |
| ENSMUSG00000015354 | Pcolce2       | 3.01E-32    | 0.089416776 |
| ENSMUSG00000015437 | Gzmb          | 1.44E-07    | 4.016502225 |
| ENSMUSG00000015854 | Cd51          | 0.000121159 | 7.099058027 |
| ENSMUSG00000015947 | Fcgr1         | 2.92E-18    | 11.01258122 |
| ENSMUSG00000015950 | Ncf1          | 2.32E-41    | 5.966288257 |
| ENSMUSG00000016256 | Ctsz          | 1.45E-37    | 5.39162304  |
| ENSMUSG00000016283 | H2-M2         | 4.28E-08    | 5.070271416 |
| ENSMUSG00000016349 | Eef1a2        | 1.35E-06    | 0.119978207 |
| ENSMUSG00000016386 | Mpped2        | 3.44E-08    | 0.188975857 |
| ENSMUSG00000016496 | Cd274         | 5.61E-39    | 22.42449759 |
| ENSMUSG00000016498 | Pdcd11g2      | 6.35E-29    | 18.76584784 |
| ENSMUSG00000016529 | Ili10         | 3.91E-08    | 129.1821376 |
| ENSMUSG00000017002 | Slpi          | 1.12E-29    | 19.92518516 |
| ENSMUSG00000017344 | Vtn           | 3.91E-07    | 0.245586803 |
| ENSMUSG00000017491 | Rarb          | 7.51E-08    | 0.227911966 |
| ENSMUSG00000017631 | Abr           | 2.44E-31    | 4.512234305 |
| ENSMUSG00000017724 | Etv4          | 0.000225987 | 5.098649584 |
| ENSMUSG00000017737 | Mmp9          | 7.05E-16    | 5.762675061 |
| ENSMUSG00000017754 | Pltp          | 5.18E-26    | 0.178304028 |
| ENSMUSG00000017830 | Dhx58         | 0.003877223 | 4.779023423 |
| ENSMUSG00000017868 | Sgk2          | 0.006199747 | 29.77022893 |
| ENSMUSG00000018411 | Mapt          | 3.60E-24    | 0.170278542 |
| ENSMUSG00000018451 | 6330403K07Rik | 7.52E-05    | 0.209660629 |
| ENSMUSG00000018566 | Slc2a4        | 0.001453651 | 0.24170566  |
| ENSMUSG00000018581 | Dnah11        | 3.04E-07    | 0.23979687  |
| ENSMUSG00000018774 | Cd68          | 2.41E-38    | 10.30849311 |
| ENSMUSG00000018776 | Slc35g3       | 0.007034365 | 0.160870532 |
| ENSMUSG00000018868 | Pnpla5        | 0.000519359 | 0.017163999 |
| ENSMUSG00000018893 | Mb            | 3.28E-06    | 0.015254189 |
| ENSMUSG00000018919 | Tm4sf5        | 0.00641202  | 4.032851041 |



## List 1 continued

|                    |           |             |             |
|--------------------|-----------|-------------|-------------|
| ENSMUSG00000018930 | Ccl4      | 5.00E-96    | 230.4394182 |
| ENSMUSG00000019102 | Aldh3a1   | 6.97E-14    | 0.174625088 |
| ENSMUSG00000019122 | Ccl9      | 3.58E-31    | 16.43637671 |
| ENSMUSG00000019278 | Dpep1     | 3.06E-14    | 0.22528013  |
| ENSMUSG00000019368 | Sec14l4   | 6.38E-22    | 0.24029631  |
| ENSMUSG00000019762 | Iyd       | 7.28E-06    | 0.179380683 |
| ENSMUSG00000019832 | Rab32     | 1.13E-42    | 9.735635149 |
| ENSMUSG00000019850 | Tnfr3     | 1.05E-63    | 15.09667011 |
| ENSMUSG00000019874 | Fabp7     | 1.33E-06    | 84.56179976 |
| ENSMUSG00000019894 | Slc6a15   | 5.48E-08    | 0.150318285 |
| ENSMUSG00000019905 | Gprc6a    | 4.08E-05    | 0.242027467 |
| ENSMUSG00000019987 | Arg1      | 1.22E-79    | 83.63839739 |
| ENSMUSG00000019992 | Mtfr2     | 5.25E-05    | 7.255974152 |
| ENSMUSG00000020052 | Ascl1     | 0.00037487  | 0.048672778 |
| ENSMUSG00000020062 | Slc5a8    | 0.000228152 | 0.089717756 |
| ENSMUSG00000020077 | Srgn      | 1.13E-16    | 6.216188148 |
| ENSMUSG00000020096 | Tbata     | 8.81E-07    | 0.076197917 |
| ENSMUSG00000020097 | Sgpl1     | 3.40E-28    | 4.681421059 |
| ENSMUSG00000020120 | Plek      | 1.29E-51    | 12.49153863 |
| ENSMUSG00000020178 | Adora2a   | 1.43E-27    | 5.248777831 |
| ENSMUSG00000020182 | Ddc       | 2.07E-07    | 0.173299449 |
| ENSMUSG00000020218 | Wif1      | 5.98E-09    | 0.11821602  |
| ENSMUSG00000020227 | Irak3     | 5.06E-29    | 10.07713264 |
| ENSMUSG00000020251 | Glt8d2    | 3.12E-13    | 0.106555363 |
| ENSMUSG00000020256 | Aldh1l2   | 0.000298675 | 4.053976345 |
| ENSMUSG00000020334 | Slc22a4   | 8.65E-23    | 24.49985099 |
| ENSMUSG00000020377 | Ltc4s     | 3.27E-06    | 0.243480882 |
| ENSMUSG00000020399 | Havcr2    | 7.21E-25    | 6.510698191 |
| ENSMUSG00000020400 | Tnfr1     | 2.67E-35    | 7.063104332 |
| ENSMUSG00000020407 | Upp1      | 8.26E-27    | 8.082492153 |
| ENSMUSG00000020431 | Adcy1     | 5.61E-10    | 0.04346502  |
| ENSMUSG00000020524 | Gria1     | 4.46E-09    | 0.169055063 |
| ENSMUSG00000020572 | Nampt     | 5.28E-14    | 4.559727737 |
| ENSMUSG00000020620 | Abca8b    | 1.77E-13    | 0.192922147 |
| ENSMUSG00000020641 | Rsad2     | 1.21E-06    | 32.12861469 |
| ENSMUSG00000020644 | Id2       | 3.10E-12    | 4.424399797 |
| ENSMUSG00000020651 | Slc26a4   | 4.54E-25    | 11.88032379 |
| ENSMUSG00000020682 | Mmp28     | 5.18E-29    | 0.185220715 |
| ENSMUSG00000020684 | Ras110b   | 2.04E-19    | 9.742132293 |
| ENSMUSG00000020826 | Nos2      | 6.25E-68    | 61.91897814 |
| ENSMUSG00000020836 | Coro6     | 0.000247216 | 0.221148453 |
| ENSMUSG00000020884 | Asgr1     | 1.31E-09    | 0.062823191 |
| ENSMUSG00000020901 | Pik3r5    | 9.82E-30    | 4.902511961 |
| ENSMUSG00000020990 | Cdk11     | 1.75E-05    | 0.204908478 |
| ENSMUSG00000021025 | Nfkbia    | 2.22E-14    | 4.394033255 |
| ENSMUSG00000021055 | Esr2      | 6.34E-07    | 0.179905474 |
| ENSMUSG00000021091 | Serpina3n | 1.87E-71    | 11.30976395 |
| ENSMUSG00000021109 | Hif1a     | 7.51E-31    | 5.387660216 |
| ENSMUSG00000021123 | Rdh12     | 0.000277941 | 12.04586106 |
| ENSMUSG00000021125 | Arg2      | 6.08E-27    | 13.57852688 |
| ENSMUSG00000021186 | Fbln5     | 2.21E-16    | 0.246541182 |
| ENSMUSG00000021198 | Unc79     | 2.16E-06    | 0.130085172 |
| ENSMUSG00000021278 | Amn       | 0.003383318 | 15.4400543  |
| ENSMUSG00000021281 | Tnfr2     | 1.05E-79    | 13.25759319 |
| ENSMUSG00000021298 | Gpr132    | 4.83E-39    | 6.614284702 |
| ENSMUSG00000021322 | Aoah      | 6.94E-48    | 26.02086521 |
| ENSMUSG00000021379 | Id4       | 5.77E-11    | 0.230437199 |
| ENSMUSG00000021390 | Ogn       | 9.90E-19    | 0.178510813 |
| ENSMUSG00000021403 | Serpnb9b  | 1.20E-07    | 5.633035629 |
| ENSMUSG00000021451 | Sema4d    | 7.61E-55    | 12.43225978 |
| ENSMUSG00000021456 | Fbp2      | 1.03E-05    | 10.54660916 |
| ENSMUSG00000021457 | Syk       | 3.23E-28    | 6.099266392 |
| ENSMUSG00000021567 | Nkd2      | 4.58E-19    | 0.183467959 |
| ENSMUSG00000021573 | Tppp      | 3.90E-14    | 0.157302375 |

## List 1 continued

|                    |          |             |             |
|--------------------|----------|-------------|-------------|
| ENSMUSG00000021591 | Glrx     | 3.15E-23    | 7.042394205 |
| ENSMUSG00000021614 | Vcan     | 7.01E-35    | 14.31597978 |
| ENSMUSG00000021640 | Naip1    | 7.62E-07    | 11.18106126 |
| ENSMUSG00000021684 | Pde8b    | 3.12E-22    | 0.196812251 |
| ENSMUSG00000021708 | Rasgrf2  | 5.46E-11    | 0.210608445 |
| ENSMUSG00000021765 | Fst      | 5.49E-07    | 4.420027254 |
| ENSMUSG00000021768 | Dusp13   | 5.89E-07    | 17.17613848 |
| ENSMUSG00000021779 | Thrb     | 7.26E-13    | 0.219141495 |
| ENSMUSG00000021798 | Ldb3     | 2.51E-06    | 0.20152815  |
| ENSMUSG00000021822 | Plau     | 4.36E-17    | 6.399387682 |
| ENSMUSG00000021922 | Itih4    | 3.22E-22    | 4.191031663 |
| ENSMUSG00000021939 | Ctsb     | 7.46E-35    | 6.269225564 |
| ENSMUSG00000021943 | Gdf10    | 6.80E-06    | 0.235121374 |
| ENSMUSG00000021986 | Amer2    | 3.64E-17    | 17.02812239 |
| ENSMUSG00000021990 | Spata13  | 4.06E-21    | 4.699888904 |
| ENSMUSG00000021996 | Esd      | 3.01E-27    | 7.69994683  |
| ENSMUSG00000021997 | Lrrc63   | 0.00885911  | 6.664250969 |
| ENSMUSG00000021998 | Lcp1     | 2.27E-26    | 4.971436962 |
| ENSMUSG00000022026 | Olfm4    | 1.33E-05    | 28.67562233 |
| ENSMUSG00000022094 | Slc39a14 | 4.25E-67    | 8.737885142 |
| ENSMUSG00000022096 | Hr       | 1.28E-13    | 0.178678123 |
| ENSMUSG00000022097 | Sftpc    | 0.000238613 | 0.14993943  |
| ENSMUSG00000022122 | Ednrb    | 1.21E-12    | 0.199381878 |
| ENSMUSG00000022126 | Acod1    | 1.21E-229   | 1697.405047 |
| ENSMUSG00000022148 | Fyb      | 3.43E-39    | 6.377785072 |
| ENSMUSG00000022180 | Slc7a8   | 2.51E-56    | 16.91083479 |
| ENSMUSG00000022197 | Pdzd2    | 0.001250752 | 0.22745852  |
| ENSMUSG00000022206 | Npr3     | 9.04E-19    | 0.160647997 |
| ENSMUSG00000022218 | Tgm1     | 5.25E-38    | 9.596664943 |
| ENSMUSG00000022262 | Dnah5    | 5.10E-09    | 0.198980719 |
| ENSMUSG00000022303 | Destamp  | 1.71E-22    | 84.59882475 |
| ENSMUSG00000022304 | Dpys     | 6.37E-05    | 20.33597147 |
| ENSMUSG00000022346 | Myc      | 1.75E-21    | 4.934405914 |
| ENSMUSG00000022367 | Has2     | 6.60E-06    | 13.89308569 |
| ENSMUSG00000022372 | Sla      | 2.80E-14    | 4.06170538  |
| ENSMUSG00000022378 | Fam49b   | 9.90E-39    | 4.256372356 |
| ENSMUSG00000022435 | Upk3a    | 0.000997674 | 0.018807457 |
| ENSMUSG00000022439 | Parvg    | 3.95E-27    | 4.433283914 |
| ENSMUSG00000022449 | Adams20  | 0.002756593 | 0.147516768 |
| ENSMUSG00000022456 | 3-Sep    | 2.38E-06    | 0.235556487 |
| ENSMUSG00000022490 | Ppp1r1a  | 2.65E-05    | 0.149122674 |
| ENSMUSG00000022500 | Litaf    | 9.64E-34    | 6.913589608 |
| ENSMUSG00000022510 | Trp63    | 0.000124548 | 5.251542766 |
| ENSMUSG00000022534 | Mefv     | 3.64E-37    | 33.73451435 |
| ENSMUSG00000022546 | Gpt      | 1.83E-16    | 0.198949348 |
| ENSMUSG00000022564 | Grina    | 1.23E-30    | 6.188517586 |
| ENSMUSG00000022584 | Ly6c2    | 2.28E-10    | 5.175110863 |
| ENSMUSG00000022586 | Ly6i     | 1.83E-99    | 123.3372728 |
| ENSMUSG00000022595 | Lypd2    | 7.45E-21    | 0.12725135  |
| ENSMUSG00000022650 | Retnlb   | 7.82E-06    | 115.8356293 |
| ENSMUSG00000022651 | Retnlg   | 3.85E-06    | 10.98205374 |
| ENSMUSG00000022652 | Morc1    | 0.000403325 | 8.594593668 |
| ENSMUSG00000022667 | Cd200r1  | 2.47E-13    | 4.672337653 |
| ENSMUSG00000022758 | P2rx6    | 6.02E-14    | 0.136562152 |
| ENSMUSG00000022759 | Lrrc74b  | 1.80E-09    | 0.18044745  |
| ENSMUSG00000022831 | Hcls1    | 2.94E-63    | 7.889017196 |
| ENSMUSG00000022840 | Adcy5    | 8.66E-19    | 0.149762053 |
| ENSMUSG00000022876 | Samsn1   | 7.03E-33    | 13.70023981 |
| ENSMUSG00000022878 | Adipoq   | 0.004001095 | 0.057502207 |
| ENSMUSG00000022901 | Cd86     | 4.62E-18    | 6.364671275 |
| ENSMUSG00000022902 | Stfa2    | 2.21E-11    | 181.2698628 |
| ENSMUSG00000022941 | Ripply3  | 1.60E-14    | 0.236740694 |
| ENSMUSG00000022945 | Chaf1b   | 2.87E-13    | 4.03219643  |
| ENSMUSG00000022996 | Wnt10b   | 1.35E-11    | 0.188608492 |

## List 1 continued

|                    |         |             |             |
|--------------------|---------|-------------|-------------|
| ENSMUSG00000023011 | Faim2   | 1.11E-19    | 0.102925282 |
| ENSMUSG00000023045 | Soat2   | 3.83E-24    | 19.01310387 |
| ENSMUSG00000023078 | Cxcl13  | 6.59E-29    | 20.78170732 |
| ENSMUSG00000023087 | Noct    | 5.50E-14    | 4.052278922 |
| ENSMUSG00000023088 | Abcc1   | 5.58E-14    | 4.322433944 |
| ENSMUSG00000023092 | Fhl1    | 1.90E-20    | 0.236828913 |
| ENSMUSG00000023336 | Wfdc1   | 3.53E-14    | 0.195544869 |
| ENSMUSG00000023349 | Clec4n  | 4.50E-56    | 33.75549839 |
| ENSMUSG00000023473 | Celsr3  | 6.77E-09    | 8.408367058 |
| ENSMUSG00000023903 | Mmp25   | 4.61E-31    | 10.21846974 |
| ENSMUSG00000023913 | Pla2g7  | 1.07E-68    | 29.46701967 |
| ENSMUSG00000023947 | Nfkbie  | 8.89E-58    | 9.690491722 |
| ENSMUSG00000023949 | Tcte1   | 6.95E-11    | 0.174179788 |
| ENSMUSG00000023982 | Guca1a  | 1.35E-06    | 4.561598304 |
| ENSMUSG00000023987 | Pgc     | 5.16E-05    | 0.011342063 |
| ENSMUSG00000023992 | Trem2   | 8.41E-16    | 7.884165137 |
| ENSMUSG00000024008 | Cpne5   | 1.88E-12    | 0.088383877 |
| ENSMUSG00000024014 | Pim1    | 2.30E-53    | 7.623795082 |
| ENSMUSG00000024027 | Glp1r   | 7.80E-18    | 0.158873784 |
| ENSMUSG00000024039 | Cbs     | 5.55E-07    | 0.21378467  |
| ENSMUSG00000024041 | Cryaa   | 0.001272025 | 0.161369426 |
| ENSMUSG00000024053 | Emilin2 | 9.62E-28    | 11.97016648 |
| ENSMUSG00000024121 | Atp6v0c | 2.13E-25    | 4.154903012 |
| ENSMUSG00000024164 | C3      | 2.21E-12    | 5.370715296 |
| ENSMUSG00000024186 | Rgs11   | 8.56E-09    | 0.246013462 |
| ENSMUSG00000024222 | Fkbp5   | 0.00374751  | 4.013473477 |
| ENSMUSG00000024300 | Myo1f   | 9.56E-51    | 6.268892749 |
| ENSMUSG00000024349 | Tmem173 | 3.73E-19    | 4.653167349 |
| ENSMUSG00000024354 | Slc23a1 | 7.71E-10    | 0.244428147 |
| ENSMUSG00000024397 | Aif1    | 6.77E-13    | 7.181528518 |
| ENSMUSG00000024401 | Tnf     | 7.43E-128   | 368.3201252 |
| ENSMUSG00000024402 | Lta     | 0.000249935 | 5.345436445 |
| ENSMUSG00000024440 | Pcdh12  | 1.46E-09    | 0.231158427 |
| ENSMUSG00000024521 | Pmaip1  | 1.26E-26    | 4.38758448  |
| ENSMUSG00000024526 | Cidea   | 0.002302039 | 0.175726625 |
| ENSMUSG00000024598 | Fbn2    | 0.000377865 | 0.027567237 |
| ENSMUSG00000024621 | Csflr   | 3.86E-22    | 4.104890467 |
| ENSMUSG00000024661 | Fth1    | 9.84E-31    | 8.553760479 |
| ENSMUSG00000024672 | Ms4a7   | 1.24E-17    | 6.793315909 |
| ENSMUSG00000024675 | Ms4a4c  | 0.000451937 | 7.952393056 |
| ENSMUSG00000024679 | Ms4a6d  | 3.93E-43    | 18.99537541 |
| ENSMUSG00000024737 | Slc15a3 | 5.98E-80    | 12.92728355 |
| ENSMUSG00000024770 | Lipn    | 0.000580809 | 68.16930324 |
| ENSMUSG00000024774 | Ankrd22 | 1.10E-06    | 14.57313389 |
| ENSMUSG00000024798 | Htr7    | 7.88E-26    | 20.21591029 |
| ENSMUSG00000024803 | Ankrd1  | 8.93E-22    | 7.623173152 |
| ENSMUSG00000024907 | Gal     | 9.67E-07    | 0.145773888 |
| ENSMUSG00000024953 | Prdx5   | 5.63E-63    | 8.541310834 |
| ENSMUSG00000025017 | Pik3ap1 | 3.75E-28    | 6.365639157 |
| ENSMUSG00000025044 | Msr1    | 1.51E-115   | 65.15012469 |
| ENSMUSG00000025150 | Cbr2    | 3.01E-24    | 0.14358325  |
| ENSMUSG00000025161 | Slc16a3 | 9.18E-35    | 11.86029763 |
| ENSMUSG00000025165 | Sectm1a | 1.67E-06    | 20.86993407 |
| ENSMUSG00000025175 | Fn3k    | 3.01E-05    | 0.089038637 |
| ENSMUSG00000025225 | Nfkb2   | 2.07E-27    | 4.689157256 |
| ENSMUSG00000025318 | Jph3    | 3.26E-06    | 13.7285589  |
| ENSMUSG00000025321 | Itgb8   | 9.10E-09    | 5.575199538 |
| ENSMUSG00000025355 | Mmp19   | 5.92E-16    | 4.419847403 |
| ENSMUSG00000025383 | Il23a   | 1.19E-16    | 50.78814098 |
| ENSMUSG00000025429 | Pstpip2 | 1.18E-46    | 9.404831365 |
| ENSMUSG00000025473 | Adam8   | 1.56E-09    | 14.90574738 |
| ENSMUSG00000025479 | Cyp2e1  | 7.82E-05    | 0.056338338 |
| ENSMUSG00000025488 | Cox8b   | 2.22E-06    | 0.135908506 |
| ENSMUSG00000025491 | Ifitm1  | 1.47E-15    | 4.499221909 |

## List 1 continued

|                    |         |             |             |
|--------------------|---------|-------------|-------------|
| ENSMUSG00000025498 | Irf7    | 0.00110774  | 9.473183021 |
| ENSMUSG00000025576 | Rbfox3  | 4.58E-05    | 0.234603551 |
| ENSMUSG00000025591 | Tma16   | 2.49E-29    | 5.026239014 |
| ENSMUSG00000025658 | Cnksr2  | 3.91E-08    | 0.135405812 |
| ENSMUSG00000025746 | Il6     | 4.75E-13    | 128.5313558 |
| ENSMUSG00000025784 | Clec3b  | 0.000967242 | 0.181919566 |
| ENSMUSG00000025789 | St8sia2 | 3.41E-09    | 0.171713603 |
| ENSMUSG00000025804 | Ccr1    | 4.27E-62    | 27.03619308 |
| ENSMUSG00000025854 | Fam20c  | 3.01E-27    | 9.143303908 |
| ENSMUSG00000025877 | Hk3     | 5.24E-99    | 37.003006   |
| ENSMUSG00000025900 | Rp1     | 2.91E-08    | 0.204752878 |
| ENSMUSG00000025929 | Il17a   | 0.000465094 | 317.4293269 |
| ENSMUSG00000025936 | Gm4956  | 9.24E-13    | 0.136203951 |
| ENSMUSG00000025963 | Mdh1b   | 3.82E-05    | 0.244686156 |
| ENSMUSG00000025993 | Slc40a1 | 3.10E-10    | 4.096770841 |
| ENSMUSG00000026011 | Ctla4   | 1.15E-22    | 11.161765   |
| ENSMUSG00000026068 | Il18rap | 6.97E-18    | 4.837901591 |
| ENSMUSG00000026073 | Il1r2   | 1.27E-69    | 95.9813252  |
| ENSMUSG00000026109 | Tmeff2  | 1.01E-07    | 0.216791464 |
| ENSMUSG00000026166 | Ccl20   | 6.62E-10    | 22.12129923 |
| ENSMUSG00000026177 | Slc11a1 | 3.33E-82    | 36.07569496 |
| ENSMUSG00000026180 | Cxcr2   | 1.44E-27    | 10.67373329 |
| ENSMUSG00000026193 | Fn1     | 7.29E-19    | 4.412839219 |
| ENSMUSG00000026205 | Slc23a3 | 0.002582428 | 4.158356912 |
| ENSMUSG00000026237 | Nmur1   | 0.003690939 | 0.117917801 |
| ENSMUSG00000026271 | Gpr35   | 1.97E-35    | 9.876376658 |
| ENSMUSG00000026285 | Pcd1    | 9.55E-11    | 9.793475505 |
| ENSMUSG00000026301 | Iqca    | 2.27E-10    | 0.20447359  |
| ENSMUSG00000026358 | Rgs1    | 1.55E-31    | 21.41536675 |
| ENSMUSG00000026390 | Marco   | 1.83E-15    | 4.229018091 |
| ENSMUSG00000026475 | Rgs16   | 2.87E-21    | 10.98402608 |
| ENSMUSG00000026480 | Ncf2    | 6.16E-31    | 5.163463858 |
| ENSMUSG00000026536 | Ifi211  | 1.67E-07    | 17.85386194 |
| ENSMUSG00000026573 | Xcl1    | 0.008695896 | 4.492572033 |
| ENSMUSG00000026580 | Selp    | 2.28E-35    | 11.34401679 |
| ENSMUSG00000026582 | Sele    | 3.91E-16    | 9.750339672 |
| ENSMUSG00000026610 | Esrrg   | 0.000323972 | 0.245428212 |
| ENSMUSG00000026628 | Atf3    | 1.80E-16    | 5.971392583 |
| ENSMUSG00000026656 | Fcgr2b  | 6.97E-48    | 14.66243702 |
| ENSMUSG00000026676 | Ccdc3   | 0.000798567 | 0.056221337 |
| ENSMUSG00000026691 | Fmo3    | 3.20E-18    | 0.080384481 |
| ENSMUSG00000026749 | Nek6    | 4.16E-20    | 4.130806977 |
| ENSMUSG00000026768 | Itga8   | 5.19E-25    | 0.166650067 |
| ENSMUSG00000026786 | Apbb1ip | 1.70E-25    | 4.578851487 |
| ENSMUSG00000026821 | Ralgds  | 2.21E-33    | 4.671816651 |
| ENSMUSG00000026822 | Lcn2    | 1.24E-156   | 42.60425184 |
| ENSMUSG00000026824 | Kenj3   | 0.007235808 | 0.075156276 |
| ENSMUSG00000026874 | He      | 0.004477609 | 0.179050409 |
| ENSMUSG00000026879 | Gsn     | 8.11E-19    | 0.199772893 |
| ENSMUSG00000026961 | Lrrc26  | 1.44E-10    | 0.158995673 |
| ENSMUSG00000026979 | Psd4    | 5.58E-25    | 4.096753661 |
| ENSMUSG00000026981 | Il1rn   | 6.18E-180   | 100.7363338 |
| ENSMUSG00000026984 | Il1f6   | 2.17E-05    | 135.1112892 |
| ENSMUSG00000027068 | Dhrs9   | 5.42E-11    | 5.484093841 |
| ENSMUSG00000027199 | Gatm    | 4.31E-09    | 4.970944294 |
| ENSMUSG00000027219 | Slc28a2 | 4.92E-10    | 4.064449874 |
| ENSMUSG00000027220 | Syt13   | 0.001709915 | 8.858590217 |
| ENSMUSG00000027296 | Itpka   | 1.04E-09    | 0.206321266 |
| ENSMUSG00000027333 | Smox    | 2.65E-21    | 5.377467572 |
| ENSMUSG00000027368 | Dusp2   | 1.45E-15    | 4.157260392 |
| ENSMUSG00000027376 | Prom2   | 1.58E-05    | 0.09632493  |
| ENSMUSG00000027398 | Il1b    | 7.90E-59    | 46.71511426 |
| ENSMUSG00000027399 | Il1a    | 1.06E-100   | 95.66406742 |
| ENSMUSG00000027442 | Cst8    | 6.85E-18    | 0.023804885 |

## List 1 continued

|                    |               |             |             |
|--------------------|---------------|-------------|-------------|
| ENSMUSG00000027483 | Bpifa1        | 0.000150683 | 0.08063213  |
| ENSMUSG00000027500 | Stmn2         | 2.70E-23    | 0.188094412 |
| ENSMUSG00000027513 | Pck1          | 1.86E-05    | 0.052631554 |
| ENSMUSG00000027514 | Zbp1          | 7.62E-06    | 14.29554446 |
| ENSMUSG00000027524 | Edn3          | 3.38E-11    | 0.235721196 |
| ENSMUSG00000027555 | Car13         | 2.47E-42    | 7.457076288 |
| ENSMUSG00000027559 | Car3          | 9.46E-23    | 0.037233943 |
| ENSMUSG00000027560 | Dok5          | 6.17E-05    | 25.63412077 |
| ENSMUSG00000027579 | Srms          | 4.50E-06    | 0.234206565 |
| ENSMUSG00000027611 | Procr         | 1.68E-44    | 13.332059   |
| ENSMUSG00000027670 | Ocstamp       | 2.51E-13    | 30.27615486 |
| ENSMUSG00000027716 | Trpc3         | 6.86E-07    | 0.15228372  |
| ENSMUSG00000027737 | Slc7a11       | 3.30E-134   | 267.9960415 |
| ENSMUSG00000027776 | Ili2a         | 7.67E-13    | 6.606409415 |
| ENSMUSG00000027796 | Smad9         | 2.51E-14    | 0.151379367 |
| ENSMUSG00000027832 | Ptx3          | 4.69E-07    | 38.25712855 |
| ENSMUSG00000027875 | Hmgcs2        | 1.88E-09    | 0.140459252 |
| ENSMUSG00000027995 | Thr2          | 2.28E-84    | 22.05509583 |
| ENSMUSG00000028001 | Fga           | 1.79E-07    | 12.28964414 |
| ENSMUSG00000028003 | Lrat          | 4.41E-12    | 0.176142093 |
| ENSMUSG00000028011 | Tdo2          | 0.000328644 | 5.335459776 |
| ENSMUSG00000028036 | Ptgfr         | 5.68E-12    | 0.142026821 |
| ENSMUSG00000028064 | Sema4a        | 2.27E-26    | 4.076859806 |
| ENSMUSG00000028088 | Fmo5          | 1.08E-23    | 0.212869207 |
| ENSMUSG00000028111 | Ctsk          | 5.22E-18    | 4.885831581 |
| ENSMUSG00000028116 | Myoz2         | 1.38E-06    | 0.102405616 |
| ENSMUSG00000028128 | F3            | 1.14E-20    | 6.801163043 |
| ENSMUSG00000028139 | Riad1         | 2.04E-08    | 0.240326462 |
| ENSMUSG00000028255 | Clea1         | 5.31E-14    | 0.008803941 |
| ENSMUSG00000028270 | Gbp2          | 0.000106504 | 12.11334918 |
| ENSMUSG00000028327 | Stra61        | 8.61E-11    | 8.06372984  |
| ENSMUSG00000028332 | Hemgn         | 0.008940549 | 0.053069318 |
| ENSMUSG00000028356 | Ambp          | 1.11E-05    | 21.64944276 |
| ENSMUSG00000028359 | Orm3          | 2.03E-08    | 7.187613117 |
| ENSMUSG00000028364 | Tnc           | 6.46E-85    | 14.4160296  |
| ENSMUSG00000028417 | Tal2          | 0.000332876 | 13.54935099 |
| ENSMUSG00000028434 | Epb4114b      | 3.90E-24    | 0.192960812 |
| ENSMUSG00000028441 | I110017D15Rik | 2.63E-09    | 0.210965158 |
| ENSMUSG00000028488 | Sh3gl2        | 4.30E-11    | 0.089501607 |
| ENSMUSG00000028599 | Tnfrsf1b      | 2.43E-80    | 16.38198225 |
| ENSMUSG00000028602 | Tnfrsf8       | 1.20E-27    | 22.61613691 |
| ENSMUSG00000028613 | Lrp8          | 1.49E-52    | 20.26394632 |
| ENSMUSG00000028645 | Slc2a1        | 3.18E-29    | 5.848087253 |
| ENSMUSG00000028655 | Mfsd2a        | 1.54E-05    | 0.244131091 |
| ENSMUSG00000028680 | Plk3          | 3.00E-20    | 7.347745691 |
| ENSMUSG00000028730 | Cfap57        | 6.24E-14    | 0.158895753 |
| ENSMUSG00000028766 | Alpl          | 5.81E-36    | 11.41121997 |
| ENSMUSG00000028780 | Sema3c        | 2.38E-19    | 0.243501819 |
| ENSMUSG00000028793 | Rnf19b        | 1.63E-38    | 5.359074565 |
| ENSMUSG00000028845 | Tekt2         | 1.80E-08    | 0.218623899 |
| ENSMUSG00000028859 | Csf3r         | 7.83E-18    | 9.369264802 |
| ENSMUSG00000028874 | Fgr           | 2.60E-51    | 9.024889639 |
| ENSMUSG00000028885 | Smpd13b       | 4.31E-40    | 14.84563983 |
| ENSMUSG00000028940 | HeS1          | 1.37E-14    | 0.01987271  |
| ENSMUSG00000028965 | Tnfrsf9       | 1.87E-92    | 38.01319221 |
| ENSMUSG00000028970 | Abcb1b        | 8.75E-14    | 4.805698985 |
| ENSMUSG00000028996 | Rbp7          | 0.000353119 | 0.116509519 |
| ENSMUSG00000029075 | Tnfrsf4       | 3.28E-08    | 5.696448952 |
| ENSMUSG00000029082 | Bst1          | 1.08E-63    | 10.95796274 |
| ENSMUSG00000029088 | Kenip4        | 0.001136397 | 0.234728066 |
| ENSMUSG00000029120 | Ppp2r2c       | 8.92E-09    | 0.118919036 |
| ENSMUSG00000029168 | Dpysl5        | 5.49E-09    | 0.207951022 |
| ENSMUSG00000029182 | I700001C02Rik | 6.92E-08    | 0.22555372  |
| ENSMUSG00000029273 | Sult1d1       | 3.29E-05    | 0.06749397  |

## List 1 continued

|                    |          |             |             |
|--------------------|----------|-------------|-------------|
| ENSMUSG00000029304 | Spp1     | 8.01E-10    | 19.91233169 |
| ENSMUSG00000029322 | Plac8    | 1.14E-20    | 6.911120271 |
| ENSMUSG00000029335 | Bmp3     | 2.30E-15    | 0.218735336 |
| ENSMUSG00000029371 | Cxcl5    | 0.00027586  | 25.58258012 |
| ENSMUSG00000029377 | Ereg     | 5.90E-15    | 29.18604353 |
| ENSMUSG00000029379 | Cxcl3    | 1.08E-24    | 1088.523538 |
| ENSMUSG00000029380 | Cxcl1    | 8.74E-62    | 118.7823175 |
| ENSMUSG00000029414 | Kntc1    | 5.77E-12    | 6.141112633 |
| ENSMUSG00000029417 | Cxcl9    | 5.53E-08    | 99.62982301 |
| ENSMUSG00000029438 | Bcl7a    | 5.51E-18    | 0.232412664 |
| ENSMUSG00000029490 | Mfsd7a   | 1.26E-21    | 6.266072295 |
| ENSMUSG00000029561 | Oas2     | 0.001206106 | 5.792639519 |
| ENSMUSG00000029596 | Sdsl     | 0.001169209 | 4.6657866   |
| ENSMUSG00000029608 | Rph3a    | 0.000167962 | 35.4476409  |
| ENSMUSG00000029657 | Hsph1    | 0.005706598 | 0.229450914 |
| ENSMUSG00000029664 | Tfp2     | 5.01E-07    | 4.098583196 |
| ENSMUSG00000029699 | Ssc4d    | 3.02E-05    | 4.518858312 |
| ENSMUSG00000029727 | Cyp3a13  | 1.89E-09    | 0.243886357 |
| ENSMUSG00000029771 | Irf5     | 7.17E-15    | 4.039816773 |
| ENSMUSG00000029816 | Gpnb     | 1.23E-36    | 25.93359598 |
| ENSMUSG00000029819 | Npy      | 0.000201484 | 76.13465475 |
| ENSMUSG00000029843 | Slc13a4  | 8.28E-09    | 0.129408724 |
| ENSMUSG00000029915 | Clec5a   | 3.50E-141   | 62.39076324 |
| ENSMUSG00000030048 | Gkn3     | 6.80E-06    | 0.052958704 |
| ENSMUSG00000030069 | Prok2    | 7.08E-11    | 454.7258137 |
| ENSMUSG00000030077 | Chl1     | 4.86E-12    | 69.8476726  |
| ENSMUSG00000030087 | Klf15    | 1.07E-19    | 0.205281152 |
| ENSMUSG00000030103 | Bhlhe40  | 4.63E-29    | 7.534990036 |
| ENSMUSG00000030108 | Slc6a13  | 2.69E-11    | 99.7393417  |
| ENSMUSG00000030109 | Slc6a12  | 1.39E-20    | 215.3147297 |
| ENSMUSG00000030111 | A2m      | 0.000245003 | 8.884244638 |
| ENSMUSG00000030117 | Gdf3     | 0.000327057 | 22.31254788 |
| ENSMUSG00000030125 | Lrrc23   | 4.45E-13    | 0.212705449 |
| ENSMUSG00000030142 | Clec4e   | 2.24E-128   | 241.3105668 |
| ENSMUSG00000030144 | Clec4d   | 4.92E-75    | 96.47048929 |
| ENSMUSG00000030147 | Clec4b1  | 0.001852053 | 0.192098897 |
| ENSMUSG00000030148 | Clec4a2  | 9.26E-13    | 4.914212721 |
| ENSMUSG00000030155 | Clec2e   | 0.003074613 | 5.802285472 |
| ENSMUSG00000030162 | Olr1     | 6.54E-33    | 9.269503837 |
| ENSMUSG00000030187 | Klra2    | 1.20E-13    | 4.491968873 |
| ENSMUSG00000030268 | Beat1    | 0.000133207 | 15.03273861 |
| ENSMUSG00000030278 | Cidec    | 1.78E-18    | 0.069135367 |
| ENSMUSG00000030302 | Atp2b2   | 2.47E-13    | 0.107286349 |
| ENSMUSG00000030306 | Tmtc1    | 1.43E-15    | 0.232040167 |
| ENSMUSG00000030399 | Ckm      | 6.86E-06    | 0.009655962 |
| ENSMUSG00000030402 | Ppm1n    | 1.15E-06    | 23.13707331 |
| ENSMUSG00000030427 | Lilra6   | 1.12E-26    | 10.17488458 |
| ENSMUSG00000030470 | Csrp3    | 5.33E-12    | 0.051141131 |
| ENSMUSG00000030472 | Ceacam18 | 1.46E-06    | 14.80924533 |
| ENSMUSG00000030474 | Siglece  | 6.58E-30    | 10.14881666 |
| ENSMUSG00000030483 | Cyp2b10  | 2.82E-17    | 0.200231753 |
| ENSMUSG00000030495 | Slc7a10  | 5.12E-15    | 0.116617817 |
| ENSMUSG00000030544 | Mesp1    | 0.004528011 | 0.170711587 |
| ENSMUSG00000030546 | Plin1    | 2.81E-05    | 0.070892409 |
| ENSMUSG00000030553 | Pgpep11  | 0.002418338 | 0.062922163 |
| ENSMUSG00000030554 | Synn     | 1.31E-32    | 0.146179568 |
| ENSMUSG00000030579 | Tyrobp   | 1.22E-29    | 6.518839711 |
| ENSMUSG00000030657 | Xylt1    | 3.07E-26    | 8.477265743 |
| ENSMUSG00000030737 | Slco2b1  | 3.10E-08    | 0.249515092 |
| ENSMUSG00000030747 | Dgat2    | 0.009450761 | 4.063370941 |
| ENSMUSG00000030786 | Irgam    | 8.90E-44    | 19.8864588  |
| ENSMUSG00000030793 | Pycard   | 1.02E-23    | 4.481980248 |
| ENSMUSG00000030895 | Hpx      | 2.11E-09    | 6.149220216 |
| ENSMUSG00000031027 | Stk33    | 1.55E-06    | 0.212570891 |

## List 1 continued

|                    |               |             |             |
|--------------------|---------------|-------------|-------------|
| ENSMUSG00000031098 | Syt8          | 3.01E-05    | 10.12149611 |
| ENSMUSG00000031104 | Rab33a        | 0.000617015 | 11.73471111 |
| ENSMUSG00000031147 | Magix         | 2.38E-19    | 0.131480765 |
| ENSMUSG00000031163 | Glod5         | 0.000572794 | 19.14692167 |
| ENSMUSG00000031173 | Otc           | 0.004243372 | 0.157015258 |
| ENSMUSG00000031266 | Gla           | 5.06E-40    | 10.19287665 |
| ENSMUSG00000031283 | Chrd11        | 1.92E-08    | 0.199835219 |
| ENSMUSG00000031289 | Il13ra2       | 0.001696974 | 37.5471423  |
| ENSMUSG00000031294 | D630029K05Rik | 8.61E-05    | 0.154713002 |
| ENSMUSG00000031312 | Itgb1bp2      | 0.001610977 | 0.121308415 |
| ENSMUSG00000031444 | F10           | 8.34E-95    | 51.78242703 |
| ENSMUSG00000031461 | Myom2         | 3.98E-05    | 0.104289638 |
| ENSMUSG00000031489 | Adrb3         | 4.48E-09    | 0.178457755 |
| ENSMUSG00000031494 | Cd209a        | 0.000561054 | 0.103935522 |
| ENSMUSG00000031504 | Rab20         | 2.17E-43    | 10.57573882 |
| ENSMUSG00000031551 | Ido1          | 0.002754801 | 11.27803406 |
| ENSMUSG00000031554 | Adam5         | 0.000137313 | 0.058030505 |
| ENSMUSG00000031562 | Dctd          | 1.53E-05    | 5.85507953  |
| ENSMUSG00000031584 | Gsr           | 1.40E-20    | 5.561973503 |
| ENSMUSG00000031594 | Fgl1          | 0.000429282 | 5.998031585 |
| ENSMUSG00000031596 | Slc7a2        | 6.30E-29    | 5.314591755 |
| ENSMUSG00000031610 | Scrg1         | 4.64E-05    | 7.715872038 |
| ENSMUSG00000031613 | Hpgd          | 2.97E-15    | 0.23463581  |
| ENSMUSG00000031662 | Snx20         | 1.12E-53    | 8.84381917  |
| ENSMUSG00000031725 | Ces1f         | 6.29E-21    | 0.014239424 |
| ENSMUSG00000031762 | Mt2           | 3.42E-13    | 21.91316661 |
| ENSMUSG00000031765 | Mt1           | 5.59E-26    | 8.872498196 |
| ENSMUSG00000031775 | Plp           | 2.02E-19    | 0.143497355 |
| ENSMUSG00000031786 | Drc7          | 2.26E-11    | 0.246018508 |
| ENSMUSG00000031821 | Gins2         | 7.31E-11    | 4.265607066 |
| ENSMUSG00000031827 | Cotl1         | 5.85E-19    | 4.077493067 |
| ENSMUSG00000031831 | Dnaaf1        | 2.50E-08    | 0.228156126 |
| ENSMUSG00000031844 | Hsd17b2       | 0.002286433 | 15.80555117 |
| ENSMUSG00000031870 | Pgr           | 2.28E-11    | 0.095675478 |
| ENSMUSG00000031872 | Bean1         | 0.004025695 | 4.531305873 |
| ENSMUSG00000031881 | Cdh16         | 1.31E-10    | 0.201810819 |
| ENSMUSG00000031891 | Hsd11b2       | 5.12E-08    | 6.314864393 |
| ENSMUSG00000031966 | Glb1l3        | 6.54E-05    | 0.119032399 |
| ENSMUSG00000032000 | Birc3         | 1.22E-25    | 5.106268964 |
| ENSMUSG00000032024 | Clmp          | 5.20E-21    | 6.28623898  |
| ENSMUSG00000032064 | Dixdc1        | 5.04E-16    | 0.213359191 |
| ENSMUSG00000032122 | Slc37a2       | 4.07E-35    | 7.21874537  |
| ENSMUSG00000032204 | Aqp9          | 2.67E-13    | 6.929216797 |
| ENSMUSG00000032224 | Fam81a        | 1.95E-09    | 0.244620722 |
| ENSMUSG00000032246 | Calm4         | 9.64E-09    | 0.208215121 |
| ENSMUSG00000032281 | Acsbg1        | 2.52E-12    | 7.414628511 |
| ENSMUSG00000032294 | Pkm           | 8.81E-28    | 5.573951818 |
| ENSMUSG00000032300 | 1700017B05Rik | 2.22E-24    | 8.381460424 |
| ENSMUSG00000032315 | Cyp1a1        | 0.002869363 | 0.080778694 |
| ENSMUSG00000032322 | Pstpip1       | 1.01E-29    | 5.241073208 |
| ENSMUSG00000032357 | Tinag         | 2.26E-09    | 0.229682697 |
| ENSMUSG00000032487 | Ptgs2         | 5.53E-12    | 6.263341608 |
| ENSMUSG00000032511 | Scn5a         | 3.10E-12    | 0.181677526 |
| ENSMUSG00000032532 | Cek           | 0.000244202 | 71.39567193 |
| ENSMUSG00000032643 | Fh13          | 1.22E-13    | 4.717038745 |
| ENSMUSG00000032649 | Colgalt2      | 9.55E-22    | 0.181467178 |
| ENSMUSG00000032661 | Oas3          | 1.89E-08    | 16.74428331 |
| ENSMUSG00000032688 | Malt1         | 2.90E-70    | 9.701501177 |
| ENSMUSG00000032690 | Oas2          | 0.002273698 | 4.955600021 |
| ENSMUSG00000032691 | Nlrp3         | 4.94E-63    | 30.45240139 |
| ENSMUSG00000032719 | Sbspon        | 0.000525424 | 0.086978254 |
| ENSMUSG00000032724 | Abtb2         | 7.97E-25    | 5.588517949 |
| ENSMUSG00000032802 | Srxn1         | 2.87E-12    | 4.616512665 |
| ENSMUSG00000032845 | Alpk2         | 6.00E-05    | 7.966044077 |

## List 1 continued

|                    |              |             |             |
|--------------------|--------------|-------------|-------------|
| ENSMUSG00000032854 | Ugt8a        | 0.000219217 | 0.166205073 |
| ENSMUSG00000032860 | P2ry2        | 5.71E-19    | 4.30061048  |
| ENSMUSG00000032925 | Itgb11       | 7.54E-10    | 0.105203708 |
| ENSMUSG00000032942 | Ucp3         | 4.92E-08    | 0.108652559 |
| ENSMUSG00000033152 | Podxl2       | 8.54E-07    | 0.19896431  |
| ENSMUSG00000033192 | Lpcat2       | 7.62E-63    | 14.89233309 |
| ENSMUSG00000033207 | Mamdc2       | 6.95E-19    | 0.158833594 |
| ENSMUSG00000033213 | AA467197     | 3.39E-206   | 164.3650773 |
| ENSMUSG00000033307 | Mif          | 1.65E-15    | 4.318816235 |
| ENSMUSG00000033355 | Rtp4         | 0.005478424 | 4.161128703 |
| ENSMUSG00000033508 | Asprv1       | 2.12E-17    | 140.8372685 |
| ENSMUSG00000033538 | Casp4        | 1.02E-43    | 10.09162136 |
| ENSMUSG00000033578 | Tmem35a      | 6.43E-06    | 0.164441955 |
| ENSMUSG00000033595 | Lgi3         | 7.95E-16    | 0.149150848 |
| ENSMUSG00000033644 | Piwil2       | 8.17E-29    | 32.1708933  |
| ENSMUSG00000033731 | 330002A11Rik | 3.10E-07    | 0.178312722 |
| ENSMUSG00000033763 | Mtss11       | 1.32E-15    | 0.212103285 |
| ENSMUSG00000033768 | Nrxn2        | 2.65E-12    | 0.20404291  |
| ENSMUSG00000033777 | Tlr13        | 1.84E-45    | 25.31957004 |
| ENSMUSG00000033860 | Fgg          | 1.25E-05    | 4.765696926 |
| ENSMUSG00000033948 | Zswim5       | 3.29E-09    | 0.217618212 |
| ENSMUSG00000034116 | Vav1         | 2.47E-71    | 10.12371168 |
| ENSMUSG00000034226 | Rhov         | 4.68E-32    | 18.09076045 |
| ENSMUSG00000034245 | Hdac11       | 2.33E-15    | 0.226803068 |
| ENSMUSG00000034248 | Sle25a37     | 6.30E-29    | 5.314210992 |
| ENSMUSG00000034295 | Fhod3        | 0.00030915  | 0.17400262  |
| ENSMUSG00000034361 | Cpne2        | 5.96E-14    | 5.940990777 |
| ENSMUSG00000034391 | Fbxo15       | 0.000730854 | 5.85726711  |
| ENSMUSG00000034394 | Lif          | 1.08E-14    | 7.172093688 |
| ENSMUSG00000034416 | Pkd112       | 7.41E-06    | 15.17779501 |
| ENSMUSG00000034460 | Six4         | 1.54E-11    | 0.183052743 |
| ENSMUSG00000034467 | Dynlrb2      | 1.85E-10    | 0.245907243 |
| ENSMUSG00000034593 | Myo5a        | 7.51E-25    | 4.078122121 |
| ENSMUSG00000034641 | Cd300ld      | 1.78E-16    | 6.739339195 |
| ENSMUSG00000034648 | Lrrn1        | 0.006609371 | 12.63832671 |
| ENSMUSG00000034652 | Cd300a       | 3.03E-14    | 4.928472124 |
| ENSMUSG00000034765 | Dusp5        | 2.31E-14    | 4.517519213 |
| ENSMUSG00000034810 | Scn7a        | 2.62E-16    | 0.221680797 |
| ENSMUSG00000034825 | Nrip3        | 2.88E-06    | 7.03942618  |
| ENSMUSG00000034855 | Cxcl10       | 5.60E-11    | 178.795138  |
| ENSMUSG00000034987 | Hrh2         | 6.58E-15    | 7.056675961 |
| ENSMUSG00000035004 | Igsf6        | 4.80E-67    | 14.77859865 |
| ENSMUSG00000035105 | Egln3        | 3.06E-08    | 18.64597878 |
| ENSMUSG00000035186 | Ubd          | 1.76E-11    | 150.9277132 |
| ENSMUSG00000035208 | Slfm8        | 4.75E-05    | 8.353439853 |
| ENSMUSG00000035258 | Abi3bp       | 2.43E-16    | 0.196486207 |
| ENSMUSG00000035296 | Sgeg         | 2.85E-05    | 0.116100079 |
| ENSMUSG00000035352 | Ccl12        | 4.38E-30    | 22.2673239  |
| ENSMUSG00000035356 | Nfkbiz       | 5.74E-39    | 7.4745814   |
| ENSMUSG00000035373 | Ccl7         | 5.09E-14    | 84.49006544 |
| ENSMUSG00000035385 | Ccl2         | 9.08E-109   | 202.4628751 |
| ENSMUSG00000035407 | Kank4        | 2.43E-25    | 0.10803296  |
| ENSMUSG00000035458 | Tnni3        | 0.000204106 | 0.220270425 |
| ENSMUSG00000035486 | Plk5         | 1.11E-06    | 0.086158371 |
| ENSMUSG00000035493 | Tgfbi        | 1.58E-86    | 12.45114771 |
| ENSMUSG00000035671 | Zswim4       | 8.80E-14    | 4.726735126 |
| ENSMUSG00000035673 | Sbno2        | 5.02E-24    | 4.452589037 |
| ENSMUSG00000035686 | Thrsp        | 8.85E-12    | 0.07027376  |
| ENSMUSG00000035692 | Isg15        | 0.001002914 | 11.70461549 |
| ENSMUSG00000035860 | Cdhr3        | 8.77E-12    | 0.224517793 |
| ENSMUSG00000035910 | Dede2a       | 1.01E-13    | 0.073129947 |
| ENSMUSG00000035916 | Ptprq        | 0.001073726 | 7.027501736 |
| ENSMUSG00000036062 | Phf24        | 2.31E-12    | 0.222831458 |
| ENSMUSG00000036067 | Sle2a6       | 4.71E-41    | 15.05415148 |



## List 1 continued

|                    |          |             |             |
|--------------------|----------|-------------|-------------|
| ENSMUSG00000036095 | Dgkb     | 0.000569245 | 0.123814598 |
| ENSMUSG00000036223 | Ska1     | 0.006844642 | 4.283133654 |
| ENSMUSG00000036295 | Lrrn3    | 2.88E-11    | 0.21014148  |
| ENSMUSG00000036362 | P2ry13   | 2.51E-23    | 6.576585958 |
| ENSMUSG00000036395 | Glb112   | 1.18E-19    | 0.17764396  |
| ENSMUSG00000036412 | Arsi     | 1.35E-06    | 4.894434983 |
| ENSMUSG00000036469 | l-Mar    | 1.44E-27    | 4.9659905   |
| ENSMUSG00000036478 | Btg1     | 5.14E-21    | 4.339214032 |
| ENSMUSG00000036585 | Fgf1     | 2.62E-26    | 0.180907165 |
| ENSMUSG00000036813 | Entpd8   | 0.001365346 | 0.108042671 |
| ENSMUSG00000036820 | Amdhd2   | 2.01E-18    | 4.536570229 |
| ENSMUSG00000036833 | Pnpla7   | 8.41E-16    | 4.375620111 |
| ENSMUSG00000036931 | Nfkbid   | 1.87E-41    | 14.39227709 |
| ENSMUSG00000037014 | Sstr4    | 0.000179108 | 0.215178099 |
| ENSMUSG00000037016 | Frem2    | 3.21E-05    | 0.180791838 |
| ENSMUSG00000037053 | Azgp1    | 1.60E-12    | 0.123645645 |
| ENSMUSG00000037095 | Lrg1     | 6.38E-44    | 6.498440989 |
| ENSMUSG00000037101 | Ttc29    | 1.09E-10    | 0.193298457 |
| ENSMUSG00000037259 | Dzank1   | 1.33E-08    | 0.185106101 |
| ENSMUSG00000037321 | Tap1     | 1.25E-08    | 4.561246096 |
| ENSMUSG00000037362 | Nov      | 1.85E-05    | 0.232897819 |
| ENSMUSG00000037411 | Serpine1 | 1.33E-17    | 5.187831222 |
| ENSMUSG00000037451 | Slc22a20 | 0.005578223 | 11.78952592 |
| ENSMUSG00000037477 | Tbx10    | 0.00096279  | 71.21764626 |
| ENSMUSG00000037492 | Zmat4    | 0.000305685 | 0.109756143 |
| ENSMUSG00000037541 | Shank2   | 1.24E-08    | 0.228991744 |
| ENSMUSG00000037568 | Vash2    | 0.00306949  | 4.004323943 |
| ENSMUSG00000037613 | Tnfrsf23 | 3.93E-44    | 23.59447379 |
| ENSMUSG00000037624 | Kcnk2    | 3.76E-21    | 0.238515511 |
| ENSMUSG00000037731 | Themis2  | 6.36E-15    | 4.356444724 |
| ENSMUSG00000037771 | Slc32a1  | 0.000332876 | 12.50054815 |
| ENSMUSG00000037801 | Iqch     | 0.006325705 | 0.102511154 |
| ENSMUSG00000037846 | Rtkn2    | 5.40E-17    | 0.147690713 |
| ENSMUSG00000037860 | Aim2     | 8.96E-15    | 4.533493182 |
| ENSMUSG00000037868 | Egr2     | 9.50E-27    | 6.04936612  |
| ENSMUSG00000037872 | Ackr1    | 1.79E-09    | 21.34661068 |
| ENSMUSG00000037921 | Ddx60    | 0.002513878 | 5.100094248 |
| ENSMUSG00000037946 | Fgd3     | 1.49E-24    | 7.355458122 |
| ENSMUSG00000037960 | Card19   | 2.18E-17    | 4.378285051 |
| ENSMUSG00000037966 | Ninj1    | 1.89E-56    | 12.36496983 |
| ENSMUSG00000037973 | Ccdc129  | 1.27E-20    | 0.075755043 |
| ENSMUSG00000038011 | Dnah10   | 2.00E-08    | 0.22932067  |
| ENSMUSG00000038037 | Socs1    | 8.13E-05    | 9.37668876  |
| ENSMUSG00000038060 | Dlec1    | 5.37E-08    | 0.183689112 |
| ENSMUSG00000038065 | Mturn    | 1.03E-35    | 0.143030441 |
| ENSMUSG00000038067 | Csf3     | 5.56E-30    | 158.6740026 |
| ENSMUSG00000038077 | Kena6    | 0.000823026 | 0.018288711 |
| ENSMUSG00000038147 | Cd84     | 1.80E-27    | 5.284747369 |
| ENSMUSG00000038168 | P3h2     | 6.38E-13    | 0.236466922 |
| ENSMUSG00000038179 | Slamf7   | 6.60E-09    | 5.689010775 |
| ENSMUSG00000038292 | Ccdc155  | 5.94E-05    | 0.218122189 |
| ENSMUSG00000038301 | Snx10    | 3.33E-50    | 7.612178133 |
| ENSMUSG00000038352 | Arl5c    | 4.42E-11    | 4.052507441 |
| ENSMUSG00000038370 | Pcp4l1   | 9.51E-19    | 0.248005728 |
| ENSMUSG00000038418 | Egr1     | 7.85E-13    | 5.546206731 |
| ENSMUSG00000038508 | Gdf15    | 3.23E-34    | 10.88876693 |
| ENSMUSG00000038527 | C1rl     | 4.20E-28    | 5.352325569 |
| ENSMUSG00000038572 | Bpifb5   | 1.08E-09    | 0.130697646 |
| ENSMUSG00000038642 | Ctss     | 3.07E-22    | 4.898253066 |
| ENSMUSG00000038663 | Fsd2     | 2.14E-06    | 0.231457691 |
| ENSMUSG00000038756 | Ttl6     | 1.53E-08    | 0.104235828 |
| ENSMUSG00000038791 | Scgb3a2  | 6.31E-49    | 0.084987913 |
| ENSMUSG00000038801 | Scgb1c1  | 1.34E-08    | 0.239980296 |
| ENSMUSG00000038843 | Gcnt1    | 7.53E-17    | 5.586043687 |

## List 1 continued

|                    |           |             |             |
|--------------------|-----------|-------------|-------------|
| ENSMUSG00000038963 | Slco4a1   | 5.21E-13    | 5.889260284 |
| ENSMUSG00000039058 | Ak5       | 0.000316114 | 6.059486985 |
| ENSMUSG00000039084 | Chad      | 9.58E-19    | 0.131853751 |
| ENSMUSG00000039099 | Wdr93     | 0.000345474 | 0.240292734 |
| ENSMUSG00000039109 | F13a1     | 3.67E-07    | 13.71611494 |
| ENSMUSG00000039114 | Nrn1      | 2.62E-19    | 0.141274651 |
| ENSMUSG00000039155 | Cdh26     | 0.004188954 | 0.138428111 |
| ENSMUSG00000039196 | Orm1      | 1.18E-129   | 339.8874892 |
| ENSMUSG00000039208 | Metrl     | 5.30E-14    | 4.53373187  |
| ENSMUSG00000039232 | Stx11     | 4.01E-11    | 4.601780073 |
| ENSMUSG00000039257 | Vstm2b    | 3.62E-05    | 0.048045778 |
| ENSMUSG00000039323 | Igfbp2    | 7.44E-13    | 0.189520099 |
| ENSMUSG00000039364 | Sectm1b   | 0.000202811 | 31.11449631 |
| ENSMUSG00000039395 | Mreg      | 3.68E-14    | 31.9637136  |
| ENSMUSG00000039452 | Snx22     | 4.12E-09    | 0.168998931 |
| ENSMUSG00000039519 | Cyp7b1    | 2.67E-39    | 11.18548868 |
| ENSMUSG00000039521 | Foxp3     | 1.06E-05    | 5.55426819  |
| ENSMUSG00000039543 | Cfap70    | 3.17E-09    | 0.226403547 |
| ENSMUSG00000039552 | Rsph4a    | 3.62E-10    | 0.247786076 |
| ENSMUSG00000039628 | Hs3st6    | 6.56E-05    | 0.229341369 |
| ENSMUSG00000039672 | Kcne2     | 6.28E-29    | 0.154386021 |
| ENSMUSG00000039720 | Got1l1    | 0.003562906 | 0.087640234 |
| ENSMUSG00000039753 | Fbx15     | 1.58E-23    | 4.297908244 |
| ENSMUSG00000039813 | Tbcd12    | 2.45E-27    | 4.234543882 |
| ENSMUSG00000039883 | Lrrc17    | 0.000616637 | 0.243811091 |
| ENSMUSG00000040017 | Saa4      | 8.26E-08    | 207.0149271 |
| ENSMUSG00000040026 | Saa3      | 0           | 2579.781229 |
| ENSMUSG00000040037 | Negr1     | 4.54E-07    | 0.114046755 |
| ENSMUSG00000040133 | Gpr176    | 1.33E-13    | 9.993582901 |
| ENSMUSG00000040181 | Fmo1      | 7.44E-24    | 0.222718782 |
| ENSMUSG00000040298 | Btbd16    | 4.77E-07    | 130.4019429 |
| ENSMUSG00000040328 | Olfir56   | 1.32E-05    | 13.46455861 |
| ENSMUSG00000040488 | Ltbp4     | 9.84E-14    | 0.160151042 |
| ENSMUSG00000040528 | Milr1     | 2.64E-30    | 7.116820768 |
| ENSMUSG00000040537 | Adam22    | 7.33E-10    | 0.178473882 |
| ENSMUSG00000040543 | Pitpnm3   | 1.03E-12    | 0.193850577 |
| ENSMUSG00000040552 | C3ar1     | 2.68E-39    | 11.81924819 |
| ENSMUSG00000040653 | Ppp1r14c  | 4.94E-13    | 0.235154052 |
| ENSMUSG00000040659 | Efh2      | 1.34E-21    | 4.303721775 |
| ENSMUSG00000040666 | Sh3bgr    | 2.72E-05    | 0.232255834 |
| ENSMUSG00000040703 | Cyp2s1    | 8.52E-19    | 0.242861265 |
| ENSMUSG00000040711 | Sh3pxd2b  | 8.29E-36    | 6.30501831  |
| ENSMUSG00000040740 | Slc25a34  | 0.006894436 | 0.217500992 |
| ENSMUSG00000040747 | Cd53      | 2.35E-47    | 10.12347324 |
| ENSMUSG00000040752 | Myh6      | 0.000241843 | 0.10771726  |
| ENSMUSG00000040808 | S100g     | 8.01E-18    | 0.172678564 |
| ENSMUSG00000040838 | Gm11639   | 1.00E-05    | 93.57545051 |
| ENSMUSG00000040855 | Reps2     | 3.12E-13    | 0.225803113 |
| ENSMUSG00000040896 | Kcnd3     | 0.000233464 | 0.179263474 |
| ENSMUSG00000040938 | Slc16a11  | 1.55E-13    | 0.200138078 |
| ENSMUSG00000040978 | Gm11992   | 1.45E-05    | 0.239955892 |
| ENSMUSG00000040998 | Npnt      | 2.53E-16    | 0.232989316 |
| ENSMUSG00000041202 | Pla2g2d   | 0.000227233 | 0.161455174 |
| ENSMUSG00000041323 | Ak7       | 1.90E-07    | 0.243070733 |
| ENSMUSG00000041324 | Inhba     | 2.04E-157   | 121.9329236 |
| ENSMUSG00000041347 | Bdkrb1    | 4.69E-07    | 5.093577732 |
| ENSMUSG00000041423 | Paqr6     | 2.61E-05    | 0.226259601 |
| ENSMUSG00000041449 | Serpina3h | 1.22E-10    | 7.886129271 |
| ENSMUSG00000041481 | Serpina3g | 1.45E-19    | 12.42020182 |
| ENSMUSG00000041523 | Upk2      | 0.001276687 | 0.088080358 |
| ENSMUSG00000041577 | Pre1p     | 8.16E-24    | 0.245166434 |
| ENSMUSG00000041608 | Entpd3    | 6.76E-06    | 4.490205681 |
| ENSMUSG00000041624 | Gucy1a2   | 1.84E-06    | 0.231400058 |
| ENSMUSG00000041644 | Slc5a12   | 1.29E-15    | 0.067321523 |

## List 1 continued

|                    |               |             |             |
|--------------------|---------------|-------------|-------------|
| ENSMUSG00000041754 | Trem3         | 2.87E-31    | 14.03368771 |
| ENSMUSG00000041827 | Oasl1         | 1.49E-05    | 16.86862713 |
| ENSMUSG00000041828 | Abca8a        | 7.14E-07    | 0.09744596  |
| ENSMUSG00000041842 | Fhdc1         | 2.55E-19    | 0.231049158 |
| ENSMUSG00000041930 | Fam222a       | 6.10E-09    | 0.222955388 |
| ENSMUSG00000041984 | Rptn          | 0.007756296 | 0.14353802  |
| ENSMUSG00000042109 | Csdc2         | 6.37E-06    | 0.166999964 |
| ENSMUSG00000042254 | Cilp          | 5.22E-05    | 0.18413199  |
| ENSMUSG00000042265 | Trem1         | 1.43E-34    | 30.16019343 |
| ENSMUSG00000042269 | Fam92b        | 7.12E-09    | 0.219081471 |
| ENSMUSG00000042306 | S100a14       | 1.44E-17    | 5.36093607  |
| ENSMUSG00000042349 | Ikbke         | 1.72E-60    | 14.93557055 |
| ENSMUSG00000042357 | Gjb5          | 6.04E-07    | 6.742242384 |
| ENSMUSG00000042359 | Osbp16        | 6.17E-24    | 0.176125736 |
| ENSMUSG00000042428 | Mgat3         | 1.13E-18    | 0.239692692 |
| ENSMUSG00000042433 | Pih1h3b       | 0.00181872  | 0.226866654 |
| ENSMUSG00000042529 | Kcnj12        | 6.86E-05    | 0.197216587 |
| ENSMUSG00000042607 | Asb4          | 1.11E-05    | 7.186961638 |
| ENSMUSG00000042638 | Gucy2c        | 5.51E-06    | 24.73971692 |
| ENSMUSG00000042677 | Zc3h12a       | 4.18E-42    | 8.245244821 |
| ENSMUSG00000042707 | Dnali1        | 8.66E-19    | 0.195140988 |
| ENSMUSG00000042750 | Bex2          | 9.07E-11    | 0.153209108 |
| ENSMUSG00000042759 | Apobr         | 1.79E-33    | 6.596238347 |
| ENSMUSG00000042793 | Lgr6          | 2.70E-07    | 0.148347672 |
| ENSMUSG00000042895 | Abra          | 0.000407372 | 0.175730743 |
| ENSMUSG00000043091 | Tuba1c        | 1.54E-16    | 4.594908828 |
| ENSMUSG00000043122 | A530016L24Rik | 0.001226696 | 0.02505651  |
| ENSMUSG00000043157 | Arl11         | 2.97E-17    | 6.430109722 |
| ENSMUSG00000043230 | Fam124b       | 0.00013873  | 0.201542513 |
| ENSMUSG00000043263 | Ifi209        | 0.008130874 | 4.253619333 |
| ENSMUSG00000043333 | Rhbd12        | 0.000204594 | 7.457430182 |
| ENSMUSG00000043383 | Olfrl342      | 0.009003851 | 0.153932791 |
| ENSMUSG00000043496 | Tril          | 2.05E-22    | 0.123317141 |
| ENSMUSG00000043613 | Mmp3          | 5.00E-28    | 4.538199291 |
| ENSMUSG00000043631 | Ecm2          | 1.33E-12    | 0.14508143  |
| ENSMUSG00000043635 | Adams3        | 7.44E-05    | 4.604960257 |
| ENSMUSG00000043705 | Capn13        | 0.000897689 | 0.082852402 |
| ENSMUSG00000043740 | B430306N03Rik | 1.72E-44    | 16.12684456 |
| ENSMUSG00000043939 | A530064D06Rik | 9.84E-15    | 7.014311983 |
| ENSMUSG00000043953 | Cerl2         | 7.88E-56    | 7.891245465 |
| ENSMUSG00000044062 | Plekhd1os     | 0.0057371   | 0.199674003 |
| ENSMUSG00000044103 | Il1f9         | 2.50E-25    | 87.98827565 |
| ENSMUSG00000044156 | Hepacam2      | 4.12E-10    | 0.109646117 |
| ENSMUSG00000044162 | Tnip3         | 7.00E-24    | 8.535845872 |
| ENSMUSG00000044165 | Bcl2l15       | 0.002943268 | 34.49678741 |
| ENSMUSG00000044244 | Il20rb        | 5.28E-08    | 4.560166123 |
| ENSMUSG00000044296 | Zfp879        | 0.003757747 | 0.239747077 |
| ENSMUSG00000044313 | Mab2113       | 5.71E-19    | 19.04627582 |
| ENSMUSG00000044338 | Aplnr         | 1.64E-17    | 0.186126388 |
| ENSMUSG00000044350 | Lacc1         | 2.62E-34    | 7.765066808 |
| ENSMUSG00000044352 | Sowaha        | 0.000802532 | 0.18377971  |
| ENSMUSG00000044365 | Cxxc4         | 2.29E-06    | 0.11928619  |
| ENSMUSG00000044461 | Shisa2        | 8.96E-05    | 0.241855363 |
| ENSMUSG00000044583 | Thr7          | 1.78E-27    | 5.566856379 |
| ENSMUSG00000044694 | 2010007H06Rik | 2.27E-06    | 0.219481196 |
| ENSMUSG00000044701 | Il27          | 7.98E-08    | 14.75646657 |
| ENSMUSG00000044726 | Erich5        | 0.003477193 | 0.049572166 |
| ENSMUSG00000044811 | Cd300c2       | 2.16E-16    | 4.905708874 |
| ENSMUSG00000044827 | Thr1          | 6.08E-13    | 4.456083979 |
| ENSMUSG00000044903 | Psg22         | 0.00046084  | 49.99361793 |
| ENSMUSG00000044951 | Mylk4         | 2.64E-05    | 0.051901524 |
| ENSMUSG00000044966 | Fbxo48        | 0.006742596 | 4.000577614 |
| ENSMUSG00000045027 | Prss22        | 2.14E-07    | 18.39268603 |
| ENSMUSG00000045036 | Tmem232       | 2.89E-07    | 0.207841673 |

## List 1 continued

|                    |               |             |             |
|--------------------|---------------|-------------|-------------|
| ENSMUSG00000045065 | 9930022D16Rik | 2.08E-16    | 88.42355775 |
| ENSMUSG00000045201 | Lrrc3b        | 0.002476668 | 0.021312817 |
| ENSMUSG00000045273 | Cenph         | 0.000682303 | 4.164926592 |
| ENSMUSG00000045312 | Lhfp12        | 1.64E-34    | 8.129817994 |
| ENSMUSG00000045349 | Sh2d5         | 2.57E-06    | 9.724104204 |
| ENSMUSG00000045362 | Tnfrsf26      | 2.97E-53    | 25.28811422 |
| ENSMUSG00000045381 | Olf433        | 0.004643729 | 8.296292642 |
| ENSMUSG00000045441 | Gprin3        | 8.27E-07    | 0.243893315 |
| ENSMUSG00000045502 | Hear2         | 9.33E-212   | 138.5769777 |
| ENSMUSG00000045514 | Olf460        | 0.001795713 | 24.64640914 |
| ENSMUSG00000045515 | Pou3f3        | 0.006551877 | 0.035810762 |
| ENSMUSG00000045551 | Fpr1          | 8.31E-21    | 12.20254813 |
| ENSMUSG00000045763 | Basp1         | 3.60E-43    | 16.2538563  |
| ENSMUSG00000045875 | Adra1a        | 7.29E-12    | 0.209171927 |
| ENSMUSG00000045915 | Ccdc42        | 1.38E-05    | 0.163779785 |
| ENSMUSG00000045954 | Cavin2        | 1.09E-30    | 0.230027205 |
| ENSMUSG00000046031 | Calhm6        | 7.21E-05    | 19.56552797 |
| ENSMUSG00000046093 | Hpcal4        | 1.41E-13    | 0.024406153 |
| ENSMUSG00000046182 | Gsg11         | 2.68E-08    | 0.048168686 |
| ENSMUSG00000046192 | Iqub          | 9.62E-07    | 0.2408964   |
| ENSMUSG00000046215 | Rprml         | 2.75E-10    | 0.082770314 |
| ENSMUSG00000046223 | Plaur         | 1.64E-27    | 5.663748295 |
| ENSMUSG00000046240 | Hepacam       | 8.16E-05    | 0.177073433 |
| ENSMUSG00000046242 | Nme9          | 7.19E-15    | 0.199190438 |
| ENSMUSG00000046245 | Pilra         | 1.04E-38    | 9.297041219 |
| ENSMUSG00000046610 | Oacyl         | 5.53E-09    | 11.94195793 |
| ENSMUSG00000046618 | Olfml2a       | 4.92E-18    | 0.15710071  |
| ENSMUSG00000046623 | Gjb4          | 3.50E-09    | 15.05386702 |
| ENSMUSG00000046687 | Gm5424        | 2.21E-17    | 4.816595069 |
| ENSMUSG00000046688 | Tifa          | 2.82E-31    | 7.42412298  |
| ENSMUSG00000046709 | Mapk10        | 0.009578329 | 0.164491613 |
| ENSMUSG00000046794 | Ppp1r3b       | 1.04E-16    | 4.32682149  |
| ENSMUSG00000046805 | Mpeg1         | 1.62E-84    | 9.881590982 |
| ENSMUSG00000046879 | Irgm1         | 0.000492428 | 7.21794108  |
| ENSMUSG00000046908 | Ltb4r1        | 1.67E-27    | 8.300897448 |
| ENSMUSG00000046997 | Spsb4         | 5.28E-10    | 9.838507269 |
| ENSMUSG00000047021 | Cfap65        | 3.41E-09    | 0.197371919 |
| ENSMUSG00000047104 | Pbp2          | 0.001528864 | 45.96921734 |
| ENSMUSG00000047230 | Cldn2         | 3.29E-09    | 10.84735298 |
| ENSMUSG00000047293 | Gpr15         | 0.004437941 | 4.253627291 |
| ENSMUSG00000047330 | Kene4         | 2.34E-26    | 6.726492462 |
| ENSMUSG00000047361 | Gm973         | 1.98E-07    | 0.213045755 |
| ENSMUSG00000047407 | Tgif1         | 7.10E-31    | 6.877402594 |
| ENSMUSG00000047415 | Gpr68         | 1.33E-09    | 4.421294143 |
| ENSMUSG00000047419 | Cmya5         | 7.53E-08    | 0.180750775 |
| ENSMUSG00000047443 | Erfe          | 2.02E-07    | 10.60548165 |
| ENSMUSG00000047517 | Dmbt1         | 3.94E-06    | 27.88389724 |
| ENSMUSG00000047562 | Mmp10         | 0.003411257 | 33.6517663  |
| ENSMUSG00000047592 | Nxpe5         | 2.36E-09    | 7.987501092 |
| ENSMUSG00000047773 | Ankfn1        | 7.62E-05    | 0.244273453 |
| ENSMUSG00000047798 | Cd300lf       | 2.41E-59    | 29.00270173 |
| ENSMUSG00000047810 | Ccdc88b       | 3.86E-39    | 9.982682017 |
| ENSMUSG00000047842 | Diras2        | 9.21E-17    | 0.148658547 |
| ENSMUSG00000047945 | Marcks11      | 1.92E-69    | 18.10556067 |
| ENSMUSG00000048038 | Ccdc187       | 5.06E-15    | 0.168650469 |
| ENSMUSG00000048040 | Arxs2         | 1.44E-10    | 0.209711555 |
| ENSMUSG00000048163 | Selplg        | 4.42E-21    | 4.196567136 |
| ENSMUSG00000048234 | Rnfl149       | 3.11E-41    | 13.12472412 |
| ENSMUSG00000048368 | Omd           | 2.79E-05    | 0.220021498 |
| ENSMUSG00000048480 | Cxcr1         | 6.01E-21    | 17.51575518 |
| ENSMUSG00000048621 | Gm6377        | 7.42E-20    | 11.36624798 |
| ENSMUSG00000048636 | A730049H05Rik | 6.71E-07    | 8.021468634 |
| ENSMUSG00000048721 | Fndc9         | 2.14E-05    | 7.227722166 |
| ENSMUSG00000048752 | Prss50        | 0.00715867  | 4.236749485 |

## List 1 continued

|                    |               |             |             |
|--------------------|---------------|-------------|-------------|
| ENSMUSG00000048779 | P2ry6         | 1.35E-20    | 4.69155845  |
| ENSMUSG00000048794 | Cfap100       | 2.46E-09    | 0.236404824 |
| ENSMUSG00000048834 | Vstm2a        | 2.26E-06    | 0.11650481  |
| ENSMUSG00000049037 | Clec4a1       | 2.42E-17    | 4.627917219 |
| ENSMUSG00000049130 | C5ar1         | 5.24E-33    | 10.20852667 |
| ENSMUSG00000049154 | Fam183b       | 3.64E-11    | 0.238182561 |
| ENSMUSG00000049303 | Syt12         | 2.02E-14    | 9.369363318 |
| ENSMUSG00000049511 | Htr1b         | 2.86E-07    | 0.119512462 |
| ENSMUSG00000049526 | Tmem202       | 0.000631548 | 4.115979817 |
| ENSMUSG00000049537 | Tecrl         | 0.002371432 | 0.247163359 |
| ENSMUSG00000049555 | Tmie          | 2.69E-11    | 0.163595375 |
| ENSMUSG00000049653 | Spatc1        | 0.00375636  | 8.84618821  |
| ENSMUSG00000049719 | Prss46        | 4.82E-05    | 70.36053199 |
| ENSMUSG00000049723 | Mmp12         | 1.93E-12    | 41.23436247 |
| ENSMUSG00000049848 | Ceacam19      | 0.006330621 | 8.934243284 |
| ENSMUSG00000049988 | Lrrc25        | 2.58E-31    | 9.127042402 |
| ENSMUSG00000050089 | Akap4         | 7.02E-09    | 154.155024  |
| ENSMUSG00000050097 | Ces2b         | 6.03E-06    | 0.130295888 |
| ENSMUSG00000050103 | Agmo          | 7.56E-13    | 0.18343753  |
| ENSMUSG00000050138 | Kenk12        | 1.78E-08    | 0.196140458 |
| ENSMUSG00000050222 | Ili17d        | 5.76E-12    | 0.239806508 |
| ENSMUSG00000050335 | Lgals3        | 3.72E-31    | 6.653885555 |
| ENSMUSG00000050359 | Sprr1a        | 8.12E-08    | 10.12654822 |
| ENSMUSG00000050370 | Ch25h         | 2.33E-22    | 14.69917653 |
| ENSMUSG00000050395 | Tnfsf15       | 1.52E-23    | 10.28317936 |
| ENSMUSG00000050439 | Enthd1        | 4.49E-11    | 474.4270426 |
| ENSMUSG00000050447 | Lypd6         | 0.000219429 | 0.112363009 |
| ENSMUSG00000050493 | Fam167b       | 0.000595798 | 4.442369756 |
| ENSMUSG00000050578 | Mmp13         | 3.37E-25    | 20.29990493 |
| ENSMUSG00000050721 | Plekho2       | 1.96E-50    | 5.952041508 |
| ENSMUSG00000050737 | Ptges         | 1.10E-28    | 7.178014443 |
| ENSMUSG00000050844 | 1700020N01Rik | 0.002197206 | 24.95410833 |
| ENSMUSG00000050896 | Rtn4rl2       | 2.56E-20    | 6.204235787 |
| ENSMUSG00000050908 | Tvp23a        | 3.02E-05    | 7.540378755 |
| ENSMUSG00000050931 | Sgms2         | 1.19E-25    | 9.891391024 |
| ENSMUSG00000050957 | Insl6         | 0.000214893 | 5.136598117 |
| ENSMUSG00000050966 | Lin28a        | 1.97E-05    | 10.14026938 |
| ENSMUSG00000050967 | Creg2         | 1.34E-11    | 10.03523711 |
| ENSMUSG00000051048 | P4ha3         | 1.95E-05    | 4.525089359 |
| ENSMUSG00000051367 | Six1          | 4.45E-07    | 0.194444467 |
| ENSMUSG00000051439 | Cd14          | 9.47E-48    | 32.52969399 |
| ENSMUSG00000051498 | Thr6          | 9.10E-39    | 15.85278282 |
| ENSMUSG00000051590 | Map3k19       | 1.12E-07    | 0.2067945   |
| ENSMUSG00000051606 | 2010001K21Rik | 7.00E-09    | 0.220005761 |
| ENSMUSG00000051682 | Trem14        | 1.11E-21    | 8.484072878 |
| ENSMUSG00000051726 | Kcnfl         | 0.000884772 | 0.124000212 |
| ENSMUSG00000051747 | Ttn           | 2.17E-06    | 0.189799951 |
| ENSMUSG00000051748 | Wfdc21        | 8.41E-27    | 16.18054827 |
| ENSMUSG00000051832 | E230016K23Rik | 5.20E-05    | 5.757620461 |
| ENSMUSG00000051839 | Gypa          | 0.001398362 | 0.061527622 |
| ENSMUSG00000051906 | Cd209f        | 1.36E-06    | 0.076787615 |
| ENSMUSG00000052102 | Gnpda1        | 6.60E-17    | 4.646664309 |
| ENSMUSG00000052131 | Akr1b7        | 9.26E-05    | 0.065382372 |
| ENSMUSG00000052188 | Gm14964       | 4.06E-10    | 0.140064342 |
| ENSMUSG00000052212 | Cd177         | 1.73E-23    | 12.64385641 |
| ENSMUSG00000052270 | Fpr2          | 9.85E-46    | 22.71223892 |
| ENSMUSG00000052353 | Cemip         | 3.31E-10    | 8.806747091 |
| ENSMUSG00000052435 | Cebpe         | 1.88E-07    | 6.908044706 |
| ENSMUSG00000052698 | Thn2          | 8.85E-17    | 0.201070587 |
| ENSMUSG00000052749 | Trim30b       | 8.03E-15    | 8.037264551 |
| ENSMUSG00000052776 | Oas1a         | 0.000328537 | 5.606946977 |
| ENSMUSG00000052837 | Junb          | 9.59E-40    | 7.718282616 |
| ENSMUSG00000052861 | Dnah6         | 1.36E-09    | 0.21067278  |
| ENSMUSG00000052974 | Cyp2f2        | 3.72E-37    | 0.065921921 |

## List 1 continued

|                    |               |             |             |
|--------------------|---------------|-------------|-------------|
| ENSMUSG00000053093 | Myh7          | 4.72E-17    | 0.188039063 |
| ENSMUSG00000053101 | Gpr141        | 1.20E-65    | 12.68313727 |
| ENSMUSG00000053111 | Fank1         | 1.50E-05    | 0.247905766 |
| ENSMUSG00000053113 | Socs3         | 1.28E-79    | 10.99452165 |
| ENSMUSG00000053161 | Daw1          | 0.000682899 | 0.182708394 |
| ENSMUSG00000053175 | Bel3          | 1.58E-17    | 4.430565758 |
| ENSMUSG00000053214 | Gm9899        | 0.000903813 | 0.234465965 |
| ENSMUSG00000053279 | Aldh1a1       | 4.18E-38    | 0.139655523 |
| ENSMUSG00000053318 | Slamf8        | 7.73E-08    | 21.19083721 |
| ENSMUSG00000053338 | Tarm1         | 1.68E-58    | 107.2002244 |
| ENSMUSG00000053442 | 4930597O21Rik | 0.009506524 | 28.90848827 |
| ENSMUSG00000053475 | Tnfaiip6      | 1.17E-05    | 4.947243573 |
| ENSMUSG00000053647 | Gper1         | 8.88E-05    | 0.201738905 |
| ENSMUSG00000054072 | Iigp1         | 0.002325063 | 10.28715664 |
| ENSMUSG00000054146 | Krt15         | 0.000370582 | 0.033706211 |
| ENSMUSG00000054169 | Ceacam10      | 1.21E-08    | 15.82935727 |
| ENSMUSG00000054203 | Ifi205        | 4.80E-06    | 18.37378853 |
| ENSMUSG00000054252 | Fgfr3         | 8.59E-16    | 0.219354915 |
| ENSMUSG00000054320 | Lrrc36        | 4.40E-06    | 0.238123786 |
| ENSMUSG00000054422 | Fabp1         | 3.30E-20    | 0.023984029 |
| ENSMUSG00000054459 | Vsnl1         | 9.01E-07    | 0.236074176 |
| ENSMUSG00000054477 | Kcmn2         | 1.90E-05    | 0.149418698 |
| ENSMUSG00000054520 | Sh3bp2        | 1.15E-49    | 6.662734482 |
| ENSMUSG00000054556 | Gm4876        | 0.00047324  | 0.200219757 |
| ENSMUSG00000054619 | Mettl7a1      | 5.63E-37    | 0.102317165 |
| ENSMUSG00000054855 | Rnd1          | 2.83E-12    | 4.206844444 |
| ENSMUSG00000054863 | Fam19a5       | 0.007935706 | 0.207279808 |
| ENSMUSG00000054905 | Stfa3         | 5.49E-18    | 322.9239368 |
| ENSMUSG00000054931 | Zkscan4       | 2.62E-05    | 0.228260384 |
| ENSMUSG00000054986 | Sec14l3       | 1.18E-26    | 0.201340829 |
| ENSMUSG00000055134 | 9130017K11Rik | 0.002838304 | 0.114070069 |
| ENSMUSG00000055170 | Ifng          | 5.81E-08    | 26.07460455 |
| ENSMUSG00000055301 | Adh7          | 9.71E-23    | 0.148688434 |
| ENSMUSG00000055368 | Slc6a2        | 1.40E-11    | 0.225910832 |
| ENSMUSG00000055430 | Nap1l5        | 0.006899193 | 0.153661197 |
| ENSMUSG00000055493 | Epm2a         | 8.52E-12    | 0.216168967 |
| ENSMUSG00000055541 | Lair1         | 4.23E-21    | 7.36898661  |
| ENSMUSG00000055629 | B4galnt4      | 5.44E-06    | 5.649988324 |
| ENSMUSG00000055676 | Gm5069        | 0.001072296 | 0.243775468 |
| ENSMUSG00000055733 | Nap1l3        | 1.50E-05    | 0.223796461 |
| ENSMUSG00000055805 | Fmn1l         | 1.80E-21    | 4.018090791 |
| ENSMUSG00000055976 | Cldn23        | 1.59E-06    | 0.207395857 |
| ENSMUSG00000055994 | Nod2          | 6.18E-14    | 5.488963417 |
| ENSMUSG00000056054 | S100a8        | 1.33E-08    | 22.40912127 |
| ENSMUSG00000056071 | S100a9        | 1.23E-07    | 15.03851638 |
| ENSMUSG00000056313 | Tcim          | 4.63E-16    | 0.244170353 |
| ENSMUSG00000056413 | Adap1         | 2.36E-20    | 4.152415147 |
| ENSMUSG00000056476 | Med12l        | 4.30E-09    | 4.607567602 |
| ENSMUSG00000056501 | Cebpb         | 7.22E-33    | 5.250149874 |
| ENSMUSG00000056508 | l700001K19Rik | 0.007736482 | 0.242304234 |
| ENSMUSG00000056529 | Ptafr         | 8.82E-150   | 50.60019052 |
| ENSMUSG00000056569 | Mpz           | 1.86E-05    | 0.181759836 |
| ENSMUSG00000056737 | Capg          | 1.71E-44    | 7.566459485 |
| ENSMUSG00000056749 | Nfil3         | 1.14E-16    | 6.677783513 |
| ENSMUSG00000056824 | Zfp663        | 0.001913504 | 0.10697289  |
| ENSMUSG00000056973 | Ces1d         | 6.79E-25    | 0.15193868  |
| ENSMUSG00000057060 | Slc35f3       | 1.34E-06    | 0.10471387  |
| ENSMUSG00000057074 | Ces1g         | 1.33E-19    | 0.061649057 |
| ENSMUSG00000057135 | Scimp         | 5.51E-15    | 6.436652407 |
| ENSMUSG00000057182 | Scn3a         | 6.83E-19    | 0.13966351  |
| ENSMUSG00000057191 | AB124611      | 2.30E-32    | 5.232883525 |
| ENSMUSG00000057265 | Bbofl         | 1.45E-06    | 0.244638914 |
| ENSMUSG00000057286 | St6galnac2    | 1.97E-17    | 0.245559608 |
| ENSMUSG00000057346 | Apol9a        | 6.02E-05    | 4.616692063 |

## List 1 continued

|                    |               |             |             |
|--------------------|---------------|-------------|-------------|
| ENSMUSG00000057378 | Ryr3          | 0.002856392 | 0.14700545  |
| ENSMUSG00000057465 | Saa2          | 1.50E-14    | 390.6209695 |
| ENSMUSG00000057606 | Colq          | 1.17E-46    | 0.02647835  |
| ENSMUSG00000057715 | A830018L16Rik | 0.000226484 | 0.22779101  |
| ENSMUSG00000057716 | Tmem178b      | 0.005811587 | 0.120634507 |
| ENSMUSG00000057897 | Camk2b        | 1.63E-05    | 0.228128263 |
| ENSMUSG00000057933 | Gsta2         | 2.19E-17    | 0.048290108 |
| ENSMUSG00000058046 | 4933430I17Rik | 0.0017542   | 5.15118999  |
| ENSMUSG00000058057 | Mettl7a3      | 0.00559868  | 0.051791853 |
| ENSMUSG00000058145 | Adams17       | 1.16E-05    | 0.234186932 |
| ENSMUSG00000058159 | T2            | 0.002795458 | 0.099436358 |
| ENSMUSG00000058427 | Cxcl2         | 5.98E-33    | 3289.780123 |
| ENSMUSG00000058624 | Gda           | 1.02E-30    | 6.891348411 |
| ENSMUSG00000058715 | Fcer1g        | 1.36E-58    | 11.21108856 |
| ENSMUSG00000058755 | Osm           | 1.93E-43    | 50.58503118 |
| ENSMUSG00000058818 | Pirb          | 3.30E-35    | 7.259812016 |
| ENSMUSG00000058869 | Gm4832        | 1.68E-06    | 456.6626574 |
| ENSMUSG00000058914 | C1qtnf3       | 9.86E-07    | 0.040231638 |
| ENSMUSG00000058921 | Slc10a5       | 2.46E-11    | 0.081824546 |
| ENSMUSG00000059040 | Eno1b         | 3.09E-18    | 6.659071925 |
| ENSMUSG00000059089 | Fcgr4         | 8.49E-22    | 10.04614992 |
| ENSMUSG00000059108 | Ifitm6        | 1.14E-17    | 8.9556364   |
| ENSMUSG00000059325 | Hopx          | 6.40E-16    | 0.246344501 |
| ENSMUSG00000059326 | Csf2ra        | 1.19E-34    | 6.914193096 |
| ENSMUSG00000059463 | Spag11b       | 0.007123395 | 0.051105257 |
| ENSMUSG00000059479 | B3gnt8        | 5.12E-09    | 4.045921302 |
| ENSMUSG00000059498 | Fcgr3         | 2.10E-35    | 8.366832697 |
| ENSMUSG00000059562 | Ccdc154       | 6.80E-07    | 0.246722657 |
| ENSMUSG00000059657 | Stfa21l       | 5.10E-11    | 38.46249066 |
| ENSMUSG00000059741 | Myl3          | 0.000182084 | 0.073438038 |
| ENSMUSG00000059854 | Hydin         | 4.14E-10    | 0.182596109 |
| ENSMUSG00000060063 | Alox5ap       | 7.48E-15    | 5.287627501 |
| ENSMUSG00000060131 | Atp8b4        | 5.25E-38    | 7.963510313 |
| ENSMUSG00000060176 | Kif27         | 3.03E-10    | 0.20426975  |
| ENSMUSG00000060183 | Cxcl11        | 1.41E-05    | 1333.409081 |
| ENSMUSG00000060212 | Pcnx2         | 0.00067596  | 4.304512994 |
| ENSMUSG00000060402 | Chst8         | 0.000980572 | 0.229049237 |
| ENSMUSG00000060445 | Sycp2         | 3.47E-08    | 7.575300128 |
| ENSMUSG00000060459 | Kng2          | 8.16E-10    | 13.25224157 |
| ENSMUSG00000060477 | Irak2         | 3.37E-23    | 4.371532536 |
| ENSMUSG00000060639 | Hist1h4i      | 2.40E-06    | 4.837176693 |
| ENSMUSG00000061080 | Lsamp         | 0.000810875 | 0.023594852 |
| ENSMUSG00000061086 | Myl4          | 0.00334921  | 0.193133342 |
| ENSMUSG00000061100 | Retnla        | 1.63E-45    | 18.11961478 |
| ENSMUSG00000061175 | Fnip2         | 1.03E-23    | 7.917604182 |
| ENSMUSG00000061397 | Krt79         | 2.52E-09    | 0.233844395 |
| ENSMUSG00000061462 | Obscn         | 9.76E-06    | 0.162171164 |
| ENSMUSG00000061540 | Orm2          | 4.41E-24    | 40.71579755 |
| ENSMUSG00000061576 | Dpp6          | 2.52E-05    | 0.064993648 |
| ENSMUSG00000061601 | Pclo          | 3.44E-08    | 0.167675595 |
| ENSMUSG00000061718 | Ppp1r1b       | 1.44E-14    | 0.162034749 |
| ENSMUSG00000061780 | Cfd           | 1.14E-08    | 0.054788887 |
| ENSMUSG00000061816 | Myl1          | 0.004797594 | 0.095753092 |
| ENSMUSG00000061959 | Ces1e         | 4.02E-21    | 0.080776986 |
| ENSMUSG00000062070 | Pgk1          | 7.64E-14    | 4.01144606  |
| ENSMUSG00000062148 | Ear6          | 7.93E-08    | 35.79302375 |
| ENSMUSG00000062184 | Hs6st2        | 8.82E-06    | 0.233375519 |
| ENSMUSG00000062257 | Opcml         | 0.002912244 | 0.06717629  |
| ENSMUSG00000062309 | Rpp25         | 0.003741312 | 4.484355234 |
| ENSMUSG00000062310 | Glp1          | 4.80E-05    | 67.80266802 |
| ENSMUSG00000062329 | Cytl1         | 3.15E-37    | 0.052090868 |
| ENSMUSG00000062345 | Serpib2       | 6.54E-20    | 25.83424101 |
| ENSMUSG00000062380 | Tubb3         | 2.42E-13    | 12.59836285 |
| ENSMUSG00000062382 | Ftl1-ps1      | 3.18E-12    | 4.353748309 |

## List 1 continued

|                    |               |             |             |
|--------------------|---------------|-------------|-------------|
| ENSMUSG00000062480 | Acat3         | 2.66E-09    | 12.91404594 |
| ENSMUSG00000062563 | Cys1          | 1.07E-13    | 0.123567703 |
| ENSMUSG00000062980 | Cped1         | 6.08E-27    | 0.232695126 |
| ENSMUSG00000063130 | Calm3         | 1.71E-12    | 0.052703411 |
| ENSMUSG00000063234 | Gpr84         | 8.96E-21    | 1317.76256  |
| ENSMUSG00000063239 | Grm4          | 0.000310641 | 0.134419237 |
| ENSMUSG00000063260 | Syt10         | 0.000171379 | 0.190508401 |
| ENSMUSG00000063388 | BC023105      | 0.001270035 | 18.89143822 |
| ENSMUSG00000063428 | Ddo           | 9.22E-12    | 0.247159552 |
| ENSMUSG00000063524 | Eno1          | 2.48E-27    | 6.492156825 |
| ENSMUSG00000063529 | Stmnd1        | 8.17E-06    | 0.233860755 |
| ENSMUSG00000063623 | C230062I16Rik | 3.57E-06    | 0.150726046 |
| ENSMUSG00000063626 | Unc5d         | 0.000166992 | 0.052800718 |
| ENSMUSG00000063632 | Sox11         | 3.09E-17    | 0.127798219 |
| ENSMUSG00000063681 | Crb1          | 0.00155407  | 0.142901619 |
| ENSMUSG00000064115 | Cadm2         | 0.000173837 | 0.0955919   |
| ENSMUSG00000064193 | Gm4735        | 3.41E-08    | 4.560089437 |
| ENSMUSG00000064225 | Paqr9         | 0.009670562 | 0.105406342 |
| ENSMUSG00000064267 | Hven1         | 3.47E-30    | 5.447544298 |
| ENSMUSG00000064293 | Cntn4         | 0.00334057  | 0.032609768 |
| ENSMUSG00000064294 | Aox3          | 4.08E-22    | 0.177483273 |
| ENSMUSG00000064350 | mt-Ty         | 7.39E-07    | 0.188243454 |
| ENSMUSG00000065037 | Rn7sk         | 8.16E-07    | 11.71086304 |
| ENSMUSG00000065420 | Mir142b       | 0.000857586 | 8.307859565 |
| ENSMUSG00000065987 | Cd209b        | 0.00128219  | 0.080885798 |
| ENSMUSG00000066319 | Rtp3          | 1.22E-07    | 0.165579045 |
| ENSMUSG00000066363 | Serpina3f     | 1.22E-10    | 26.4246655  |
| ENSMUSG00000066438 | Plekhd1       | 1.12E-10    | 0.21699444  |
| ENSMUSG00000066632 | Pgk1-rs7      | 0.000195496 | 5.571275845 |
| ENSMUSG00000066682 | Pilrb2        | 3.69E-27    | 7.303509266 |
| ENSMUSG00000066684 | Pilrb1        | 1.50E-43    | 11.12816601 |
| ENSMUSG00000066861 | Oas1g         | 0.001333974 | 7.943615309 |
| ENSMUSG00000067049 | Unc93a        | 0.000682741 | 46.59621532 |
| ENSMUSG00000067577 | A430093F15Rik | 0.003686757 | 4.395249052 |
| ENSMUSG00000067642 | Adgrf3        | 0.007797008 | 27.70786053 |
| ENSMUSG00000067916 | Zfp991        | 2.72E-12    | 4.722784175 |
| ENSMUSG00000068263 | Efcc1         | 4.13E-13    | 0.098555974 |
| ENSMUSG00000068323 | Slc4a5        | 2.11E-21    | 0.158951014 |
| ENSMUSG00000068417 | Pnp2          | 2.90E-09    | 5.038943197 |
| ENSMUSG00000068522 | Aard          | 1.34E-13    | 0.222569634 |
| ENSMUSG00000068606 | Gm4841        | 0.000223656 | 21.05536191 |
| ENSMUSG00000068614 | Actc1         | 0.0001131   | 0.094453962 |
| ENSMUSG00000068745 | Mybphl        | 0.000188177 | 0.123810315 |
| ENSMUSG00000068957 | 4930589L23Rik | 7.80E-07    | 179.4535101 |
| ENSMUSG00000069170 | Adgrv1        | 0.000621699 | 0.248653777 |
| ENSMUSG00000069792 | Wfdc17        | 4.05E-38    | 26.39693598 |
| ENSMUSG00000069793 | Slfn9         | 6.73E-05    | 8.494037542 |
| ENSMUSG00000069830 | Nlrp1a        | 1.95E-05    | 4.067457118 |
| ENSMUSG00000069873 | 4930438A08Rik | 0.000182692 | 23.50902031 |
| ENSMUSG00000069910 | Spdl1         | 4.32E-10    | 5.461773145 |
| ENSMUSG00000070427 | Il18bp        | 2.37E-20    | 12.37359639 |
| ENSMUSG00000070524 | Fcrlb         | 2.99E-37    | 81.89828012 |
| ENSMUSG00000070529 | Wfdc10        | 0.001614944 | 0.068427617 |
| ENSMUSG00000070605 | Zfp992        | 1.51E-05    | 4.009860003 |
| ENSMUSG00000071230 | Npw           | 6.83E-16    | 0.143401001 |
| ENSMUSG00000071311 | Gpr31b        | 0.002756666 | 12.28166985 |
| ENSMUSG00000071324 | Armc2         | 4.97E-05    | 0.245928438 |
| ENSMUSG00000071550 | Cfap44        | 3.62E-07    | 0.220245279 |
| ENSMUSG00000071552 | Tigit         | 6.11E-06    | 4.709309071 |
| ENSMUSG00000071561 | BC100530      | 2.76E-05    | 116.2072778 |
| ENSMUSG00000071562 | Stfa1         | 6.08E-12    | 74.85937808 |
| ENSMUSG00000071604 | Fam189a2      | 4.59E-15    | 0.163581583 |
| ENSMUSG00000071713 | Csf2rb        | 3.75E-94    | 14.89014276 |
| ENSMUSG00000071714 | Csf2rb2       | 1.23E-114   | 29.75729529 |



## List 1 continued

|                    |               |             |             |
|--------------------|---------------|-------------|-------------|
| ENSMUSG00000071715 | Ncf4          | 9.96E-41    | 12.89454114 |
| ENSMUSG00000071719 | Tmem28        | 3.30E-07    | 0.107970413 |
| ENSMUSG00000072473 | l700024G13Rik | 2.72E-16    | 0.125294526 |
| ENSMUSG00000072572 | Slc39a2       | 6.51E-07    | 4.242241353 |
| ENSMUSG00000072601 | Ear1          | 0.007162195 | 0.219583361 |
| ENSMUSG00000072620 | Slfn2         | 1.19E-49    | 9.515633288 |
| ENSMUSG00000072621 | Slfn10-ps     | 5.30E-22    | 15.29639638 |
| ENSMUSG00000072844 | G530011O06Rik | 5.59E-05    | 18.33122749 |
| ENSMUSG00000072949 | Acot1         | 6.34E-11    | 0.153555039 |
| ENSMUSG00000072966 | Gprasp2       | 0.000942512 | 0.18828071  |
| ENSMUSG00000073102 | Drc1          | 7.38E-14    | 0.223197196 |
| ENSMUSG00000073208 | Speer4c       | 0.002078244 | 7.254267546 |
| ENSMUSG00000073274 | Gm14636       | 8.62E-05    | 19.58160788 |
| ENSMUSG00000073293 | Nudt10        | 0.000118187 | 0.122726243 |
| ENSMUSG00000073386 | 9830107B12Rik | 1.54E-05    | 5.719867464 |
| ENSMUSG00000073400 | Trim10        | 0.005919264 | 0.081780848 |
| ENSMUSG00000073412 | Lst1          | 5.84E-27    | 7.009260423 |
| ENSMUSG00000073424 | Cyp4f15       | 1.87E-11    | 0.169142906 |
| ENSMUSG00000073489 | Ifi204        | 1.07E-08    | 22.83063086 |
| ENSMUSG00000073490 | Ifi207        | 9.59E-18    | 9.171614778 |
| ENSMUSG00000073492 | Gm10521       | 7.06E-05    | 4.546629025 |
| ENSMUSG00000073529 | F830208F22Rik | 1.21E-11    | 30.17878295 |
| ENSMUSG00000073598 | l700066B19Rik | 1.92E-07    | 8.051008233 |
| ENSMUSG00000073600 | Prob1         | 2.58E-14    | 0.248537754 |
| ENSMUSG00000073771 | Btbd19        | 1.97E-07    | 4.003922514 |
| ENSMUSG00000074063 | Osgin1        | 2.75E-11    | 4.523556273 |
| ENSMUSG00000074115 | Saa1          | 1.17E-41    | 549.6981917 |
| ENSMUSG00000074151 | Nlrc5         | 0.000253384 | 5.611791825 |
| ENSMUSG00000074217 | 2210011C24Rik | 3.95E-37    | 0.111284589 |
| ENSMUSG00000074342 | l830077J02Rik | 2.45E-11    | 4.24972395  |
| ENSMUSG00000074417 | Gm14548       | 4.15E-25    | 17.90386886 |
| ENSMUSG00000074419 | Gm15448       | 8.75E-12    | 6.573903188 |
| ENSMUSG00000074505 | Fat3          | 1.45E-07    | 0.209933866 |
| ENSMUSG00000074595 | Wfdc6a        | 0.000208071 | 0.152496862 |
| ENSMUSG00000074622 | Mafb          | 1.71E-28    | 5.076215718 |
| ENSMUSG00000074673 | Ttl9          | 0.000583106 | 0.202534965 |
| ENSMUSG00000074677 | Sirpb1c       | 1.33E-20    | 5.297861851 |
| ENSMUSG00000074743 | Thbd          | 2.96E-28    | 0.208622012 |
| ENSMUSG00000074802 | Gas2l3        | 9.62E-35    | 11.80216154 |
| ENSMUSG00000074805 | Ill1bos       | 4.18E-05    | 6.33207195  |
| ENSMUSG00000074813 | Gm14005       | 5.51E-27    | 8.726729512 |
| ENSMUSG00000074818 | Pdzd7         | 1.55E-08    | 0.175822678 |
| ENSMUSG00000074971 | Fibin         | 3.86E-17    | 0.231757789 |
| ENSMUSG00000074981 | Dcdc5         | 2.09E-05    | 0.08519531  |
| ENSMUSG00000075010 | AW112010      | 1.09E-07    | 4.406274907 |
| ENSMUSG00000075122 | Cd80          | 3.72E-36    | 12.52559374 |
| ENSMUSG00000075605 | Slurp2        | 0.004126569 | 0.16696495  |
| ENSMUSG00000075705 | Msrb1         | 5.76E-30    | 5.79092169  |
| ENSMUSG00000076441 | Ass1          | 1.25E-37    | 7.63066292  |
| ENSMUSG00000076614 | Ighg1         | 7.69E-08    | 5.6577588   |
| ENSMUSG00000078117 | Gm16485       | 9.20E-05    | 0.063179994 |
| ENSMUSG00000078122 | F630028O10Rik | 1.60E-17    | 8.978357261 |
| ENSMUSG00000078137 | Ankrd63       | 6.35E-24    | 0.143948768 |
| ENSMUSG00000078144 | Capns2        | 0.00630374  | 13.90251569 |
| ENSMUSG00000078238 | Gm12854       | 1.66E-06    | 4.663796837 |
| ENSMUSG00000078252 | Krtap17-1     | 2.98E-09    | 0.003470597 |
| ENSMUSG00000078300 | Gm2606        | 0.000358607 | 6.330691744 |
| ENSMUSG00000078452 | Raet1d        | 8.92E-11    | 33.40262913 |
| ENSMUSG00000078487 | Ankrd65       | 1.00E-07    | 0.180105066 |
| ENSMUSG00000078597 | Cyp4a12b      | 4.41E-06    | 0.008482238 |
| ENSMUSG00000078607 | l810010H24Rik | 1.62E-18    | 0.153504024 |
| ENSMUSG00000078640 | Gm11627       | 1.01E-05    | 0.146715004 |
| ENSMUSG00000078763 | Slfn1         | 1.86E-49    | 13.64316537 |
| ENSMUSG00000078783 | Gm9733        | 2.96E-08    | 4.700509378 |

## List 1 continued

|                    |               |             |             |
|--------------------|---------------|-------------|-------------|
| ENSMUSG00000078920 | Ifi47         | 0.003424994 | 5.890672666 |
| ENSMUSG00000078922 | Tgtp1         | 0.001275864 | 14.458936   |
| ENSMUSG00000078945 | Naip2         | 2.29E-38    | 11.03967405 |
| ENSMUSG00000079012 | Serpina3m     | 5.74E-52    | 21.6927426  |
| ENSMUSG00000079014 | Serpina3i     | 1.99E-29    | 23.77609017 |
| ENSMUSG00000079022 | Col22a1       | 0.000236506 | 8.789754456 |
| ENSMUSG00000079049 | Serpina1c     | 0.003097793 | 10.36017    |
| ENSMUSG00000079101 | Esd-ps        | 8.65E-05    | 13.4391246  |
| ENSMUSG00000079168 | Cd209g        | 0.001454217 | 0.042797306 |
| ENSMUSG00000079186 | Gzmc          | 0.005478424 | 13.75764573 |
| ENSMUSG00000079227 | Ccr5          | 3.33E-22    | 10.97226013 |
| ENSMUSG00000079293 | Clec7a        | 1.93E-38    | 9.924442195 |
| ENSMUSG00000079330 | Lemdl         | 0.002883503 | 10.17836803 |
| ENSMUSG00000079343 | C1s2          | 0.001455604 | 45.13768938 |
| ENSMUSG00000079355 | Ackr4         | 9.15E-11    | 0.117509765 |
| ENSMUSG00000079419 | Ms4a6c        | 1.24E-29    | 7.779985392 |
| ENSMUSG00000079434 | Neu2          | 9.20E-05    | 0.168224147 |
| ENSMUSG00000079436 | Kcnj13        | 0.000100583 | 0.212977408 |
| ENSMUSG00000079584 | Gm364         | 0.002185792 | 55.17889033 |
| ENSMUSG00000079597 | Gm5483        | 4.22E-08    | 59.89311278 |
| ENSMUSG00000079625 | Tm4sf19       | 1.37E-14    | 169.750389  |
| ENSMUSG00000079700 | Fpr3          | 4.67E-09    | 276.7631472 |
| ENSMUSG00000079722 | Till2         | 0.009152523 | 42.59688843 |
| ENSMUSG00000080242 | Atp6v0c-ps2   | 1.09E-05    | 5.456412084 |
| ENSMUSG00000080783 | Gm8250        | 0.000493256 | 6.74718138  |
| ENSMUSG00000081058 | Hist2h3c2     | 0.00153078  | 0.218501492 |
| ENSMUSG00000081650 | Gm16181       | 2.56E-08    | 12.2105179  |
| ENSMUSG00000081664 | Gm15544       | 0.00085286  | 42.97431612 |
| ENSMUSG00000081665 | Gm15922       | 1.13E-18    | 13.44593032 |
| ENSMUSG00000081723 | Gm15931       | 3.71E-13    | 8.2025798   |
| ENSMUSG00000082016 | Pgam1-ps2     | 1.36E-05    | 5.97655042  |
| ENSMUSG00000082292 | Gm12250       | 0.002501599 | 10.44464094 |
| ENSMUSG00000082419 | Gm11425       | 1.51E-07    | 11.65716111 |
| ENSMUSG00000082976 | Gm15056       | 1.55E-07    | 189.4794036 |
| ENSMUSG00000083041 | Gmfg-ps       | 0.004695709 | 7.746805579 |
| ENSMUSG00000083282 | Ctsf          | 7.27E-17    | 0.188570404 |
| ENSMUSG00000083773 | Gm13394       | 4.82E-05    | 5.153988133 |
| ENSMUSG00000083849 | Gm13477       | 0.008888343 | 5.105522032 |
| ENSMUSG00000084350 | Znf41-ps      | 2.69E-10    | 4.829294726 |
| ENSMUSG00000084497 | Gm22107       | 7.28E-05    | 10.3792951  |
| ENSMUSG00000084796 | Mir142hg      | 1.40E-09    | 4.604759676 |
| ENSMUSG00000084902 | Gm281         | 2.32E-12    | 0.133838281 |
| ENSMUSG00000084918 | Gm12708       | 0.001929845 | 6.991106528 |
| ENSMUSG00000084939 | Gm830         | 1.11E-05    | 0.116819194 |
| ENSMUSG00000084941 | Gm11944       | 4.56E-05    | 0.135166656 |
| ENSMUSG00000084960 | B430010I23Rik | 1.00E-10    | 0.19977518  |
| ENSMUSG00000084989 | Croce2        | 1.12E-06    | 0.175726833 |
| ENSMUSG00000085069 | Gm13111       | 2.45E-19    | 0.129015555 |
| ENSMUSG00000085124 | Gm12766       | 0.006096452 | 0.177197285 |
| ENSMUSG00000085126 | Gm12589       | 0.000191873 | 13.31878152 |
| ENSMUSG00000085156 | Snhg15        | 1.18E-09    | 4.274747617 |
| ENSMUSG00000085295 | 4930430E12Rik | 1.23E-38    | 548.5327233 |
| ENSMUSG00000085298 | F730035M05Rik | 0.001484579 | 64.71459971 |
| ENSMUSG00000085407 | I700095J03Rik | 0.001204862 | 0.110848706 |
| ENSMUSG00000085498 | Gm14023       | 2.70E-08    | 8.602860772 |
| ENSMUSG00000085514 | Beas3os2      | 0.002600423 | 0.175218953 |
| ENSMUSG00000085517 | Gm12963       | 0.002246649 | 0.24723563  |
| ENSMUSG00000085531 | Slc36a3os     | 5.12E-09    | 12.21348864 |
| ENSMUSG00000085558 | 4930412C18Rik | 1.74E-05    | 0.222413071 |
| ENSMUSG00000085682 | Gm14267       | 0.001828369 | 52.72039313 |
| ENSMUSG00000085894 | Gm15832       | 1.16E-24    | 11.44279243 |
| ENSMUSG00000085903 | Gm15340       | 5.23E-05    | 102.2507404 |
| ENSMUSG00000085915 | Gm8091        | 4.57E-05    | 14.62560707 |
| ENSMUSG00000085939 | Cd63-ps       | 2.88E-18    | 4.574897268 |

## List 1 continued

|                    |               |             |             |
|--------------------|---------------|-------------|-------------|
| ENSMUSG00000085976 | Gm13816       | 6.31E-05    | 0.205264684 |
| ENSMUSG00000085977 | Gm5970        | 1.59E-06    | 23.51914619 |
| ENSMUSG00000086109 | Gm13391       | 1.18E-07    | 28.6894943  |
| ENSMUSG00000086141 | 9030622O22Rik | 1.61E-05    | 0.219465786 |
| ENSMUSG00000086150 | Bach2os       | 0.001200853 | 12.54206267 |
| ENSMUSG00000086196 | Gm13571       | 2.56E-11    | 472.6143822 |
| ENSMUSG00000086335 | Gm12107       | 0.00017558  | 35.47179668 |
| ENSMUSG00000086499 | Gm16217       | 0.003371975 | 47.89603938 |
| ENSMUSG00000086727 | 4931428L18Rik | 0.003119085 | 28.72117344 |
| ENSMUSG00000086755 | Gm11216       | 0.00013093  | 82.0423011  |
| ENSMUSG00000086822 | 5330413P13Rik | 0.000375892 | 0.240149523 |
| ENSMUSG00000086843 | E030013I19Rik | 2.45E-11    | 0.104169103 |
| ENSMUSG00000086868 | Gm15883       | 7.18E-09    | 0.076885287 |
| ENSMUSG00000086952 | Gm12596       | 0.000370736 | 49.71802183 |
| ENSMUSG00000087001 | Gm15475       | 9.62E-07    | 0.108877137 |
| ENSMUSG00000087113 | Gm11714       | 0.000982036 | 18.7765416  |
| ENSMUSG00000087263 | Gm15726       | 0.002500398 | 18.51734404 |
| ENSMUSG00000087477 | Gm13822       | 5.62E-08    | 10.91006539 |
| ENSMUSG00000087624 | 9230111E07Rik | 0.000127355 | 6.101609676 |
| ENSMUSG00000089712 | Gm15889       | 3.78E-06    | 0.201364131 |
| ENSMUSG00000089844 | A530032D15Rik | 0.004160137 | 5.452292384 |
| ENSMUSG00000089874 | 9230117E06Rik | 0.000127413 | 0.140465861 |
| ENSMUSG00000089929 | Bcl2a1b       | 1.43E-65    | 15.44641615 |
| ENSMUSG00000089931 | Gm8459        | 5.94E-05    | 45.48857817 |
| ENSMUSG00000089942 | Pira2         | 1.69E-24    | 13.87308801 |
| ENSMUSG00000089999 | Gm6485        | 9.31E-06    | 4.871133323 |
| ENSMUSG00000090124 | Ugt1a7c       | 7.07E-18    | 10.11909104 |
| ENSMUSG00000090173 | Fbxw10        | 0.000275683 | 4.179919357 |
| ENSMUSG00000090192 | Gm16556       | 0.006541546 | 4.548780015 |
| ENSMUSG00000090230 | Gm16315       | 7.90E-05    | 19.60547242 |
| ENSMUSG00000090231 | Cfb           | 3.31E-26    | 11.91708958 |
| ENSMUSG00000090257 | Gm4524        | 7.48E-06    | 0.064748871 |
| ENSMUSG00000090291 | Lrrc10b       | 2.41E-08    | 0.242937661 |
| ENSMUSG00000090307 | 1700071M16Rik | 7.96E-16    | 21.45135786 |
| ENSMUSG00000090379 | Gm8229        | 8.62E-05    | 0.011717731 |
| ENSMUSG00000090439 | Gm17455       | 0.002574262 | 10.78402393 |
| ENSMUSG00000090564 | A430057M04Rik | 0.000202728 | 14.08212978 |
| ENSMUSG00000090576 | Gm17055       | 5.68E-05    | 5.290380468 |
| ENSMUSG00000090799 | Klh133        | 0.001713993 | 0.225753473 |
| ENSMUSG00000091230 | Gm6970        | 0.00383077  | 0.197239733 |
| ENSMUSG00000091415 | Ak9           | 9.00E-07    | 0.233892704 |
| ENSMUSG00000091618 | H60c          | 2.42E-05    | 0.047169304 |
| ENSMUSG00000091712 | Sec14I5       | 1.40E-06    | 0.165734366 |
| ENSMUSG00000091730 | Gm17230       | 5.42E-05    | 27.14642907 |
| ENSMUSG00000092171 | 4833427F10Rik | 0.001979743 | 7.276220243 |
| ENSMUSG00000092418 | Gm20406       | 1.06E-06    | 38.77691142 |
| ENSMUSG00000092517 | Art2a-ps      | 0.001917759 | 5.736122692 |
| ENSMUSG00000093384 | Gm20689       | 0.005771566 | 4.468862951 |
| ENSMUSG00000093622 | Gm20703       | 0.003573618 | 10.5812763  |
| ENSMUSG00000093765 | Gm20658       | 5.03E-05    | 12.60076779 |
| ENSMUSG00000093954 | Gm16867       | 6.27E-11    | 7.135988751 |
| ENSMUSG00000093973 | Mrgpra2a      | 2.57E-09    | 316.9026597 |
| ENSMUSG00000094504 | Gm5294        | 0.005614743 | 41.95897298 |
| ENSMUSG00000094626 | Tmem121b      | 1.29E-07    | 0.137979958 |
| ENSMUSG00000094707 | A830019P07Rik | 0.005748778 | 0.024778665 |
| ENSMUSG00000094733 | Gm5416        | 6.61E-08    | 34.33204922 |
| ENSMUSG00000095028 | Sirpb1b       | 1.59E-16    | 6.244355992 |
| ENSMUSG00000095061 | E030018B13Rik | 0.002186476 | 13.34282383 |
| ENSMUSG00000095134 | Mid1-ps1      | 0.000524448 | 81.61759122 |
| ENSMUSG00000095493 | A630023A22Rik | 0.000511563 | 62.73934801 |
| ENSMUSG00000095576 | Fmo6          | 0.001616288 | 0.074696879 |
| ENSMUSG00000095609 | Gm21188       | 1.73E-28    | 7.777957921 |
| ENSMUSG00000095620 | 2010005H15Rik | 5.07E-08    | 32.62064874 |
| ENSMUSG00000095788 | Sirpb1a       | 2.91E-14    | 4.193884437 |

## List 1 continued

|                    |               |             |             |
|--------------------|---------------|-------------|-------------|
| ENSMUSG00000096141 | Dnah7a        | 3.94E-06    | 0.237861    |
| ENSMUSG00000096617 | Gm5559        | 6.73E-11    | 4.261875954 |
| ENSMUSG00000096719 | Mrgpra2b      | 3.64E-21    | 71.0739483  |
| ENSMUSG00000096768 | Gm47283       | 0.00260737  | 6.008347669 |
| ENSMUSG00000096960 | A230028O05Rik | 0.002948083 | 47.77617509 |
| ENSMUSG00000096965 | 3300005D01Rik | 0.000581305 | 15.46044498 |
| ENSMUSG00000097077 | Gm16712       | 0.001625938 | 12.70626949 |
| ENSMUSG00000097134 | 1110002J07Rik | 4.21E-09    | 20.68132814 |
| ENSMUSG00000097139 | Gm26626       | 5.26E-09    | 63.84590307 |
| ENSMUSG00000097178 | 2310002F09Rik | 0.001126351 | 0.061105524 |
| ENSMUSG00000097194 | 9330175E14Rik | 1.67E-07    | 6.981831924 |
| ENSMUSG00000097203 | 4732419C18Rik | 0.003317685 | 16.0150919  |
| ENSMUSG00000097236 | 4831440E17Rik | 0.006834146 | 0.240438093 |
| ENSMUSG00000097352 | C920009B18Rik | 7.21E-20    | 10.16799986 |
| ENSMUSG00000097418 | Mir155hg      | 6.60E-09    | 13.35425038 |
| ENSMUSG00000097453 | Gm26894       | 0.001238872 | 0.201477614 |
| ENSMUSG00000097462 | 9530026P05Rik | 1.37E-13    | 0.162563161 |
| ENSMUSG00000097471 | 5830432E09Rik | 1.82E-10    | 5.936973764 |
| ENSMUSG00000097504 | 4930516B21Rik | 9.20E-09    | 0.132944482 |
| ENSMUSG00000097610 | A930012L18Rik | 0.00721307  | 0.185389918 |
| ENSMUSG00000097636 | Mirt1         | 1.34E-15    | 9.8701423   |
| ENSMUSG00000097726 | 9530036O11Rik | 9.71E-07    | 0.161149957 |
| ENSMUSG00000097740 | E030044B06Rik | 0.000202779 | 0.029282125 |
| ENSMUSG00000097742 | Gm26535       | 0.002767146 | 22.67046801 |
| ENSMUSG00000097756 | A730056A06Rik | 0.002719011 | 0.021726338 |
| ENSMUSG00000097779 | 4833407H14Rik | 8.08E-21    | 10.30260379 |
| ENSMUSG00000097789 | Gm2115        | 0.000176756 | 0.187462041 |
| ENSMUSG00000097804 | Gm16685       | 4.07E-07    | 6.862854025 |
| ENSMUSG00000097815 | Gm26809       | 4.00E-23    | 8.004658169 |
| ENSMUSG00000097848 | Gm807         | 6.53E-05    | 105.2897167 |
| ENSMUSG00000097855 | A930007I19Rik | 5.98E-33    | 16.49601792 |
| ENSMUSG00000097857 | Gm26603       | 0.008139119 | 26.8916091  |
| ENSMUSG00000097877 | Gm26703       | 1.87E-06    | 9.294906527 |
| ENSMUSG00000098008 | A930001A20Rik | 0.000194542 | 0.029722809 |
| ENSMUSG00000098320 | Vis1          | 5.22E-06    | 69.79895145 |
| ENSMUSG00000098434 | 2010110E17Rik | 6.51E-05    | 88.59237521 |
| ENSMUSG00000098470 | C1rb          | 3.69E-06    | 44.96950974 |
| ENSMUSG00000098489 | Mir7678       | 0.001954058 | 54.86050179 |
| ENSMUSG00000098708 | Gm27252       | 5.14E-07    | 8.035063475 |
| ENSMUSG00000098975 | Gm27177       | 0.004020222 | 10.14969453 |
| ENSMUSG00000099338 | 2810030D12Rik | 1.05E-05    | 0.139203281 |
| ENSMUSG00000099398 | Ms4a14        | 0.000108732 | 7.647552335 |
| ENSMUSG00000099875 | Rbm3-ps       | 8.15E-07    | 4.175088346 |
| ENSMUSG00000099930 | Gm2396        | 0.000202779 | 73.37749391 |
| ENSMUSG00000099974 | Bcl2a1d       | 5.50E-46    | 9.011009195 |
| ENSMUSG00000100916 | Lhb           | 8.54E-07    | 0.192491223 |
| ENSMUSG00000101132 | Gm8000        | 0.000941498 | 7.976839234 |
| ENSMUSG00000101389 | Ms4a4a        | 1.26E-40    | 14.53837182 |
| ENSMUSG00000101517 | 4732465J04Rik | 0.000500498 | 7.055369074 |
| ENSMUSG00000101872 | Gm29237       | 1.20E-12    | 0.201333482 |
| ENSMUSG00000102037 | Bcl2a1a       | 7.09E-51    | 8.633521819 |
| ENSMUSG00000102051 | I830127L07Rik | 3.18E-11    | 6.070089765 |
| ENSMUSG00000102155 | Gm37468       | 0.002008584 | 6.605083235 |
| ENSMUSG00000102269 | Gm7357        | 0.002619754 | 0.075018065 |
| ENSMUSG00000102329 | Gm10851       | 0.001940707 | 4.231480529 |
| ENSMUSG00000102376 | Gm37975       | 0.003887586 | 8.265303041 |
| ENSMUSG00000102471 | Gm5100        | 0.009956172 | 28.24304715 |
| ENSMUSG00000102697 | Pcdhac2       | 3.00E-20    | 0.126641353 |
| ENSMUSG00000102715 | Gm6209        | 2.72E-07    | 49.10330275 |
| ENSMUSG00000102895 | 5830415G21Rik | 6.12E-05    | 65.70619656 |
| ENSMUSG00000102975 | Gm37347       | 1.54E-05    | 22.38589511 |
| ENSMUSG00000103174 | Gm37168       | 0.000343961 | 10.11788219 |
| ENSMUSG00000103219 | Gm37787       | 0.009838802 | 29.08686824 |
| ENSMUSG00000103308 | Gm37800       | 4.40E-08    | 197.6365217 |

## List 1 continued

|                    |               |             |             |
|--------------------|---------------|-------------|-------------|
| ENSMUSG00000103439 | Gm7019        | 3.75E-05    | 6.612248983 |
| ENSMUSG00000103588 | Gm18445       | 7.06E-05    | 90.8913337  |
| ENSMUSG00000103847 | Gm20056       | 6.35E-16    | 39.34230897 |
| ENSMUSG00000103907 | Gm37498       | 8.43E-05    | 81.54086115 |
| ENSMUSG00000104068 | Gm37199       | 4.22E-07    | 76.32251892 |
| ENSMUSG00000104082 | Gm7115        | 3.59E-07    | 24.87588501 |
| ENSMUSG00000104348 | Gm37691       | 6.54E-35    | 22.34310772 |
| ENSMUSG00000104467 | Gm37660       | 0.000823019 | 7.848466973 |
| ENSMUSG00000104728 | Gm42462       | 1.51E-29    | 76.54867461 |
| ENSMUSG00000104818 | Gm43661       | 2.17E-05    | 37.50054616 |
| ENSMUSG00000104913 | Gm6560        | 5.13E-15    | 5.711852292 |
| ENSMUSG00000105006 | Gm9484        | 0.006204832 | 5.271758813 |
| ENSMUSG00000105112 | Gm42778       | 0.000390374 | 0.217649401 |
| ENSMUSG00000105357 | Gm42647       | 1.71E-06    | 81.14386275 |
| ENSMUSG00000105403 | Gm43618       | 0.004560294 | 0.093925704 |
| ENSMUSG00000105504 | Gbp5          | 4.62E-06    | 18.73126225 |
| ENSMUSG00000105746 | Gm43595       | 6.66E-05    | 0.133105722 |
| ENSMUSG00000105769 | Gm43351       | 0.009192096 | 37.44848192 |
| ENSMUSG00000105843 | Gm19439       | 1.76E-15    | 0.150298144 |
| ENSMUSG00000105987 | Al506816      | 8.77E-23    | 4.760221375 |
| ENSMUSG00000106261 | Gm34086       | 0.00766714  | 42.24301127 |
| ENSMUSG00000106416 | Gm5857        | 0.002316463 | 0.204083813 |
| ENSMUSG00000106478 | Gm36551       | 7.11E-07    | 11.61700907 |
| ENSMUSG00000106574 | Gm2451        | 0.002950186 | 6.62881783  |
| ENSMUSG00000106609 | Gm43181       | 2.04E-56    | 101.8270521 |
| ENSMUSG00000106755 | Tpi-rs11      | 2.77E-05    | 4.785286037 |
| ENSMUSG00000106783 | Chaer1        | 0.000114818 | 4.574608366 |
| ENSMUSG00000106874 | Gm20186       | 1.69E-06    | 4.674923049 |
| ENSMUSG00000107111 | Gm40304       | 0.004145518 | 44.06129911 |
| ENSMUSG00000107191 | Gm43579       | 0.004392962 | 0.023834437 |
| ENSMUSG00000107317 | Gm19719       | 0.00902013  | 4.730552284 |
| ENSMUSG00000107355 | Al839979      | 4.86E-11    | 7.302115628 |
| ENSMUSG00000107451 | Gm44421       | 0.000172806 | 0.171661212 |
| ENSMUSG00000107479 | 2610300M13Rik | 0.001454217 | 24.76517545 |
| ENSMUSG00000107480 | Gm44165       | 0.006357958 | 11.62317443 |
| ENSMUSG00000107655 | Gm44220       | 6.10E-18    | 0.086944473 |
| ENSMUSG00000107768 | Gm44275       | 0.000116018 | 17.56496825 |
| ENSMUSG00000107770 | Gm44126       | 0.000189569 | 6.213595919 |
| ENSMUSG00000107811 | Gm44000       | 0.00459056  | 0.235104017 |
| ENSMUSG00000108010 | Gm38708       | 0.000232663 | 0.190006271 |
| ENSMUSG00000108024 | Gm43912       | 0.004513175 | 5.886405232 |
| ENSMUSG00000108059 | Gm44369       | 0.004189305 | 10.81501677 |
| ENSMUSG00000108161 | Gm32914       | 0.000515901 | 22.61028395 |
| ENSMUSG00000108210 | Gm35808       | 7.62E-06    | 95.08709297 |
| ENSMUSG00000108255 | Gm16499       | 0.001017089 | 0.024471037 |
| ENSMUSG00000108291 | Gm44292       | 7.90E-05    | 63.9359637  |
| ENSMUSG00000108358 | Gm44509       | 3.81E-07    | 0.232591156 |
| ENSMUSG00000108436 | Gm44851       | 3.63E-06    | 20.32541619 |
| ENSMUSG00000108481 | Gm33248       | 2.85E-06    | 0.219701401 |
| ENSMUSG00000108580 | Gm39094       | 0.000337969 | 0.094560303 |
| ENSMUSG00000108695 | Gm2511        | 4.20E-08    | 248.9724355 |
| ENSMUSG00000108859 | Gm44776       | 0.009945294 | 39.29759266 |
| ENSMUSG00000108950 | 9130015G15Rik | 1.76E-08    | 0.217414832 |
| ENSMUSG00000109005 | Gm45221       | 5.66E-07    | 11.91331913 |
| ENSMUSG00000109036 | 2210406H18Rik | 1.48E-09    | 7.068978247 |
| ENSMUSG00000109251 | E230032D23Rik | 5.70E-13    | 19.1549092  |
| ENSMUSG00000109321 | A330076H08Rik | 0.003634256 | 0.199667722 |
| ENSMUSG00000109587 | Gm31105       | 7.04E-06    | 0.184798608 |
| ENSMUSG00000109669 | Gm45472       | 0.000466354 | 10.77543936 |
| ENSMUSG00000109674 | Gm45470       | 0.000221765 | 0.104704547 |
| ENSMUSG00000109864 | Eid3          | 0.003887586 | 6.827533911 |
| ENSMUSG00000110185 | Igip          | 3.50E-07    | 0.234647039 |
| ENSMUSG00000110344 | Gm45716       | 7.75E-06    | 4.037968492 |
| ENSMUSG00000110380 | Gm45332       | 9.58E-05    | 0.222167917 |

## List 1 continued

|                    |               |             |             |
|--------------------|---------------|-------------|-------------|
| ENSMUSG00000110397 | Gm45540       | 2.87E-06    | 0.112018733 |
| ENSMUSG00000110427 | 4933406B17Rik | 0.000277297 | 0.153530717 |
| ENSMUSG00000110498 | A630001O12Rik | 4.29E-06    | 7.867610278 |
| ENSMUSG00000110588 | Gm45774       | 0.000882027 | 59.86335351 |
| ENSMUSG00000110697 | Gm31718       | 2.46E-36    | 40.91622053 |
| ENSMUSG00000110702 | Gm45767       | 0.001550687 | 0.246849975 |
| ENSMUSG00000110891 | Gm40639       | 0.002065419 | 0.021029608 |
| ENSMUSG00000111116 | Gm48065       | 7.25E-06    | 22.15340529 |
| ENSMUSG00000111394 | AC160637.1    | 7.14E-13    | 4.792393934 |
| ENSMUSG00000111662 | Gm7435        | 0.000514285 | 0.124934816 |
| ENSMUSG00000111713 | Gm20234       | 0.001381142 | 4.646487724 |
| ENSMUSG00000111720 | Gm39459       | 0.000167263 | 80.84905369 |
| ENSMUSG00000111752 | Gm38575       | 8.67E-05    | 88.97720506 |
| ENSMUSG00000112023 | Lilr4b        | 6.99E-60    | 42.84896477 |
| ENSMUSG00000112129 | Pbld1         | 0.000732331 | 0.093369879 |
| ENSMUSG00000112146 | Gm46210       | 2.68E-05    | 14.21939805 |
| ENSMUSG00000112148 | Lilrb4a       | 3.47E-33    | 21.817734   |
| ENSMUSG00000112226 | Gm48786       | 0.000375892 | 17.16503474 |
| ENSMUSG00000112265 | Gm34983       | 0.002271315 | 8.151104604 |
| ENSMUSG00000112500 | 4933411E08Rik | 0.009869343 | 0.059921626 |
| ENSMUSG00000112618 | Gm48835       | 0.003881582 | 0.114174237 |
| ENSMUSG00000112758 | Gm36172       | 0.000828723 | 16.30117915 |
| ENSMUSG00000112762 | 4930459C07Rik | 1.54E-05    | 81.66365131 |
| ENSMUSG00000112766 | Gm40645       | 0.009815075 | 18.0141194  |
| ENSMUSG00000112792 | Gm38407       | 4.31E-11    | 9.053008209 |
| ENSMUSG00000112843 | Gm46224       | 7.08E-14    | 30.45384327 |
| ENSMUSG00000112980 | D430020J02Rik | 2.43E-11    | 6.224902811 |
| ENSMUSG00000113136 | Gm19951       | 5.56E-20    | 15.88595291 |
| ENSMUSG00000113309 | Gm48408       | 0.002345329 | 50.30839063 |
| ENSMUSG00000113338 | A530046M15Rik | 0.000346258 | 76.56484411 |
| ENSMUSG00000113346 | Eprn          | 8.12E-06    | 5.000528858 |
| ENSMUSG00000113553 | Gm40932       | 0.000111277 | 23.85792046 |
| ENSMUSG00000113701 | B230303A05Rik | 1.12E-16    | 255.7173117 |
| ENSMUSG00000113960 | 4933412O06Rik | 2.43E-08    | 213.7681453 |
| ENSMUSG00000114033 | Gm47705       | 0.002733306 | 5.264415568 |
| ENSMUSG00000114055 | Gm32089       | 2.79E-09    | 297.2277071 |
| ENSMUSG00000114068 | Gm48783       | 0.000300281 | 28.41973429 |
| ENSMUSG00000114161 | Gm48662       | 2.94E-09    | 0.105566749 |
| ENSMUSG00000114245 | Gm38655       | 2.26E-09    | 0.128446341 |
| ENSMUSG00000114278 | Gm49027       | 0.000404467 | 0.142575444 |
| ENSMUSG00000114355 | Gm40916       | 0.001560183 | 40.56136772 |
| ENSMUSG00000114414 | A930014D07Rik | 0.000454236 | 64.38243983 |
| ENSMUSG00000114608 | Gm36161       | 8.21E-20    | 8.447685353 |
| ENSMUSG00000114662 | Gm31683       | 0.003094656 | 6.666721892 |
| ENSMUSG00000114755 | Galr3         | 0.000988157 | 11.29764155 |
| ENSMUSG00000114784 | Gm47754       | 0.009069915 | 6.395323872 |
| ENSMUSG00000114980 | 4933432I03Rik | 8.98E-07    | 120.7961408 |
| ENSMUSG00000114988 | Gm49226       | 0.002474396 | 50.61914968 |
| ENSMUSG00000115026 | Gm49041       | 0.00062898  | 4.660909612 |
| ENSMUSG00000115205 | Gm16374       | 0.007343971 | 8.751093443 |
| ENSMUSG00000115355 | 4930445E18Rik | 0.001007284 | 61.54606017 |
| ENSMUSG00000115391 | Gm49123       | 0.00221147  | 50.55502406 |
| ENSMUSG00000115426 | Gm19510       | 4.46E-10    | 323.1002369 |
| ENSMUSG00000115439 | Gm36107       | 0.001395752 | 56.02761034 |
| ENSMUSG00000115480 | Gm49249       | 0.003706695 | 12.51613556 |
| ENSMUSG00000115518 | Gm10791       | 0.000578304 | 4.963699787 |
| ENSMUSG00000115536 | Gm32857       | 0.000518619 | 0.034663798 |
| ENSMUSG00000115593 | Gm4824        | 0.009716917 | 4.670646765 |
| ENSMUSG00000115801 | AC160336.1    | 2.15E-05    | 0.070795983 |
| ENSMUSG00000115816 | Gm34589       | 0.006709293 | 5.944562303 |
| ENSMUSG00000115855 | Gm34643       | 1.68E-10    | 374.0622207 |
| ENSMUSG00000115869 | Gm31814       | 2.08E-14    | 19.13057757 |
| ENSMUSG00000115902 | AC113595.1    | 3.12E-15    | 4.940427384 |
| ENSMUSG00000115919 | Gm31583       | 0.00239599  | 32.66660997 |

**List 1 continued**

|                    |            |             |             |
|--------------------|------------|-------------|-------------|
| ENSMUSG00000115946 | Mirt2      | 6.79E-07    | 24.81581919 |
| ENSMUSG00000116380 | Gm39556    | 2.38E-06    | 4.054982703 |
| ENSMUSG00000116657 | AC127341.3 | 7.65E-07    | 13.58494023 |
| ENSMUSG00000116720 | AC154546.2 | 0.004529363 | 0.247150304 |
| ENSMUSG00000116935 | AC117241.2 | 0.000121043 | 82.47455111 |
| ENSMUSG00000117232 | CT030665.2 | 0.000115386 | 11.77089159 |
| ENSMUSG00000117309 | CT010583.2 | 0.000276478 | 12.33494844 |
| ENSMUSG00000117315 | AC154218.2 | 0.000610067 | 28.30403511 |
| ENSMUSG00000117318 | AC241601.2 | 0.000225845 | 16.10299974 |

**List 2. Differentially Expressed Genes between Diabetic+DMOG, A. f vs Diabetic, A. f**

| gene id            | gene name | padj (Diabetic+DMOG vs Diabetic) | Fold-Change (Diabetic+DMOG vs Diabetic) |
|--------------------|-----------|----------------------------------|-----------------------------------------|
| ENSMUSG00000000031 | H19       | 1.32E-05                         | 11.01150343                             |
| ENSMUSG00000000204 | Slnf4     | 0.004742932                      | 0.193554861                             |
| ENSMUSG00000000982 | Ccl3      | 6.83E-07                         | 0.109129139                             |
| ENSMUSG00000000983 | Wfdc18    | 0.006818173                      | 0.161590382                             |
| ENSMUSG00000001131 | Timp1     | 6.55E-18                         | 0.208331927                             |
| ENSMUSG00000001156 | Mxd1      | 1.51E-26                         | 0.219501448                             |
| ENSMUSG00000001865 | Cpa3      | 0.000374254                      | 4.085676331                             |
| ENSMUSG00000002588 | Pon1      | 8.59E-21                         | 4.88196508                              |
| ENSMUSG00000003477 | Inmt      | 2.73E-21                         | 6.761238303                             |
| ENSMUSG00000004035 | Gstm7     | 1.63E-07                         | 4.633950739                             |
| ENSMUSG00000004371 | Il11      | 2.89E-05                         | 0.186995547                             |
| ENSMUSG00000004814 | Ccl24     | 7.33E-06                         | 0.212934934                             |
| ENSMUSG00000005054 | Cstb      | 6.44E-14                         | 0.237706494                             |
| ENSMUSG00000005057 | Sh2b2     | 1.85E-12                         | 0.198686397                             |
| ENSMUSG00000005320 | Fgfr4     | 1.92E-07                         | 4.065607136                             |
| ENSMUSG00000005547 | Cyp2a5    | 2.10E-09                         | 4.851691725                             |
| ENSMUSG00000005800 | Mmp8      | 0.00477947                       | 0.187180721                             |
| ENSMUSG00000006235 | Epor      | 1.85E-06                         | 4.167555338                             |
| ENSMUSG00000006269 | Atp6v1b1  | 1.30E-09                         | 23.47181641                             |
| ENSMUSG00000006403 | Adamts4   | 3.71E-12                         | 0.160703746                             |
| ENSMUSG00000006567 | Atp7b     | 1.45E-15                         | 4.925891867                             |
| ENSMUSG00000006724 | Cyp27b1   | 0.001422969                      | 0.086972505                             |
| ENSMUSG00000007279 | Scube2    | 3.63E-27                         | 5.608852036                             |
| ENSMUSG00000007877 | Tcap      | 3.35E-05                         | 7.463814307                             |
| ENSMUSG00000007946 | Phox2a    | 1.67E-05                         | 0.146686051                             |
| ENSMUSG00000010651 | Acaa1b    | 0.000169863                      | 4.073623774                             |
| ENSMUSG00000013483 | Card14    | 0.004667878                      | 4.812785282                             |
| ENSMUSG00000014542 | Clec4f    | 0.006748923                      | 7.370537018                             |
| ENSMUSG00000014782 | Plekhg4   | 0.000202482                      | 0.148470804                             |
| ENSMUSG00000015354 | Pcolce2   | 2.77E-16                         | 4.948629167                             |
| ENSMUSG00000015970 | Chdh      | 0.000230577                      | 4.865780861                             |
| ENSMUSG00000016349 | Eef1a2    | 0.001517209                      | 4.791931302                             |
| ENSMUSG00000016496 | Cd274     | 4.02E-14                         | 0.148503956                             |
| ENSMUSG00000016529 | Il10      | 9.73E-06                         | 0.105488266                             |
| ENSMUSG00000017002 | Slpi      | 7.56E-05                         | 0.161741835                             |
| ENSMUSG00000018566 | Slc2a4    | 3.92E-06                         | 4.339252065                             |
| ENSMUSG00000018893 | Mb        | 6.93E-08                         | 15.51386395                             |
| ENSMUSG00000018930 | Ccl4      | 4.73E-26                         | 0.059414395                             |
| ENSMUSG00000019787 | Trdn      | 0.007884042                      | 6.093114748                             |
| ENSMUSG00000019850 | Tnfaip3   | 2.49E-17                         | 0.213885176                             |
| ENSMUSG00000019880 | Rspo3     | 8.55E-10                         | 0.165476396                             |
| ENSMUSG00000019905 | Gprc6a    | 1.08E-08                         | 4.718291091                             |
| ENSMUSG00000020022 | Ndufa12   | 1.91E-28                         | 0.207289708                             |
| ENSMUSG00000020096 | Tbata     | 0.000383542                      | 6.898569231                             |
| ENSMUSG00000020182 | Ddc       | 1.03E-07                         | 5.492045089                             |
| ENSMUSG00000020218 | Wif1      | 2.38E-05                         | 5.619550546                             |
| ENSMUSG00000020227 | Irak3     | 7.17E-10                         | 0.243590802                             |
| ENSMUSG00000020251 | Gltr8d2   | 1.02E-08                         | 5.375513883                             |
| ENSMUSG00000020334 | Slc22a4   | 6.62E-07                         | 0.220625056                             |
| ENSMUSG00000020407 | Upp1      | 8.67E-43                         | 0.178490508                             |
| ENSMUSG00000020431 | Adcy1     | 4.77E-05                         | 11.4013578                              |
| ENSMUSG00000020524 | Gria1     | 2.30E-08                         | 4.836321568                             |
| ENSMUSG00000020591 | Ntsr2     | 0.000450995                      | 6.235955469                             |
| ENSMUSG00000020620 | Abca8b    | 1.09E-10                         | 4.029208739                             |
| ENSMUSG00000020641 | Rsad2     | 0.002926344                      | 0.097917937                             |
| ENSMUSG00000020826 | Nos2      | 5.29E-26                         | 0.06849956                              |
| ENSMUSG00000020990 | Cdk11     | 4.66E-06                         | 4.242820768                             |
| ENSMUSG00000021055 | Esr2      | 2.73E-05                         | 4.019367421                             |
| ENSMUSG00000021198 | Unc79     | 3.45E-06                         | 6.293882747                             |
| ENSMUSG00000021278 | Amn       | 0.008587908                      | 0.12536013                              |
| ENSMUSG00000021281 | Tnfaip2   | 1.83E-25                         | 0.231980835                             |
| ENSMUSG00000021322 | Aoah      | 6.36E-37                         | 0.230843126                             |
| ENSMUSG00000021591 | Glrx      | 2.39E-12                         | 0.242473012                             |
| ENSMUSG00000021750 | Fam107a   | 8.95E-11                         | 4.701504844                             |
| ENSMUSG00000022026 | Olfm4     | 0.00013823                       | 0.167040911                             |
| ENSMUSG00000022126 | Acod1     | 8.36E-41                         | 0.103658522                             |
| ENSMUSG00000022206 | Npr3      | 1.38E-09                         | 4.12674082                              |
| ENSMUSG00000022262 | Dnah5     | 4.97E-09                         | 4.671790504                             |
| ENSMUSG00000022304 | Dpys      | 0.001077072                      | 0.188888367                             |
| ENSMUSG00000022367 | Has2      | 0.002703001                      | 0.184819854                             |
| ENSMUSG00000022534 | Mefv      | 4.08E-22                         | 0.215845775                             |



## List 2 continued

|                    |            |             |              |
|--------------------|------------|-------------|--------------|
| ENSMUSG00000022586 | Ly6i       | 5.16E-14    | 0.188039247  |
| ENSMUSG00000022758 | P2rx6      | 7.17E-13    | 6.076360748  |
| ENSMUSG00000022759 | Lrrc74b    | 6.40E-10    | 4.584088678  |
| ENSMUSG00000023011 | Faim2      | 1.17E-14    | 6.599861403  |
| ENSMUSG00000023349 | Clec4n     | 1.27E-14    | 0.217633918  |
| ENSMUSG00000023913 | Pla2g7     | 2.32E-26    | 0.225761091  |
| ENSMUSG00000024008 | Cpne5      | 0.007401267 | 4.202342644  |
| ENSMUSG00000024041 | Cryaa      | 0.007225085 | 4.892408062  |
| ENSMUSG00000024401 | Tnf        | 3.58E-27    | 0.081748552  |
| ENSMUSG00000024679 | Ms4a6d     | 1.01E-19    | 0.217530949  |
| ENSMUSG00000024737 | Slc15a3    | 3.67E-32    | 0.227624141  |
| ENSMUSG00000024774 | Ankrd22    | 0.00398197  | 0.24565208   |
| ENSMUSG00000024798 | Htr7       | 3.94E-11    | 0.146762809  |
| ENSMUSG00000024953 | Prdx5      | 4.91E-51    | 0.192938074  |
| ENSMUSG00000025044 | Msr1       | 2.57E-20    | 0.215709157  |
| ENSMUSG00000025165 | Sectm1a    | 0.009218806 | 0.244787935  |
| ENSMUSG00000025318 | Jph3       | 0.000121111 | 0.198799364  |
| ENSMUSG00000025383 | Il23a      | 4.65E-11    | 0.144711817  |
| ENSMUSG00000025479 | Cyp2e1     | 8.11E-05    | 6.538174913  |
| ENSMUSG00000025746 | Il6        | 1.08E-05    | 0.082454048  |
| ENSMUSG00000025789 | St8sia2    | 2.06E-06    | 4.439622575  |
| ENSMUSG00000025854 | Fam20c     | 4.43E-12    | 0.22996691   |
| ENSMUSG00000025877 | Hk3        | 2.82E-24    | 0.203895381  |
| ENSMUSG00000025936 | Gm4956     | 5.44E-08    | 4.664401332  |
| ENSMUSG00000026018 | Ica11      | 0.003003138 | 6.157413918  |
| ENSMUSG00000026073 | Il1r2      | 2.96E-11    | 0.190130736  |
| ENSMUSG00000026177 | Slc11a1    | 2.63E-13    | 0.232333606  |
| ENSMUSG00000026304 | Rab17      | 0.000132648 | 4.727534131  |
| ENSMUSG00000026358 | Rgs1       | 2.79E-08    | 0.203612789  |
| ENSMUSG00000026398 | Nr3a2      | 9.72E-07    | 0.228636534  |
| ENSMUSG00000026475 | Rgs16      | 7.30E-18    | 0.180110538  |
| ENSMUSG00000026536 | Ifi211     | 0.000545332 | 0.15157194   |
| ENSMUSG00000026580 | Selp       | 1.18E-20    | 0.214382646  |
| ENSMUSG00000026582 | Sele       | 1.13E-13    | 0.112159079  |
| ENSMUSG00000026676 | Ccdc3      | 0.009630676 | 11.13416121  |
| ENSMUSG00000026691 | Fmo3       | 3.47E-08    | 5.262275123  |
| ENSMUSG00000026768 | Itga8      | 3.58E-27    | 5.878007999  |
| ENSMUSG00000026981 | Il1rn      | 2.87E-15    | 0.174795811  |
| ENSMUSG00000026984 | Il1f6      | 0.000363903 | 0.013949402  |
| ENSMUSG00000027335 | Adra1d     | 0.001069303 | 4.091072596  |
| ENSMUSG00000027398 | Il1b       | 1.67E-24    | 0.117804928  |
| ENSMUSG00000027399 | Il1a       | 1.39E-24    | 0.090170443  |
| ENSMUSG00000027442 | Cst8       | 5.20E-05    | 11.04608557  |
| ENSMUSG00000027513 | Pck1       | 0.008895282 | 11.34351509  |
| ENSMUSG00000027514 | Zbp1       | 0.007905012 | 0.205911488  |
| ENSMUSG00000027559 | Car3       | 3.24E-05    | 8.707795397  |
| ENSMUSG00000027560 | Dok5       | 4.80E-05    | 0.08832037   |
| ENSMUSG00000027611 | Procr      | 2.90E-20    | 0.205637375  |
| ENSMUSG00000027737 | Slc7a11    | 1.53E-09    | 0.211425806  |
| ENSMUSG00000027776 | Il12a      | 1.19E-13    | 0.152218752  |
| ENSMUSG00000027832 | Ptx3       | 6.75E-06    | 0.082483511  |
| ENSMUSG00000028270 | Gbp2       | 0.003526202 | 0.152023138  |
| ENSMUSG00000028356 | Ambp       | 0.000251341 | 0.115395623  |
| ENSMUSG00000028364 | Tnc        | 1.39E-11    | 0.234171885  |
| ENSMUSG00000028488 | Sh3gl2     | 1.58E-05    | 6.001900743  |
| ENSMUSG00000028599 | Tnfrsf1b   | 1.65E-24    | 0.236599915  |
| ENSMUSG00000028602 | Tnfrsf8    | 1.52E-10    | 0.202344864  |
| ENSMUSG00000028730 | Cfap57     | 8.48E-14    | 4.846697159  |
| ENSMUSG00000028940 | Hes2       | 0.000601265 | 9.811923482  |
| ENSMUSG00000028996 | Rbp7       | 0.00172218  | 6.458536177  |
| ENSMUSG00000029082 | Bst1       | 2.24E-35    | 0.227576107  |
| ENSMUSG00000029273 | Sult1d1    | 1.22E-06    | 6.149668205  |
| ENSMUSG00000029371 | Cxcl5      | 2.00E-16    | 0.135063534  |
| ENSMUSG00000029377 | Ereg       | 2.63E-06    | 0.158908027  |
| ENSMUSG00000029379 | Cxcl3      | 9.13E-09    | 0.209041893  |
| ENSMUSG00000029380 | Cxcl1      | 2.36E-15    | 0.095824333  |
| ENSMUSG00000029417 | Cxcl9      | 0.00626627  | 0.1111104922 |
| ENSMUSG00000029778 | Adecyap1r1 | 9.25E-05    | 4.237212232  |
| ENSMUSG00000029819 | Npy        | 0.006477309 | 0.0918083    |
| ENSMUSG00000029843 | Slc13a4    | 7.07E-05    | 4.68235823   |
| ENSMUSG00000029915 | Clec5a     | 5.46E-27    | 0.165471778  |
| ENSMUSG00000030048 | Gkn3       | 0.000816303 | 10.82836953  |

## List 2 continued

|                    |               |             |             |
|--------------------|---------------|-------------|-------------|
| ENSMUSG00000030069 | Prok2         | 1.41E-08    | 0.094407961 |
| ENSMUSG00000030087 | Klf15         | 1.47E-36    | 5.231376662 |
| ENSMUSG00000030108 | Slc6a13       | 1.06E-06    | 0.243890895 |
| ENSMUSG00000030125 | Lrrc23        | 1.28E-08    | 4.431117824 |
| ENSMUSG00000030142 | Clec4e        | 1.56E-24    | 0.130964363 |
| ENSMUSG00000030144 | Clec4d        | 6.85E-13    | 0.155089729 |
| ENSMUSG00000030268 | Bcat1         | 0.009265841 | 0.246337743 |
| ENSMUSG00000030278 | Cidec         | 8.82E-07    | 5.113456719 |
| ENSMUSG00000030302 | Atp2b2        | 7.42E-08    | 6.319952654 |
| ENSMUSG00000030399 | Ckm           | 0.002862428 | 34.21278097 |
| ENSMUSG00000030402 | Ppm1n         | 4.66E-06    | 0.099717723 |
| ENSMUSG00000030470 | Csrp3         | 1.11E-11    | 13.61880722 |
| ENSMUSG00000030495 | Slc7a10       | 2.74E-08    | 4.9324912   |
| ENSMUSG00000030546 | Plin1         | 0.005754904 | 9.015547941 |
| ENSMUSG00000030562 | Nox4          | 5.35E-10    | 4.111975125 |
| ENSMUSG00000030737 | Slco2b1       | 3.33E-17    | 4.610214771 |
| ENSMUSG00000031104 | Rab33a        | 0.007330699 | 0.193299119 |
| ENSMUSG00000031163 | Glod5         | 0.002749641 | 0.084854603 |
| ENSMUSG00000031257 | Nox1          | 0.000117928 | 7.721584712 |
| ENSMUSG00000031294 | D630029K05Rik | 0.001652566 | 4.446368812 |
| ENSMUSG00000031444 | F10           | 7.96E-27    | 0.140170875 |
| ENSMUSG00000031461 | Myom2         | 7.33E-08    | 11.64152042 |
| ENSMUSG00000031554 | Adam5         | 0.003774595 | 11.78908173 |
| ENSMUSG00000031725 | Ces1f         | 4.95E-08    | 18.17853204 |
| ENSMUSG00000031870 | Pgr           | 2.60E-05    | 4.051384332 |
| ENSMUSG00000031881 | Cdh16         | 1.07E-12    | 4.199310776 |
| ENSMUSG00000031966 | Glb1l3        | 0.002653691 | 5.424934709 |
| ENSMUSG00000032315 | Cyp1a1        | 3.29E-28    | 13.5133289  |
| ENSMUSG00000032487 | Ptgs2         | 8.06E-10    | 0.22992373  |
| ENSMUSG00000032532 | Cck           | 0.004632294 | 0.049469097 |
| ENSMUSG00000032661 | Oas3          | 0.004412565 | 0.205495833 |
| ENSMUSG00000032691 | Nlrp3         | 4.61E-16    | 0.203978559 |
| ENSMUSG00000032925 | Itgbl1        | 0.000107974 | 5.022455484 |
| ENSMUSG00000032942 | Ucp3          | 2.90E-06    | 7.291944174 |
| ENSMUSG00000033207 | Mamdc2        | 1.06E-18    | 5.851643921 |
| ENSMUSG00000033213 | AA467197      | 4.92E-34    | 0.133402737 |
| ENSMUSG00000033508 | Asprv1        | 0.001830273 | 0.129917584 |
| ENSMUSG00000033644 | Piwil2        | 2.03E-07    | 0.219115488 |
| ENSMUSG00000033967 | Rnf225        | 5.58E-07    | 4.338662821 |
| ENSMUSG00000034226 | Rhov          | 2.76E-12    | 0.179372626 |
| ENSMUSG00000034391 | Fbxo15        | 0.00191754  | 0.184446458 |
| ENSMUSG00000034416 | Pkd1l2        | 0.0070866   | 0.222402271 |
| ENSMUSG00000034855 | Cxcl10        | 2.95E-05    | 0.050853551 |
| ENSMUSG00000035186 | Ubd           | 1.27E-05    | 0.053814305 |
| ENSMUSG00000035208 | Slfn8         | 0.009290678 | 0.23864066  |
| ENSMUSG00000035296 | Sgeg          | 2.46E-05    | 7.444996392 |
| ENSMUSG00000035352 | Ccl12         | 2.46E-08    | 0.221482926 |
| ENSMUSG00000035373 | Ccl7          | 1.19E-14    | 0.1001819   |
| ENSMUSG00000035385 | Ccl2          | 5.44E-35    | 0.109975304 |
| ENSMUSG00000035407 | Kank4         | 1.27E-10    | 4.132778603 |
| ENSMUSG00000035448 | Ccr3          | 0.001203483 | 4.194931294 |
| ENSMUSG00000035459 | Stab2         | 0.000172288 | 4.099943994 |
| ENSMUSG00000035486 | Plk5          | 0.001513051 | 6.805192283 |
| ENSMUSG00000035686 | Thrsp         | 3.40E-06    | 5.344900633 |
| ENSMUSG00000035692 | Isg15         | 0.002672999 | 0.119481795 |
| ENSMUSG00000035910 | Dcdc2a        | 4.77E-08    | 6.99745827  |
| ENSMUSG00000036095 | Dgkb          | 0.00366343  | 6.924009533 |
| ENSMUSG00000036931 | Nfkbid        | 1.30E-11    | 0.218189854 |
| ENSMUSG00000037477 | Tbx10         | 0.00562314  | 0.02647108  |
| ENSMUSG00000037492 | Zmat4         | 6.65E-06    | 11.59976159 |
| ENSMUSG00000037613 | Tnfrsf23      | 2.27E-10    | 0.233335761 |
| ENSMUSG00000037771 | Slc32a1       | 0.004926946 | 0.181148722 |
| ENSMUSG00000037872 | Ackr1         | 9.90E-05    | 0.195025572 |
| ENSMUSG00000037966 | Ninj1         | 9.37E-18    | 0.206922385 |
| ENSMUSG00000037973 | Ccdc129       | 7.37E-05    | 4.332825264 |
| ENSMUSG00000038037 | Socs1         | 0.001058261 | 0.154410871 |
| ENSMUSG00000038067 | Csf3          | 4.45E-06    | 0.061818728 |
| ENSMUSG00000038209 | Itln1         | 0.005346167 | 10.87637124 |
| ENSMUSG00000038259 | Gdf5          | 0.00244691  | 8.580409667 |
| ENSMUSG00000038357 | Camp          | 0.000331597 | 0.242043067 |
| ENSMUSG00000038756 | Ttll6         | 2.81E-07    | 6.358491421 |
| ENSMUSG00000038791 | Segb3a2       | 9.22E-15    | 4.705821326 |

## List 2 continued

|                    |               |             |             |
|--------------------|---------------|-------------|-------------|
| ENSMUSG00000039084 | Chad          | 2.14E-08    | 4.474972991 |
| ENSMUSG00000039196 | Orm1          | 1.43E-25    | 0.224216958 |
| ENSMUSG00000039257 | Vstm2b        | 0.00219286  | 11.9378852  |
| ENSMUSG00000039395 | Mreg          | 2.55E-13    | 0.17115876  |
| ENSMUSG00000039883 | Lrre17        | 6.59E-05    | 4.211412399 |
| ENSMUSG00000040026 | Saa3          | 3.92E-22    | 0.172660624 |
| ENSMUSG00000040752 | Myh6          | 4.75E-05    | 11.22829958 |
| ENSMUSG00000040838 | Gm11639       | 8.14E-06    | 0.048298537 |
| ENSMUSG00000040950 | Mgl2          | 8.95E-20    | 4.329061996 |
| ENSMUSG00000041324 | Inhba         | 1.17E-23    | 0.20114505  |
| ENSMUSG00000041380 | Htr2c         | 0.000683774 | 8.461613935 |
| ENSMUSG00000041423 | Paqr6         | 8.35E-07    | 4.838055437 |
| ENSMUSG00000041624 | Gucy1a2       | 6.01E-09    | 4.392926062 |
| ENSMUSG00000041644 | Slc5a12       | 0.000887734 | 5.113274032 |
| ENSMUSG00000041789 | 2700046A07Rik | 0.00113364  | 10.68282698 |
| ENSMUSG00000041827 | Oasl1         | 0.008794306 | 0.160914479 |
| ENSMUSG00000041828 | Abca8a        | 1.22E-08    | 5.502449697 |
| ENSMUSG00000042109 | Csdc2         | 6.15E-06    | 5.638014188 |
| ENSMUSG00000042254 | Cilp          | 6.00E-05    | 8.175059727 |
| ENSMUSG00000042265 | Trem1         | 1.22E-09    | 0.193619862 |
| ENSMUSG00000042349 | Ikake         | 8.49E-31    | 0.215876167 |
| ENSMUSG00000042529 | Kcnj12        | 0.000171362 | 4.155822795 |
| ENSMUSG00000042793 | Lgr6          | 8.29E-07    | 5.808785189 |
| ENSMUSG00000043333 | Rhbd12        | 0.001071886 | 0.219876023 |
| ENSMUSG00000043424 | Eif3j2        | 0.000132473 | 0.161344144 |
| ENSMUSG00000043496 | Tril          | 1.52E-18    | 4.56183954  |
| ENSMUSG00000043631 | Ecm2          | 8.78E-09    | 4.554204118 |
| ENSMUSG00000043953 | Ccr12         | 2.72E-36    | 0.18513749  |
| ENSMUSG00000044103 | Il1f9         | 3.02E-05    | 0.153107071 |
| ENSMUSG00000044156 | Hepacam2      | 0.000539943 | 4.02448736  |
| ENSMUSG00000044352 | Sowaha        | 0.000837182 | 5.199540532 |
| ENSMUSG00000044365 | Cxxc4         | 0.000275655 | 5.309090454 |
| ENSMUSG00000044701 | Il27          | 4.35E-06    | 0.131962006 |
| ENSMUSG00000044903 | Psg22         | 0.004566425 | 0.108123474 |
| ENSMUSG00000044951 | Mylk4         | 0.004549182 | 8.655175509 |
| ENSMUSG00000045027 | Prss22        | 0.000346826 | 0.205009629 |
| ENSMUSG00000045362 | Tnfrsf26      | 1.57E-13    | 0.219845486 |
| ENSMUSG00000045381 | Olfir433      | 0.00237161  | 0.116784929 |
| ENSMUSG00000045502 | Hear2         | 3.13E-22    | 0.161589607 |
| ENSMUSG00000045534 | Kcna5         | 0.000308851 | 11.54926983 |
| ENSMUSG00000045551 | Fpr1          | 2.02E-11    | 0.16264979  |
| ENSMUSG00000045875 | Adra1a        | 6.17E-17    | 4.055325929 |
| ENSMUSG00000045915 | Ccdc42        | 0.000434986 | 4.845972974 |
| ENSMUSG00000046093 | Hpcal4        | 0.000614651 | 8.465944773 |
| ENSMUSG00000046182 | Gsg11         | 1.08E-05    | 14.90927748 |
| ENSMUSG00000046196 | Ttc39d        | 0.009439233 | 37.23829252 |
| ENSMUSG00000046610 | Oacyl         | 2.59E-06    | 0.211335435 |
| ENSMUSG00000046618 | Olfml2a       | 5.61E-12    | 4.768951546 |
| ENSMUSG00000046828 | Mettl21e      | 5.15E-06    | 5.724778556 |
| ENSMUSG00000047021 | Cfap65        | 5.59E-10    | 4.564098226 |
| ENSMUSG00000047443 | Erfe          | 0.000186342 | 0.185781701 |
| ENSMUSG00000047841 | Fndc11        | 0.005587613 | 7.038431782 |
| ENSMUSG00000047945 | Marcks11      | 4.59E-38    | 0.146296664 |
| ENSMUSG00000048038 | Ccdc187       | 3.21E-15    | 4.384338451 |
| ENSMUSG00000048621 | Gm6377        | 1.16E-09    | 0.205444998 |
| ENSMUSG00000048752 | Prss50        | 0.002992253 | 0.153580059 |
| ENSMUSG00000048834 | Vstm2a        | 0.00065559  | 5.710001072 |
| ENSMUSG00000049511 | Htr1b         | 0.001262302 | 4.482375327 |
| ENSMUSG00000050089 | Akap4         | 9.28E-09    | 0.059285019 |
| ENSMUSG00000050097 | Ces2b         | 0.000427592 | 5.094247704 |
| ENSMUSG00000050359 | Sprr1a        | 0.000688194 | 0.214671204 |
| ENSMUSG00000050395 | Tnfrsf15      | 8.30E-16    | 0.180601007 |
| ENSMUSG00000050578 | Mmp13         | 3.51E-10    | 0.228894864 |
| ENSMUSG00000051439 | Cd14          | 1.65E-05    | 0.143146627 |
| ENSMUSG00000051747 | Ttn           | 1.42E-10    | 5.176206679 |
| ENSMUSG00000051748 | Wfdc21        | 0.000290852 | 0.195746578 |
| ENSMUSG00000051906 | Cd209f        | 0.000113136 | 10.05158203 |
| ENSMUSG00000052270 | Fpr2          | 1.55E-20    | 0.160780849 |
| ENSMUSG00000052974 | Cyp2f2        | 5.69E-15    | 6.554004493 |
| ENSMUSG00000053161 | Daw1          | 0.005152125 | 4.344707612 |
| ENSMUSG00000053318 | Slamf8        | 0.000981936 | 0.154935977 |
| ENSMUSG00000053338 | Tarm1         | 3.85E-22    | 0.12474645  |

## List 2 continued

|                    |               |             |             |
|--------------------|---------------|-------------|-------------|
| ENSMUSG00000053475 | Tnfaip6       | 1.85E-06    | 0.181123703 |
| ENSMUSG00000053647 | Gper1         | 0.000177658 | 4.596918178 |
| ENSMUSG00000054146 | Krt15         | 0.000715217 | 24.79606911 |
| ENSMUSG00000054203 | Ifi205        | 9.15E-05    | 0.106056353 |
| ENSMUSG00000054422 | Fabp1         | 0.000710842 | 8.697051196 |
| ENSMUSG00000054619 | Mettl7a1      | 3.39E-12    | 4.267468213 |
| ENSMUSG00000054855 | Rnd1          | 1.95E-21    | 0.173703314 |
| ENSMUSG00000054905 | Stfa3         | 0.000292118 | 0.072935242 |
| ENSMUSG00000055170 | Ifng          | 0.003114146 | 0.205154598 |
| ENSMUSG00000055368 | Slc6a2        | 4.07E-13    | 4.897330345 |
| ENSMUSG00000056054 | S100a8        | 8.75E-05    | 0.132725377 |
| ENSMUSG00000056071 | S100a9        | 0.002521649 | 0.202527474 |
| ENSMUSG00000056529 | Ptafr         | 1.33E-28    | 0.191338705 |
| ENSMUSG00000057182 | Sen3a         | 2.26E-19    | 6.740149577 |
| ENSMUSG00000057465 | Saa2          | 3.45E-06    | 0.159881304 |
| ENSMUSG00000057606 | Colq          | 1.25E-17    | 11.79056778 |
| ENSMUSG00000057933 | Gsta2         | 0.001715172 | 5.198246595 |
| ENSMUSG00000058159 | T2            | 0.005473137 | 8.250821183 |
| ENSMUSG00000058260 | Serpina9      | 0.002288302 | 4.058470665 |
| ENSMUSG00000058427 | Cxcl2         | 0.0001281   | 0.083349823 |
| ENSMUSG00000058755 | Osm           | 3.61E-11    | 0.146757167 |
| ENSMUSG00000058914 | C1qtnf3       | 0.005661761 | 11.04337    |
| ENSMUSG00000058921 | Slc10a5       | 0.00067873  | 4.585211859 |
| ENSMUSG00000059854 | Hydin         | 2.40E-09    | 4.633299772 |
| ENSMUSG00000060183 | Cxcl11        | 0.00131531  | 0.045257974 |
| ENSMUSG00000061397 | Krt79         | 9.55E-13    | 4.889820187 |
| ENSMUSG00000061462 | Obscn         | 3.47E-05    | 5.322267972 |
| ENSMUSG00000061576 | Dpp6          | 0.003895059 | 7.661661738 |
| ENSMUSG00000061718 | Ppp1r1b       | 6.17E-13    | 4.256544195 |
| ENSMUSG00000061742 | Slc22a12      | 0.003583415 | 4.675731894 |
| ENSMUSG00000061780 | Cfd           | 0.002698981 | 7.374977259 |
| ENSMUSG00000061959 | Ces1e         | 1.93E-06    | 5.052550084 |
| ENSMUSG00000062329 | Cyt11         | 4.43E-12    | 7.084536641 |
| ENSMUSG00000062345 | Serpinb2      | 6.03E-12    | 0.107729598 |
| ENSMUSG00000062480 | Acat3         | 0.000114596 | 0.229970513 |
| ENSMUSG00000062760 | Shisa1        | 1.76E-08    | 4.890261725 |
| ENSMUSG00000063130 | Calml3        | 0.001901396 | 5.037381352 |
| ENSMUSG00000063234 | Gpr84         | 2.46E-21    | 0.098857983 |
| ENSMUSG00000063626 | Unc5d         | 0.00344372  | 11.70289282 |
| ENSMUSG00000065037 | Rn7sk         | 0.000109069 | 0.101064076 |
| ENSMUSG00000066687 | Zbtb16        | 3.81E-17    | 4.129664576 |
| ENSMUSG00000068263 | Efcc1         | 1.76E-05    | 5.168420199 |
| ENSMUSG00000068373 | D430041D05Rik | 1.20E-06    | 6.924504101 |
| ENSMUSG00000068463 | B630019A10Rik | 0.00662603  | 4.941943913 |
| ENSMUSG00000068614 | Actc1         | 2.36E-08    | 6.213508853 |
| ENSMUSG00000069792 | Wfdc17        | 6.71E-14    | 0.177469251 |
| ENSMUSG00000069873 | 4930438A08Rik | 0.000132369 | 0.060401117 |
| ENSMUSG00000070427 | Il18bp        | 2.98E-07    | 0.225274285 |
| ENSMUSG00000070524 | Fer1b         | 5.21E-10    | 0.207435298 |
| ENSMUSG00000071317 | Bves          | 0.002668971 | 7.28746452  |
| ENSMUSG00000072473 | 170024G13Rik  | 1.70E-07    | 4.581904071 |
| ENSMUSG00000072620 | Slnf2         | 1.51E-26    | 0.242232475 |
| ENSMUSG00000072844 | G530011O06Rik | 0.004129984 | 0.134481634 |
| ENSMUSG00000073274 | Gm14636       | 0.004488388 | 0.248577927 |
| ENSMUSG00000073489 | Ifi204        | 0.001338531 | 0.153930897 |
| ENSMUSG00000074115 | Saa1          | 0.003050162 | 0.206878911 |
| ENSMUSG00000074505 | Fat3          | 2.44E-05    | 4.009153839 |
| ENSMUSG00000074595 | Wfdc6a        | 0.00129491  | 5.248116795 |
| ENSMUSG00000074651 | Meidas        | 0.001200887 | 5.150019602 |
| ENSMUSG00000074981 | Dcdc5         | 0.000348263 | 7.591777267 |
| ENSMUSG00000076550 | Igkv4-63      | 0.001908242 | 23.51296937 |
| ENSMUSG00000078137 | Ankrd63       | 1.30E-17    | 4.752787723 |
| ENSMUSG00000078252 | Krtap17-1     | 0.003698087 | 41.18885152 |
| ENSMUSG00000079101 | Esd-ps        | 0.006546568 | 0.229466222 |
| ENSMUSG00000079597 | Gm5483        | 0.004320481 | 0.159324331 |
| ENSMUSG00000079700 | Fpr3          | 1.03E-08    | 0.050711158 |
| ENSMUSG00000081650 | Gm16181       | 3.59E-08    | 0.135000288 |
| ENSMUSG00000081664 | Gm15544       | 0.004295616 | 0.125778817 |
| ENSMUSG00000082976 | Gm15056       | 6.30E-06    | 0.06420482  |
| ENSMUSG00000084902 | Gm281         | 6.30E-05    | 4.411921832 |
| ENSMUSG00000084941 | Gm11944       | 0.000721415 | 5.185919659 |
| ENSMUSG00000084989 | Croce2        | 7.17E-08    | 8.648852964 |

## List 2 continued

|                    |               |             |             |
|--------------------|---------------|-------------|-------------|
| ENSMUSG00000085295 | 4930430E12Rik | 4.81E-23    | 0.171021368 |
| ENSMUSG00000085407 | 1700095J03Rik | 0.00178392  | 7.982074758 |
| ENSMUSG00000085498 | Gm14023       | 6.37E-08    | 0.153589273 |
| ENSMUSG00000086755 | Gm11216       | 0.00462387  | 0.08536235  |
| ENSMUSG00000086843 | E030013119Rik | 6.72E-07    | 6.574963686 |
| ENSMUSG00000087477 | Gm13822       | 3.22E-07    | 0.150808062 |
| ENSMUSG00000089874 | 9230117E06Rik | 0.000334833 | 5.894619773 |
| ENSMUSG00000090007 | Rpl30-ps2     | 0.001627693 | 47.18812667 |
| ENSMUSG00000090230 | Gm16315       | 9.81E-05    | 0.074344961 |
| ENSMUSG00000090257 | Gm4524        | 0.003876678 | 7.563568983 |
| ENSMUSG00000091890 | A830073O21Rik | 0.00540973  | 5.576875144 |
| ENSMUSG00000092418 | Gm20406       | 0.002628028 | 0.16385993  |
| ENSMUSG00000093973 | Mrgpra2a      | 2.47E-05    | 0.117469056 |
| ENSMUSG00000094198 | Ighv1-50      | 0.003262453 | 0.12594681  |
| ENSMUSG00000094733 | Gm5416        | 0.001370557 | 0.149498758 |
| ENSMUSG00000095620 | 2010005H15Rik | 0.00010004  | 0.077265274 |
| ENSMUSG00000096719 | Mrgpra2b      | 3.55E-07    | 0.115818536 |
| ENSMUSG00000097139 | Gm26626       | 0.000225763 | 0.229560203 |
| ENSMUSG00000097418 | Mir155hg      | 9.05E-06    | 0.189199065 |
| ENSMUSG00000097453 | Gm26894       | 0.006387096 | 4.076955691 |
| ENSMUSG00000097504 | 4930516B21Rik | 8.05E-05    | 4.245778144 |
| ENSMUSG00000098008 | A930001A20Rik | 0.000901738 | 25.77830895 |
| ENSMUSG00000101693 | Gm19461       | 1.12E-05    | 4.183217896 |
| ENSMUSG00000102269 | Gm7357        | 0.000215932 | 15.32338183 |
| ENSMUSG00000102697 | Pcdhac2       | 1.09E-08    | 4.380746328 |
| ENSMUSG00000103308 | Gm37800       | 0.002001732 | 0.240363453 |
| ENSMUSG00000103588 | Gm18445       | 6.21E-05    | 0.010661965 |
| ENSMUSG00000104621 | Gm43185       | 0.004304435 | 41.7663041  |
| ENSMUSG00000104728 | Gm42462       | 1.16E-09    | 0.229445849 |
| ENSMUSG00000104818 | Gm43661       | 0.005996952 | 0.182007835 |
| ENSMUSG00000105112 | Gm42778       | 2.02E-05    | 4.909549148 |
| ENSMUSG00000105286 | Gm43140       | 0.004305391 | 37.76947582 |
| ENSMUSG00000105357 | Gm42647       | 8.39E-06    | 0.083694861 |
| ENSMUSG00000105504 | Gbp5          | 0.003314677 | 0.125942953 |
| ENSMUSG00000106609 | Gm43181       | 3.99E-17    | 0.168237453 |
| ENSMUSG00000107191 | Gm43579       | 0.009086609 | 34.60228674 |
| ENSMUSG00000107655 | Gm44220       | 7.50E-11    | 5.245017552 |
| ENSMUSG00000108010 | Gm38708       | 8.86E-06    | 5.30647441  |
| ENSMUSG00000108161 | Gm32914       | 0.003140755 | 0.129779221 |
| ENSMUSG00000108210 | Gm35808       | 0.001124329 | 0.209049191 |
| ENSMUSG00000108255 | Gm16499       | 0.004047884 | 28.04658308 |
| ENSMUSG00000108291 | Gm44292       | 0.004153633 | 0.224436734 |
| ENSMUSG00000108691 | Gm45226       | 0.007497045 | 35.84781607 |
| ENSMUSG00000108695 | Gm2511        | 0.002544051 | 0.231985273 |
| ENSMUSG00000108950 | 9130015G15Rik | 3.42E-17    | 5.612155047 |
| ENSMUSG00000109251 | E230032D23Rik | 2.21E-06    | 0.178924674 |
| ENSMUSG00000109674 | Gm45470       | 0.003513881 | 6.600834956 |
| ENSMUSG00000110266 | Gm32742       | 0.001409311 | 6.084971847 |
| ENSMUSG00000110397 | Gm45540       | 3.41E-08    | 8.452724111 |
| ENSMUSG00000112023 | Lilr4b        | 3.69E-17    | 0.243339792 |
| ENSMUSG00000112129 | Pbld1         | 0.001069303 | 7.002536749 |
| ENSMUSG00000112146 | Gm46210       | 3.06E-05    | 0.091378979 |
| ENSMUSG00000112762 | 4930459C07Rik | 0.000114755 | 0.1323854   |
| ENSMUSG00000113106 | Gm47139       | 0.000568715 | 9.079746237 |
| ENSMUSG00000113701 | B230303A05Rik | 8.46E-15    | 0.118919241 |
| ENSMUSG00000113960 | 4933412O06Rik | 2.88E-07    | 0.059065617 |
| ENSMUSG00000114161 | Gm48662       | 0.00048608  | 4.747302045 |
| ENSMUSG00000114245 | Gm38655       | 1.52E-05    | 5.19517975  |
| ENSMUSG00000115153 | Gm49240       | 0.003654285 | 47.7848164  |
| ENSMUSG00000115919 | Gm31583       | 0.004281737 | 0.184554852 |
| ENSMUSG00000115946 | Mirt2         | 0.006047899 | 0.19581     |
| ENSMUSG00000116657 | AC127341.3    | 0.001953441 | 0.241970495 |
| ENSMUSG00000117318 | AC241601.2    | 0.004219055 | 0.1831127   |

**List 3. Differentially Expressed Genes that are common between Nondiabetic, A. f vs Diabetic, A. f and between Diabetic+DMOG, A. f vs Diabetic, A. f**

| gene id            | gene name | padj (diabetic vs nondiabetic) | Fold-Change (diabetic vs nondiabetic) | padj (DMOG vs vehicle) | Fold-Change (DMOG vs vehicle) |
|--------------------|-----------|--------------------------------|---------------------------------------|------------------------|-------------------------------|
| ENSMUSG00000000031 | H19       | 0.009985938                    | 0.166051202                           | 1.32E-05               | 11.01150343                   |
| ENSMUSG00000000204 | Slfn4     | 1.30E-11                       | 43.93092057                           | 0.004742932            | 0.193554861                   |
| ENSMUSG00000000982 | Ccl3      | 4.29E-31                       | 265.3431412                           | 6.83E-07               | 0.109129139                   |
| ENSMUSG00000000983 | Wfdc18    | 3.26E-05                       | 98.1432878                            | 0.006818173            | 0.161590382                   |
| ENSMUSG00000001131 | Timp1     | 7.10E-191                      | 81.05246061                           | 6.55E-18               | 0.208331927                   |
| ENSMUSG00000001156 | Mxd1      | 1.21E-62                       | 10.66813084                           | 1.51E-26               | 0.219501448                   |
| ENSMUSG00000001865 | Cpa3      | 1.38E-05                       | 0.194535534                           | 0.000374254            | 4.085676331                   |
| ENSMUSG00000002588 | Pon1      | 2.06E-68                       | 0.060837085                           | 8.59E-21               | 4.88196508                    |
| ENSMUSG00000003477 | Inmt      | 3.55E-25                       | 0.101976957                           | 2.73E-21               | 6.761238303                   |
| ENSMUSG00000004035 | Gstm7     | 8.48E-06                       | 0.249433326                           | 1.63E-07               | 4.633950739                   |
| ENSMUSG00000004371 | Il11      | 6.16E-05                       | 5.439592966                           | 2.89E-05               | 0.186995547                   |
| ENSMUSG00000004814 | Ccl24     | 4.61E-09                       | 7.520270475                           | 7.33E-06               | 0.212934934                   |
| ENSMUSG00000005054 | Cstb      | 3.13E-41                       | 12.00865313                           | 6.44E-14               | 0.237706494                   |
| ENSMUSG00000005057 | Sh2b2     | 1.11E-44                       | 27.24464566                           | 1.85E-12               | 0.198686397                   |
| ENSMUSG00000005320 | Fgfr4     | 8.73E-11                       | 0.154631943                           | 1.92E-07               | 4.065607136                   |
| ENSMUSG00000005547 | Cyp2a5    | 2.18E-08                       | 0.067534238                           | 2.10E-09               | 4.851691725                   |
| ENSMUSG00000005800 | Mmp8      | 4.20E-08                       | 35.91504923                           | 0.00477947             | 0.187180721                   |
| ENSMUSG00000006269 | Atp6v1b1  | 3.13E-14                       | 0.028232776                           | 1.30E-09               | 23.47181641                   |
| ENSMUSG00000006403 | Adamts4   | 3.38E-69                       | 65.687058                             | 3.71E-12               | 0.160703746                   |
| ENSMUSG00000006567 | Atp7b     | 3.30E-10                       | 0.246868054                           | 1.45E-15               | 4.925891867                   |
| ENSMUSG00000006724 | Cyp27b1   | 0.000816855                    | 18.41560312                           | 0.001422969            | 0.086972505                   |
| ENSMUSG00000007279 | Scube2    | 1.92E-30                       | 0.119835292                           | 3.63E-27               | 5.608852036                   |
| ENSMUSG00000007946 | Phox2a    | 1.34E-08                       | 117.5994875                           | 1.67E-05               | 0.146686051                   |
| ENSMUSG00000010651 | Acaa1b    | 6.47E-16                       | 0.084690655                           | 0.000169863            | 4.073623774                   |
| ENSMUSG00000014782 | Plekhg4   | 8.67E-05                       | 8.257345956                           | 0.000202482            | 0.148470804                   |
| ENSMUSG00000015354 | Pcolce2   | 3.01E-32                       | 0.089416776                           | 2.77E-16               | 4.948629167                   |
| ENSMUSG00000016349 | Eef1a2    | 1.35E-06                       | 0.119978207                           | 0.001517209            | 4.791931302                   |
| ENSMUSG00000016496 | Cd274     | 5.61E-39                       | 22.42449759                           | 4.02E-14               | 0.148503956                   |
| ENSMUSG00000016529 | Il10      | 3.91E-08                       | 129.1821376                           | 9.73E-06               | 0.105488266                   |
| ENSMUSG00000017002 | Slpi      | 1.12E-29                       | 19.92518516                           | 7.56E-05               | 0.161741835                   |
| ENSMUSG00000018566 | Slc2a4    | 0.001453651                    | 0.24170566                            | 3.92E-06               | 4.339252065                   |
| ENSMUSG00000018893 | Mb        | 3.28E-06                       | 0.015254189                           | 6.93E-08               | 15.51386395                   |
| ENSMUSG00000018930 | Ccl4      | 5.00E-96                       | 230.4394182                           | 4.73E-26               | 0.059414395                   |
| ENSMUSG00000019850 | Tnfaip3   | 1.05E-63                       | 15.09667011                           | 2.49E-17               | 0.213885176                   |
| ENSMUSG00000019905 | Gprc6a    | 4.08E-05                       | 0.242027467                           | 1.08E-08               | 4.718291091                   |
| ENSMUSG00000020096 | Tbata     | 8.81E-07                       | 0.076197917                           | 0.000383542            | 6.898569231                   |
| ENSMUSG00000020182 | Ddc       | 2.07E-07                       | 0.173299449                           | 1.03E-07               | 5.492045089                   |
| ENSMUSG00000020218 | Wif1      | 5.98E-09                       | 0.11821602                            | 2.38E-05               | 5.619550546                   |
| ENSMUSG00000020227 | Irak3     | 5.06E-29                       | 10.07713264                           | 7.17E-10               | 0.243590802                   |
| ENSMUSG00000020251 | Glt8d2    | 3.12E-13                       | 0.106555363                           | 1.02E-08               | 5.375513883                   |
| ENSMUSG00000020334 | Slc22a4   | 8.65E-23                       | 24.49985099                           | 6.62E-07               | 0.220625056                   |
| ENSMUSG00000020407 | Upp1      | 8.26E-27                       | 8.082492153                           | 8.67E-43               | 0.178490508                   |
| ENSMUSG00000020431 | Adcy1     | 5.61E-10                       | 0.04346502                            | 4.77E-05               | 11.4013578                    |

## List 3 continued

|                    |         |             |             |             |             |
|--------------------|---------|-------------|-------------|-------------|-------------|
| ENSMUSG00000020524 | Gria1   | 4.46E-09    | 0.169055063 | 2.30E-08    | 4.836321568 |
| ENSMUSG00000020620 | Abca8b  | 1.77E-13    | 0.192922147 | 1.09E-10    | 4.029208739 |
| ENSMUSG00000020641 | Rsad2   | 1.21E-06    | 32.12861469 | 0.002926344 | 0.097917937 |
| ENSMUSG00000020826 | Nos2    | 6.25E-68    | 61.91897814 | 5.29E-26    | 0.06849956  |
| ENSMUSG00000020990 | Cdk11   | 1.75E-05    | 0.204908478 | 4.66E-06    | 4.242820768 |
| ENSMUSG00000021055 | Esr2    | 6.34E-07    | 0.179905474 | 2.73E-05    | 4.019367421 |
| ENSMUSG00000021198 | Unc79   | 2.16E-06    | 0.130085172 | 3.45E-06    | 6.293882747 |
| ENSMUSG00000021278 | Amn     | 0.003383318 | 15.4400543  | 0.008587908 | 0.12536013  |
| ENSMUSG00000021281 | Tnfaip2 | 1.05E-79    | 13.25759319 | 1.83E-25    | 0.231980835 |
| ENSMUSG00000021322 | Aoah    | 6.94E-48    | 26.02086521 | 6.36E-37    | 0.230843126 |
| ENSMUSG00000021591 | Glrx    | 3.15E-23    | 7.042394205 | 2.39E-12    | 0.242473012 |
| ENSMUSG00000022026 | Olfm4   | 1.33E-05    | 28.67562233 | 0.00013823  | 0.167040911 |
| ENSMUSG00000022126 | Acod1   | 1.21E-229   | 1697.405047 | 8.36E-41    | 0.103658522 |
| ENSMUSG00000022206 | Npr3    | 9.04E-19    | 0.160647997 | 1.38E-09    | 4.12674082  |
| ENSMUSG00000022262 | Dnah5   | 5.10E-09    | 0.198980719 | 4.97E-09    | 4.671790504 |
| ENSMUSG00000022304 | Dpys    | 6.37E-05    | 20.33597147 | 0.001077072 | 0.188888367 |
| ENSMUSG00000022367 | Has2    | 6.60E-06    | 13.89308569 | 0.002703001 | 0.184819854 |
| ENSMUSG00000022534 | Mefv    | 3.64E-37    | 33.73451435 | 4.08E-22    | 0.215845775 |
| ENSMUSG00000022586 | Ly6i    | 1.83E-99    | 123.3372728 | 5.16E-14    | 0.188039247 |
| ENSMUSG00000022758 | P2rx6   | 6.02E-14    | 0.136562152 | 7.17E-13    | 6.076360748 |
| ENSMUSG00000022759 | Lrrc74b | 1.80E-09    | 0.18044745  | 6.40E-10    | 4.584088678 |
| ENSMUSG00000023011 | Faim2   | 1.11E-19    | 0.102925282 | 1.17E-14    | 6.599861403 |
| ENSMUSG00000023349 | Clec4n  | 4.50E-56    | 33.75549839 | 1.27E-14    | 0.217633918 |
| ENSMUSG00000023913 | Pla2g7  | 1.07E-68    | 29.46701967 | 2.32E-26    | 0.225761091 |
| ENSMUSG00000024008 | Cpnc5   | 1.88E-12    | 0.088383877 | 0.007401267 | 4.202342644 |
| ENSMUSG00000024041 | Cryaa   | 0.001272025 | 0.161369426 | 0.007225085 | 4.892408062 |
| ENSMUSG00000024401 | Tnf     | 7.43E-128   | 368.3201252 | 3.58E-27    | 0.081748552 |
| ENSMUSG00000024679 | Ms4a6d  | 3.93E-43    | 18.99537541 | 1.01E-19    | 0.217530949 |
| ENSMUSG00000024737 | Slc15a3 | 5.98E-80    | 12.92728355 | 3.67E-32    | 0.227624141 |
| ENSMUSG00000024774 | Ankrd22 | 1.10E-06    | 14.57313389 | 0.00398197  | 0.24565208  |
| ENSMUSG00000024798 | Htr7    | 7.88E-26    | 20.21591029 | 3.94E-11    | 0.146762809 |
| ENSMUSG00000024953 | Prdx5   | 5.63E-63    | 8.541310834 | 4.91E-51    | 0.192938074 |
| ENSMUSG00000025044 | Msr1    | 1.51E-115   | 65.15012469 | 2.57E-20    | 0.215709157 |
| ENSMUSG00000025165 | Sectm1a | 1.67E-06    | 20.86993407 | 0.009218806 | 0.244787935 |
| ENSMUSG00000025318 | Jph3    | 3.26E-06    | 13.7285589  | 0.000121111 | 0.198799364 |
| ENSMUSG00000025383 | Il23a   | 1.19E-16    | 50.78814098 | 4.65E-11    | 0.144711817 |
| ENSMUSG00000025479 | Cyp2e1  | 7.82E-05    | 0.056338338 | 8.11E-05    | 6.538174913 |
| ENSMUSG00000025746 | Il6     | 4.75E-13    | 128.5313558 | 1.08E-05    | 0.082454048 |
| ENSMUSG00000025789 | St8sia2 | 3.41E-09    | 0.171713603 | 2.06E-06    | 4.439622575 |
| ENSMUSG00000025854 | Fam20c  | 3.01E-27    | 9.143303908 | 4.43E-12    | 0.22996691  |
| ENSMUSG00000025877 | Hk3     | 5.24E-99    | 37.003006   | 2.82E-24    | 0.203895381 |
| ENSMUSG00000025936 | Gm4956  | 9.24E-13    | 0.136203951 | 5.44E-08    | 4.664401332 |
| ENSMUSG00000026073 | Il1r2   | 1.27E-69    | 95.9813252  | 2.96E-11    | 0.190130736 |
| ENSMUSG00000026177 | Slc11a1 | 3.33E-82    | 36.07569496 | 2.63E-13    | 0.232333606 |

## List 3 continued

|                    |          |             |             |             |             |
|--------------------|----------|-------------|-------------|-------------|-------------|
| ENSMUSG00000026358 | Rgs1     | 1.55E-31    | 21.41536675 | 2.79E-08    | 0.203612789 |
| ENSMUSG00000026475 | Rgs16    | 2.87E-21    | 10.98402608 | 7.30E-18    | 0.180110538 |
| ENSMUSG00000026536 | Ifi211   | 1.67E-07    | 17.85386194 | 0.000545332 | 0.15157194  |
| ENSMUSG00000026580 | Selp     | 2.28E-35    | 11.34401679 | 1.18E-20    | 0.214382646 |
| ENSMUSG00000026582 | Sele     | 3.91E-16    | 9.750339672 | 1.13E-13    | 0.112159079 |
| ENSMUSG00000026676 | Ccdc3    | 0.000798567 | 0.056221337 | 0.009630676 | 11.13416121 |
| ENSMUSG00000026691 | Fmo3     | 3.20E-18    | 0.080384481 | 3.47E-08    | 5.262275123 |
| ENSMUSG00000026768 | Itga8    | 5.19E-25    | 0.166650067 | 3.58E-27    | 5.878007999 |
| ENSMUSG00000026981 | Il1rn    | 6.18E-180   | 100.7363338 | 2.87E-15    | 0.174795811 |
| ENSMUSG00000026984 | Il1f6    | 2.17E-05    | 135.1112892 | 0.000363903 | 0.013949402 |
| ENSMUSG00000027398 | Il1b     | 7.90E-59    | 46.71511426 | 1.67E-24    | 0.117804928 |
| ENSMUSG00000027399 | Il1a     | 1.06E-100   | 95.66406742 | 1.39E-24    | 0.090170443 |
| ENSMUSG00000027442 | Cst8     | 6.85E-18    | 0.023804885 | 5.20E-05    | 11.04608557 |
| ENSMUSG00000027513 | Pck1     | 1.86E-05    | 0.052631554 | 0.008895282 | 11.34351509 |
| ENSMUSG00000027514 | Zbp1     | 7.62E-06    | 14.29554446 | 0.007905012 | 0.205911488 |
| ENSMUSG00000027559 | Car3     | 9.46E-23    | 0.037233943 | 3.24E-05    | 8.707795397 |
| ENSMUSG00000027560 | Dok5     | 6.17E-05    | 25.63412077 | 4.80E-05    | 0.08832037  |
| ENSMUSG00000027611 | Procr    | 1.68E-44    | 13.332059   | 2.90E-20    | 0.205637375 |
| ENSMUSG00000027737 | Slc7a11  | 3.30E-134   | 267.9960415 | 1.53E-09    | 0.211425806 |
| ENSMUSG00000027776 | Il12a    | 7.67E-13    | 6.606409415 | 1.19E-13    | 0.152218752 |
| ENSMUSG00000027832 | Ptx3     | 4.69E-07    | 38.25712855 | 6.75E-06    | 0.082483511 |
| ENSMUSG00000028270 | Gbp2     | 0.000106504 | 12.11334918 | 0.003526202 | 0.152023138 |
| ENSMUSG00000028356 | Ambp     | 1.11E-05    | 21.64944276 | 0.000251341 | 0.115395623 |
| ENSMUSG00000028364 | Tnc      | 6.46E-85    | 14.4160296  | 1.39E-11    | 0.234171885 |
| ENSMUSG00000028488 | Sh3gl2   | 4.30E-11    | 0.089501607 | 1.58E-05    | 6.001900743 |
| ENSMUSG00000028599 | Tnfrsf1b | 2.43E-80    | 16.38198225 | 1.65E-24    | 0.236599915 |
| ENSMUSG00000028602 | Tnfrsf8  | 1.20E-27    | 22.61613691 | 1.52E-10    | 0.202344864 |
| ENSMUSG00000028730 | Cfap57   | 6.24E-14    | 0.158895753 | 8.48E-14    | 4.846697159 |
| ENSMUSG00000028940 | Hes2     | 1.37E-14    | 0.01987271  | 0.000601265 | 9.811923482 |
| ENSMUSG00000028996 | Rbp7     | 0.000353119 | 0.116509519 | 0.00172218  | 6.458536177 |
| ENSMUSG00000029082 | Bst1     | 1.08E-63    | 10.95796274 | 2.24E-35    | 0.227576107 |
| ENSMUSG00000029273 | Sult1d1  | 3.29E-05    | 0.06749397  | 1.22E-06    | 6.149668205 |
| ENSMUSG00000029371 | Cxcl5    | 0.00027586  | 25.58258012 | 2.00E-16    | 0.135063534 |
| ENSMUSG00000029377 | Ereg     | 5.90E-15    | 29.18604353 | 2.63E-06    | 0.158908027 |
| ENSMUSG00000029379 | Cxcl3    | 1.08E-24    | 1088.523538 | 9.13E-09    | 0.209041893 |
| ENSMUSG00000029380 | Cxcl1    | 8.74E-62    | 118.7823175 | 2.36E-15    | 0.095824333 |
| ENSMUSG00000029417 | Cxcl9    | 5.53E-08    | 99.62982301 | 0.00626627  | 0.111104922 |
| ENSMUSG00000029819 | Npy      | 0.000201484 | 76.13465475 | 0.006477309 | 0.0918083   |
| ENSMUSG00000029843 | Slc13a4  | 8.28E-09    | 0.129408724 | 7.07E-05    | 4.68235823  |
| ENSMUSG00000029915 | Clec5a   | 3.50E-141   | 62.39076324 | 5.46E-27    | 0.165471778 |
| ENSMUSG00000030048 | Gkn3     | 6.80E-06    | 0.052958704 | 0.000816303 | 10.82836953 |
| ENSMUSG00000030069 | Prok2    | 7.08E-11    | 454.7258137 | 1.41E-08    | 0.094407961 |
| ENSMUSG00000030087 | Klf15    | 1.07E-19    | 0.205281152 | 1.47E-36    | 5.231376662 |
| ENSMUSG00000030108 | Slc6a13  | 2.69E-11    | 99.7393417  | 1.06E-06    | 0.243890895 |



## List 3 continued

|                    |               |             |             |             |             |
|--------------------|---------------|-------------|-------------|-------------|-------------|
| ENSMUSG00000030125 | Lrrc23        | 4.45E-13    | 0.212705449 | 1.28E-08    | 4.431117824 |
| ENSMUSG00000030142 | Clec4e        | 2.24E-128   | 241.3105668 | 1.56E-24    | 0.130964363 |
| ENSMUSG00000030144 | Clec4d        | 4.92E-75    | 96.47048929 | 6.85E-13    | 0.155089729 |
| ENSMUSG00000030268 | Bcat1         | 0.000133207 | 15.03273861 | 0.009265841 | 0.246337743 |
| ENSMUSG00000030278 | Cidec         | 1.78E-18    | 0.069135367 | 8.82E-07    | 5.113456719 |
| ENSMUSG00000030302 | Atp2b2        | 2.47E-13    | 0.107286349 | 7.42E-08    | 6.319952654 |
| ENSMUSG00000030399 | Ckm           | 6.86E-06    | 0.009655962 | 0.002862428 | 34.21278097 |
| ENSMUSG00000030402 | Ppm1n         | 1.15E-06    | 23.13707331 | 4.66E-06    | 0.099717723 |
| ENSMUSG00000030470 | Csrp3         | 5.33E-12    | 0.051141131 | 1.11E-11    | 13.61880722 |
| ENSMUSG00000030495 | Slc7a10       | 5.12E-15    | 0.116617817 | 2.74E-08    | 4.9324912   |
| ENSMUSG00000030546 | Plin1         | 2.81E-05    | 0.070892409 | 0.005754904 | 9.015547941 |
| ENSMUSG00000030737 | Slco2b1       | 3.10E-08    | 0.249515092 | 3.33E-17    | 4.610214771 |
| ENSMUSG00000031104 | Rab33a        | 0.000617015 | 11.73471111 | 0.007330699 | 0.193299119 |
| ENSMUSG00000031163 | Glod5         | 0.000572794 | 19.14692167 | 0.002749641 | 0.084854603 |
| ENSMUSG00000031294 | D630029K05Rik | 8.61E-05    | 0.154713002 | 0.001652566 | 4.446368812 |
| ENSMUSG00000031444 | F10           | 8.34E-95    | 51.78242703 | 7.96E-27    | 0.140170875 |
| ENSMUSG00000031461 | Myom2         | 3.98E-05    | 0.104289638 | 7.33E-08    | 11.64152042 |
| ENSMUSG00000031554 | Adam5         | 0.000137313 | 0.058030505 | 0.003774595 | 11.78908173 |
| ENSMUSG00000031725 | Ces1f         | 6.29E-21    | 0.014239424 | 4.95E-08    | 18.17853204 |
| ENSMUSG00000031870 | Pgr           | 2.28E-11    | 0.095675478 | 2.60E-05    | 4.051384332 |
| ENSMUSG00000031881 | Cdh16         | 1.31E-10    | 0.201810819 | 1.07E-12    | 4.199310776 |
| ENSMUSG00000031966 | Glb1l3        | 6.54E-05    | 0.119032399 | 0.002653691 | 5.424934709 |
| ENSMUSG00000032315 | Cyp1a1        | 0.002869363 | 0.080778694 | 3.29E-28    | 13.5133289  |
| ENSMUSG00000032487 | Ptgs2         | 5.53E-12    | 6.263341608 | 8.06E-10    | 0.22992373  |
| ENSMUSG00000032532 | Cck           | 0.000244202 | 71.39567193 | 0.004632294 | 0.049469097 |
| ENSMUSG00000032661 | Oas3          | 1.89E-08    | 16.74428331 | 0.004412565 | 0.205495833 |
| ENSMUSG00000032691 | Nlrp3         | 4.94E-63    | 30.45240139 | 4.61E-16    | 0.203978559 |
| ENSMUSG00000032925 | Itgbl1        | 7.54E-10    | 0.105203708 | 0.000107974 | 5.022455484 |
| ENSMUSG00000032942 | Ucp3          | 4.92E-08    | 0.108652559 | 2.90E-06    | 7.291944174 |
| ENSMUSG00000033207 | Mamdc2        | 6.95E-19    | 0.158833594 | 1.06E-18    | 5.851643921 |
| ENSMUSG00000033213 | AA467197      | 3.39E-206   | 164.3650773 | 4.92E-34    | 0.133402737 |
| ENSMUSG00000033508 | Asprv1        | 2.12E-17    | 140.8372685 | 0.001830273 | 0.129917584 |
| ENSMUSG00000033644 | Piwil2        | 8.17E-29    | 32.1708933  | 2.03E-07    | 0.219115488 |
| ENSMUSG00000034226 | Rhov          | 4.68E-32    | 18.09076045 | 2.76E-12    | 0.179372626 |
| ENSMUSG00000034391 | Fbxo15        | 0.000730854 | 5.85726711  | 0.00191754  | 0.184446458 |
| ENSMUSG00000034416 | Pkd1l2        | 7.41E-06    | 15.17779501 | 0.0070866   | 0.222402271 |
| ENSMUSG00000034855 | Cxcl10        | 5.60E-11    | 178.795138  | 2.95E-05    | 0.050853551 |
| ENSMUSG00000035186 | Ubd           | 1.76E-11    | 150.9277132 | 1.27E-05    | 0.053814305 |
| ENSMUSG00000035208 | Slfn8         | 4.75E-05    | 8.353439853 | 0.009290678 | 0.23864066  |
| ENSMUSG00000035296 | Sgcg          | 2.85E-05    | 0.116100079 | 2.46E-05    | 7.444996392 |
| ENSMUSG00000035352 | Ccl12         | 4.38E-30    | 22.2673239  | 2.46E-08    | 0.221482926 |
| ENSMUSG00000035373 | Ccl7          | 5.09E-14    | 84.49006544 | 1.19E-14    | 0.1001819   |
| ENSMUSG00000035385 | Ccl2          | 9.08E-109   | 202.4628751 | 5.44E-35    | 0.109975304 |
| ENSMUSG00000035407 | Kank4         | 2.43E-25    | 0.10803296  | 1.27E-10    | 4.132778603 |

## List 3 continued

|                    |          |             |             |             |             |
|--------------------|----------|-------------|-------------|-------------|-------------|
| ENSMUSG00000035486 | Plk5     | 1.11E-06    | 0.086158371 | 0.001513051 | 6.805192283 |
| ENSMUSG00000035686 | Thrsp    | 8.85E-12    | 0.07027376  | 3.40E-06    | 5.344900633 |
| ENSMUSG00000035692 | Isg15    | 0.001002914 | 11.70461549 | 0.002672999 | 0.119481795 |
| ENSMUSG00000035910 | Dcdc2a   | 1.01E-13    | 0.073129947 | 4.77E-08    | 6.99745827  |
| ENSMUSG00000036095 | Dgkb     | 0.000569245 | 0.123814598 | 0.00366343  | 6.924009533 |
| ENSMUSG00000036931 | Nfkbid   | 1.87E-41    | 14.39227709 | 1.30E-11    | 0.218189854 |
| ENSMUSG00000037477 | Tbx10    | 0.00096279  | 71.21764626 | 0.00562314  | 0.02647108  |
| ENSMUSG00000037492 | Zmat4    | 0.000305685 | 0.109756143 | 6.65E-06    | 11.59976159 |
| ENSMUSG00000037613 | Tnfrsf23 | 3.93E-44    | 23.59447379 | 2.27E-10    | 0.233335761 |
| ENSMUSG00000037771 | Slc32a1  | 0.000332876 | 12.50054815 | 0.004926946 | 0.181148722 |
| ENSMUSG00000037872 | Ackr1    | 1.79E-09    | 21.34661068 | 9.90E-05    | 0.195025572 |
| ENSMUSG00000037966 | Ninj1    | 1.89E-56    | 12.36496983 | 9.37E-18    | 0.206922385 |
| ENSMUSG00000037973 | Ccdc129  | 1.27E-20    | 0.075755043 | 7.37E-05    | 4.332825264 |
| ENSMUSG00000038037 | Socs1    | 8.13E-05    | 9.37668876  | 0.001058261 | 0.154410871 |
| ENSMUSG00000038067 | Csf3     | 5.56E-30    | 158.6740026 | 4.45E-06    | 0.061818728 |
| ENSMUSG00000038756 | Till6    | 1.53E-08    | 0.104235828 | 2.81E-07    | 6.358491421 |
| ENSMUSG00000038791 | Scgb3a2  | 6.31E-49    | 0.084987913 | 9.22E-15    | 4.705821326 |
| ENSMUSG00000039084 | Chad     | 9.58E-19    | 0.131853751 | 2.14E-08    | 4.474972991 |
| ENSMUSG00000039196 | Orml     | 1.18E-129   | 339.8874892 | 1.43E-25    | 0.224216958 |
| ENSMUSG00000039257 | Vstm2b   | 3.62E-05    | 0.048045778 | 0.00219286  | 11.9378852  |
| ENSMUSG00000039395 | Mreg     | 3.68E-14    | 31.9637136  | 2.55E-13    | 0.17115876  |
| ENSMUSG00000039883 | Lrrc17   | 0.000616637 | 0.243811091 | 6.59E-05    | 4.211412399 |
| ENSMUSG00000040026 | Saa3     | 0           | 2579.781229 | 3.92E-22    | 0.172660624 |
| ENSMUSG00000040752 | Myh6     | 0.000241843 | 0.10771726  | 4.75E-05    | 11.22829958 |
| ENSMUSG00000040838 | Gm11639  | 1.00E-05    | 93.57545051 | 8.14E-06    | 0.048298537 |
| ENSMUSG00000041324 | Inhba    | 2.04E-157   | 121.9329236 | 1.17E-23    | 0.20114505  |
| ENSMUSG00000041423 | Paqr6    | 2.61E-05    | 0.226259601 | 8.35E-07    | 4.838055437 |
| ENSMUSG00000041624 | Gucy1a2  | 1.84E-06    | 0.231400058 | 6.01E-09    | 4.392926062 |
| ENSMUSG00000041644 | Slc5a12  | 1.29E-15    | 0.067321523 | 0.000887734 | 5.113274032 |
| ENSMUSG00000041827 | Oasl1    | 1.49E-05    | 16.86862713 | 0.008794306 | 0.160914479 |
| ENSMUSG00000041828 | Abca8a   | 7.14E-07    | 0.09744596  | 1.22E-08    | 5.502449697 |
| ENSMUSG00000042109 | Csdc2    | 6.37E-06    | 0.166999964 | 6.15E-06    | 5.638014188 |
| ENSMUSG00000042254 | Cilp     | 5.22E-05    | 0.18413199  | 6.00E-05    | 8.175059727 |
| ENSMUSG00000042265 | Trem1    | 1.43E-34    | 30.16019343 | 1.22E-09    | 0.193619862 |
| ENSMUSG00000042349 | Ikbke    | 1.72E-60    | 14.93557055 | 8.49E-31    | 0.215876167 |
| ENSMUSG00000042529 | Kcnj12   | 6.86E-05    | 0.197216587 | 0.000171362 | 4.155822795 |
| ENSMUSG00000042793 | Lgr6     | 2.70E-07    | 0.148347672 | 8.29E-07    | 5.808785189 |
| ENSMUSG00000043333 | Rhbdl2   | 0.000204594 | 7.457430182 | 0.001071886 | 0.219876023 |
| ENSMUSG00000043496 | Tril     | 2.05E-22    | 0.123317141 | 1.52E-18    | 4.56183954  |
| ENSMUSG00000043631 | Ecm2     | 1.33E-12    | 0.14508143  | 8.78E-09    | 4.554204118 |
| ENSMUSG00000043953 | Ccr12    | 7.88E-56    | 7.891245465 | 2.72E-36    | 0.18513749  |
| ENSMUSG00000044103 | Il1f9    | 2.50E-25    | 87.98827565 | 3.02E-05    | 0.153107071 |
| ENSMUSG00000044156 | Hepacam2 | 4.12E-10    | 0.109646117 | 0.000539943 | 4.02448736  |
| ENSMUSG00000044352 | Sowaha   | 0.000802532 | 0.18377971  | 0.000837182 | 5.199540532 |

## List 3 continued

|                    |          |             |             |             |             |
|--------------------|----------|-------------|-------------|-------------|-------------|
| ENSMUSG00000044365 | Cxxc4    | 2.29E-06    | 0.11928619  | 0.000275655 | 5.309090454 |
| ENSMUSG00000044701 | Il27     | 7.98E-08    | 14.75646657 | 4.35E-06    | 0.131962006 |
| ENSMUSG00000044903 | Psg22    | 0.00046084  | 49.99361793 | 0.004566425 | 0.108123474 |
| ENSMUSG00000044951 | Mylk4    | 2.64E-05    | 0.051901524 | 0.004549182 | 8.655175509 |
| ENSMUSG00000045027 | Prss22   | 2.14E-07    | 18.39268603 | 0.000346826 | 0.205009629 |
| ENSMUSG00000045362 | Tnfsf26  | 2.97E-53    | 25.28811422 | 1.57E-13    | 0.219845486 |
| ENSMUSG00000045381 | Olfir433 | 0.004643729 | 8.296292642 | 0.00237161  | 0.116784929 |
| ENSMUSG00000045502 | Hear2    | 9.33E-212   | 138.5769777 | 3.13E-22    | 0.161589607 |
| ENSMUSG00000045551 | Fpr1     | 8.31E-21    | 12.20254813 | 2.02E-11    | 0.16264979  |
| ENSMUSG00000045875 | Adra1a   | 7.29E-12    | 0.209171927 | 6.17E-17    | 4.055325929 |
| ENSMUSG00000045915 | Ccdc42   | 1.38E-05    | 0.163779785 | 0.000434986 | 4.845972974 |
| ENSMUSG00000046093 | Hpcal4   | 1.41E-13    | 0.024406153 | 0.000614651 | 8.465944773 |
| ENSMUSG00000046182 | Gsg11    | 2.68E-08    | 0.048168686 | 1.08E-05    | 14.90927748 |
| ENSMUSG00000046610 | Oacyl    | 5.53E-09    | 11.94195793 | 2.59E-06    | 0.211335435 |
| ENSMUSG00000046618 | Olfml2a  | 4.92E-18    | 0.15710071  | 5.61E-12    | 4.768951546 |
| ENSMUSG00000047021 | Cfap65   | 3.41E-09    | 0.197371919 | 5.59E-10    | 4.564098226 |
| ENSMUSG00000047443 | Erfe     | 2.02E-07    | 10.60548165 | 0.000186342 | 0.185781701 |
| ENSMUSG00000047945 | Marcks11 | 1.92E-69    | 18.10556067 | 4.59E-38    | 0.146296664 |
| ENSMUSG00000048038 | Ccdc187  | 5.06E-15    | 0.168650469 | 3.21E-15    | 4.384338451 |
| ENSMUSG00000048621 | Gm6377   | 7.42E-20    | 11.36624798 | 1.16E-09    | 0.205444998 |
| ENSMUSG00000048752 | Prss50   | 0.00715867  | 4.236749485 | 0.002992253 | 0.153580059 |
| ENSMUSG00000048834 | Vstm2a   | 2.26E-06    | 0.116550481 | 0.00065559  | 5.710001072 |
| ENSMUSG00000049511 | Htr1b    | 2.86E-07    | 0.119512462 | 0.001262302 | 4.482375327 |
| ENSMUSG00000050089 | Akap4    | 7.02E-09    | 154.155024  | 9.28E-09    | 0.059285019 |
| ENSMUSG00000050097 | Ces2b    | 6.03E-06    | 0.130295888 | 0.000427592 | 5.094247704 |
| ENSMUSG00000050359 | Sprr1a   | 8.12E-08    | 10.12654822 | 0.000688194 | 0.214671204 |
| ENSMUSG00000050395 | Tnfsf15  | 1.52E-23    | 10.28317936 | 8.30E-16    | 0.180601007 |
| ENSMUSG00000050578 | Mmp13    | 3.37E-25    | 20.29990493 | 3.51E-10    | 0.228894864 |
| ENSMUSG00000051439 | Cd14     | 9.47E-48    | 32.52969399 | 1.65E-05    | 0.143146627 |
| ENSMUSG00000051747 | Ttn      | 2.17E-06    | 0.189799951 | 1.42E-10    | 5.176206679 |
| ENSMUSG00000051748 | Wfdc21   | 8.41E-27    | 16.18054827 | 0.000290852 | 0.195746578 |
| ENSMUSG00000051906 | Cd209f   | 1.36E-06    | 0.076787615 | 0.000113136 | 10.05158203 |
| ENSMUSG00000052270 | Fpr2     | 9.85E-46    | 22.71223892 | 1.55E-20    | 0.160780849 |
| ENSMUSG00000052974 | Cyp2f2   | 3.72E-37    | 0.065921921 | 5.69E-15    | 6.554004493 |
| ENSMUSG00000053161 | Daw1     | 0.000682899 | 0.182708394 | 0.005152125 | 4.344707612 |
| ENSMUSG00000053318 | Slamf8   | 7.73E-08    | 21.19083721 | 0.000981936 | 0.154935977 |
| ENSMUSG00000053338 | Tarm1    | 1.68E-58    | 107.2002244 | 3.85E-22    | 0.12474645  |
| ENSMUSG00000053475 | Tnfaip6  | 1.17E-05    | 4.947243573 | 1.85E-06    | 0.181123703 |
| ENSMUSG00000053647 | Gper1    | 8.88E-05    | 0.201738905 | 0.000177658 | 4.596918178 |
| ENSMUSG00000054146 | Krt15    | 0.000370582 | 0.033706211 | 0.000715217 | 24.79606911 |
| ENSMUSG00000054203 | Ifi205   | 4.80E-06    | 18.37378853 | 9.15E-05    | 0.106056353 |
| ENSMUSG00000054422 | Fabp1    | 3.30E-20    | 0.023984029 | 0.000710842 | 8.697051196 |
| ENSMUSG00000054619 | Mettl7a1 | 5.63E-37    | 0.102317165 | 3.39E-12    | 4.267468213 |
| ENSMUSG00000054855 | Rnd1     | 2.83E-12    | 4.206844444 | 1.95E-21    | 0.173703314 |

## List 3 continued

|                    |               |             |             |             |             |
|--------------------|---------------|-------------|-------------|-------------|-------------|
| ENSMUSG00000054905 | Stfa3         | 5.49E-18    | 322.9239368 | 0.000292118 | 0.072935242 |
| ENSMUSG00000055170 | lfng          | 5.81E-08    | 26.07460455 | 0.003114146 | 0.205154598 |
| ENSMUSG00000055368 | Slc6a2        | 1.40E-11    | 0.225910832 | 4.07E-13    | 4.897330345 |
| ENSMUSG00000056054 | S100a8        | 1.33E-08    | 22.40912127 | 8.75E-05    | 0.132725377 |
| ENSMUSG00000056071 | S100a9        | 1.23E-07    | 15.03851638 | 0.002521649 | 0.202527474 |
| ENSMUSG00000056529 | Ptafr         | 8.82E-150   | 50.60019052 | 1.33E-28    | 0.191338705 |
| ENSMUSG00000057182 | Scn3a         | 6.83E-19    | 0.13966351  | 2.26E-19    | 6.740149577 |
| ENSMUSG00000057465 | Saa2          | 1.50E-14    | 390.6209695 | 3.45E-06    | 0.159881304 |
| ENSMUSG00000057606 | Colq          | 1.17E-46    | 0.02647835  | 1.25E-17    | 11.79056778 |
| ENSMUSG00000057933 | Gsta2         | 2.19E-17    | 0.048290108 | 0.001715172 | 5.198246595 |
| ENSMUSG00000058159 | T2            | 0.002795458 | 0.099436358 | 0.005473137 | 8.250821183 |
| ENSMUSG00000058427 | Cxcl2         | 5.98E-33    | 3289.780123 | 0.0001281   | 0.083349823 |
| ENSMUSG00000058755 | Osm           | 1.93E-43    | 50.58503118 | 3.61E-11    | 0.146757167 |
| ENSMUSG00000058914 | C1qtnf3       | 9.86E-07    | 0.040231638 | 0.005661761 | 11.04337    |
| ENSMUSG00000058921 | Slc10a5       | 2.46E-11    | 0.081824546 | 0.00067873  | 4.585211859 |
| ENSMUSG00000059854 | Hydin         | 4.14E-10    | 0.182596109 | 2.40E-09    | 4.633299772 |
| ENSMUSG00000060183 | Cxcl11        | 1.41E-05    | 1333.409081 | 0.00131531  | 0.045257974 |
| ENSMUSG00000061397 | Krt79         | 2.52E-09    | 0.233844395 | 9.55E-13    | 4.889820187 |
| ENSMUSG00000061462 | Obscn         | 9.76E-06    | 0.162171164 | 3.47E-05    | 5.322267972 |
| ENSMUSG00000061576 | Dpp6          | 2.52E-05    | 0.064993648 | 0.003895059 | 7.661661738 |
| ENSMUSG00000061718 | Ppp1r1b       | 1.44E-14    | 0.162034749 | 6.17E-13    | 4.256544195 |
| ENSMUSG00000061780 | Cfd           | 1.14E-08    | 0.054788887 | 0.002698981 | 7.374977259 |
| ENSMUSG00000061959 | Ces1e         | 4.02E-21    | 0.080776986 | 1.93E-06    | 5.052550084 |
| ENSMUSG00000062329 | Cyt11         | 3.15E-37    | 0.052090868 | 4.43E-12    | 7.084536641 |
| ENSMUSG00000062345 | Serp1nb2      | 6.54E-20    | 25.83424101 | 6.03E-12    | 0.107729598 |
| ENSMUSG00000062480 | Acat3         | 2.66E-09    | 12.91404594 | 0.000114596 | 0.229970513 |
| ENSMUSG00000063130 | Calml3        | 1.71E-12    | 0.052703411 | 0.001901396 | 5.037381352 |
| ENSMUSG00000063234 | Gpr84         | 8.96E-21    | 1317.76256  | 2.46E-21    | 0.098857983 |
| ENSMUSG00000063626 | Unc5d         | 0.000166992 | 0.052800718 | 0.00344372  | 11.70289282 |
| ENSMUSG00000065037 | Rn7sk         | 8.16E-07    | 11.71086304 | 0.000109069 | 0.101064076 |
| ENSMUSG00000068263 | Efcc1         | 4.13E-13    | 0.098555974 | 1.76E-05    | 5.168420199 |
| ENSMUSG00000068614 | Actc1         | 0.0001131   | 0.094453962 | 2.36E-08    | 6.213508853 |
| ENSMUSG00000069792 | Wfdc17        | 4.05E-38    | 26.39693598 | 6.71E-14    | 0.177469251 |
| ENSMUSG00000069873 | 4930438A08Rik | 0.000182692 | 23.50902031 | 0.000132369 | 0.060401117 |
| ENSMUSG00000070427 | Il18bp        | 2.37E-20    | 12.37359639 | 2.98E-07    | 0.225274285 |
| ENSMUSG00000070524 | Fcrlb         | 2.99E-37    | 81.89828012 | 5.21E-10    | 0.207435298 |
| ENSMUSG00000072473 | 1700024G13Rik | 2.72E-16    | 0.125294526 | 1.70E-07    | 4.581904071 |
| ENSMUSG00000072620 | Slfn2         | 1.19E-49    | 9.515633288 | 1.51E-26    | 0.242232475 |
| ENSMUSG00000072844 | G530011O06Rik | 5.59E-05    | 18.33122749 | 0.004129984 | 0.134481634 |
| ENSMUSG00000073274 | Gm14636       | 8.62E-05    | 19.58160788 | 0.004488388 | 0.248577927 |
| ENSMUSG00000073489 | Ifi204        | 1.07E-08    | 22.83063086 | 0.001338531 | 0.153930897 |
| ENSMUSG00000074115 | Saa1          | 1.17E-41    | 549.6981917 | 0.003050162 | 0.206878911 |
| ENSMUSG00000074505 | Fat3          | 1.45E-07    | 0.209933866 | 2.44E-05    | 4.009153839 |
| ENSMUSG00000074595 | Wfdc6a        | 0.000208071 | 0.152496862 | 0.00129491  | 5.248116795 |

## List 3 continued

|                    |               |             |             |             |             |
|--------------------|---------------|-------------|-------------|-------------|-------------|
| ENSMUSG00000074981 | Dcdc5         | 2.09E-05    | 0.08519531  | 0.000348263 | 7.591777267 |
| ENSMUSG00000078137 | Ankrd63       | 6.35E-24    | 0.143948768 | 1.30E-17    | 4.752787723 |
| ENSMUSG00000078252 | Krtap17-1     | 2.98E-09    | 0.003470597 | 0.003698087 | 41.18885152 |
| ENSMUSG00000079101 | Esd-ps        | 8.65E-05    | 13.4391246  | 0.006546568 | 0.229466222 |
| ENSMUSG00000079597 | Gm5483        | 4.22E-08    | 59.89311278 | 0.004320481 | 0.159324331 |
| ENSMUSG00000079700 | Fpr3          | 4.67E-09    | 276.7631472 | 1.03E-08    | 0.050711158 |
| ENSMUSG00000081650 | Gm16181       | 2.56E-08    | 12.2105179  | 3.59E-08    | 0.135000288 |
| ENSMUSG00000081664 | Gm15544       | 0.00085286  | 42.97431612 | 0.004295616 | 0.125778817 |
| ENSMUSG00000082976 | Gm15056       | 1.55E-07    | 189.4794036 | 6.30E-06    | 0.06420482  |
| ENSMUSG00000084902 | Gm281         | 2.32E-12    | 0.133838281 | 6.30E-05    | 4.411921832 |
| ENSMUSG00000084941 | Gm11944       | 4.56E-05    | 0.135166656 | 0.000721415 | 5.185919659 |
| ENSMUSG00000084989 | Crocc2        | 1.12E-06    | 0.175726833 | 7.17E-08    | 8.648852964 |
| ENSMUSG00000085295 | 4930430E12Rik | 1.23E-38    | 548.5327233 | 4.81E-23    | 0.171021368 |
| ENSMUSG00000085407 | 1700095J03Rik | 0.001204862 | 0.110848706 | 0.00178392  | 7.982074758 |
| ENSMUSG00000085498 | Gm14023       | 2.70E-08    | 8.602860772 | 6.37E-08    | 0.153589273 |
| ENSMUSG00000086755 | Gm11216       | 0.00013093  | 82.0423011  | 0.00462387  | 0.08536235  |
| ENSMUSG00000086843 | E030013I19Rik | 2.45E-11    | 0.104169103 | 6.72E-07    | 6.574963686 |
| ENSMUSG00000087477 | Gm13822       | 5.62E-08    | 10.91006539 | 3.22E-07    | 0.150808062 |
| ENSMUSG00000089874 | 9230117E06Rik | 0.000127413 | 0.140465861 | 0.000334833 | 5.894619773 |
| ENSMUSG00000090230 | Gm16315       | 7.90E-05    | 19.60547242 | 9.81E-05    | 0.074344961 |
| ENSMUSG00000090257 | Gm4524        | 7.48E-06    | 0.064748871 | 0.003876678 | 7.563568983 |
| ENSMUSG00000092418 | Gm20406       | 1.06E-06    | 38.77691142 | 0.002628028 | 0.16385993  |
| ENSMUSG00000093973 | Mrgpra2a      | 2.57E-09    | 316.9026597 | 2.47E-05    | 0.117469056 |
| ENSMUSG00000094733 | Gm5416        | 6.61E-08    | 34.33204922 | 0.001370557 | 0.149498758 |
| ENSMUSG00000095620 | 2010005H15Rik | 5.07E-08    | 32.62064874 | 0.00010004  | 0.077265274 |
| ENSMUSG00000096719 | Mrgpra2b      | 3.64E-21    | 71.0739483  | 3.55E-07    | 0.115818536 |
| ENSMUSG00000097139 | Gm26626       | 5.26E-09    | 63.84590307 | 0.000225763 | 0.229560203 |
| ENSMUSG00000097418 | Mir155hg      | 6.60E-09    | 13.35425038 | 9.05E-06    | 0.189199065 |
| ENSMUSG00000097453 | Gm26894       | 0.001238872 | 0.201477614 | 0.006387096 | 4.076955691 |
| ENSMUSG00000097504 | 4930516B21Rik | 9.20E-09    | 0.132944482 | 8.05E-05    | 4.245778144 |
| ENSMUSG00000098008 | A930001A20Rik | 0.000194542 | 0.029722809 | 0.000901738 | 25.77830895 |
| ENSMUSG00000102269 | Gm7357        | 0.002619754 | 0.075018065 | 0.000215932 | 15.32338183 |
| ENSMUSG00000102697 | Pcdhac2       | 3.00E-20    | 0.126641353 | 1.09E-08    | 4.380746328 |
| ENSMUSG00000103308 | Gm37800       | 4.40E-08    | 197.6365217 | 0.002001732 | 0.240363453 |
| ENSMUSG00000103588 | Gm18445       | 7.06E-05    | 90.8913337  | 6.21E-05    | 0.010661965 |
| ENSMUSG00000104728 | Gm42462       | 1.51E-29    | 76.54867461 | 1.16E-09    | 0.229445849 |
| ENSMUSG00000104818 | Gm43661       | 2.17E-05    | 37.50054616 | 0.005996952 | 0.182007835 |
| ENSMUSG00000105112 | Gm42778       | 0.000390374 | 0.217649401 | 2.02E-05    | 4.909549148 |
| ENSMUSG00000105357 | Gm42647       | 1.71E-06    | 81.14386275 | 8.39E-06    | 0.083694861 |
| ENSMUSG00000105504 | Gbp5          | 4.62E-06    | 18.73126225 | 0.003314677 | 0.125942953 |
| ENSMUSG00000106609 | Gm43181       | 2.04E-56    | 101.8270521 | 3.99E-17    | 0.168237453 |
| ENSMUSG00000107191 | Gm43579       | 0.004392962 | 0.023834437 | 0.009086609 | 34.60228674 |
| ENSMUSG00000107655 | Gm44220       | 6.10E-18    | 0.086944473 | 7.50E-11    | 5.245017552 |
| ENSMUSG00000108010 | Gm38708       | 0.000232663 | 0.190006271 | 8.86E-06    | 5.30647441  |

## List 3 continued

|                    |               |             |             |             |             |
|--------------------|---------------|-------------|-------------|-------------|-------------|
| ENSMUSG00000108161 | Gm32914       | 0.000515901 | 22.61028395 | 0.003140755 | 0.129779221 |
| ENSMUSG00000108210 | Gm35808       | 7.62E-06    | 95.08709297 | 0.001124329 | 0.209049191 |
| ENSMUSG00000108255 | Gm16499       | 0.001017089 | 0.024471037 | 0.004047884 | 28.04658308 |
| ENSMUSG00000108291 | Gm44292       | 7.90E-05    | 63.9359637  | 0.004153633 | 0.224436734 |
| ENSMUSG00000108695 | Gm2511        | 4.20E-08    | 248.9724355 | 0.002544051 | 0.231985273 |
| ENSMUSG00000108950 | 9130015G15Rik | 1.76E-08    | 0.217414832 | 3.42E-17    | 5.612155047 |
| ENSMUSG00000109251 | E230032D23Rik | 5.70E-13    | 19.1549092  | 2.21E-06    | 0.178924674 |
| ENSMUSG00000109674 | Gm45470       | 0.000221765 | 0.104704547 | 0.003513881 | 6.600834956 |
| ENSMUSG00000110397 | Gm45540       | 2.87E-06    | 0.112018733 | 3.41E-08    | 8.452724111 |
| ENSMUSG00000112023 | Litr4b        | 6.99E-60    | 42.84896477 | 3.69E-17    | 0.243339792 |
| ENSMUSG00000112129 | Pbld1         | 0.000732331 | 0.093369879 | 0.001069303 | 7.002536749 |
| ENSMUSG00000112146 | Gm46210       | 2.68E-05    | 14.21939805 | 3.06E-05    | 0.091378979 |
| ENSMUSG00000112762 | 4930459C07Rik | 1.54E-05    | 81.66365131 | 0.000114755 | 0.1323854   |
| ENSMUSG00000113701 | B230303A05Rik | 1.12E-16    | 255.7173117 | 8.46E-15    | 0.118919241 |
| ENSMUSG00000113960 | 4933412O06Rik | 2.43E-08    | 213.7681453 | 2.88E-07    | 0.059065617 |
| ENSMUSG00000114161 | Gm48662       | 2.94E-09    | 0.105566749 | 0.00048608  | 4.747302045 |
| ENSMUSG00000114245 | Gm38655       | 2.26E-09    | 0.128446341 | 1.52E-05    | 5.19517975  |
| ENSMUSG00000115919 | Gm31583       | 0.00239599  | 32.66660997 | 0.004281737 | 0.184554852 |
| ENSMUSG00000115946 | Mirt2         | 6.79E-07    | 24.81581919 | 0.006047899 | 0.19581     |
| ENSMUSG00000116657 | AC127341.3    | 7.65E-07    | 13.58494023 | 0.001953441 | 0.241970495 |
| ENSMUSG00000117318 | AC241601.2    | 0.000225845 | 16.10299974 | 0.004219055 | 0.1831127   |

**List 4. GSEA, inflammatory response related genes affected by Diabetes**

| gene id            | gene name | padj (diabetic vs nondiabetic) | Fold-Change (diabetic vs nondiabetic) | Rank in gene list | Rank metric score | Running ES | Leading edge subset |
|--------------------|-----------|--------------------------------|---------------------------------------|-------------------|-------------------|------------|---------------------|
| ENSMUSG00000039196 | Orm1      | 1.18E-129                      | 339.8874892                           | 1                 | 4.971             | 0.0302     | Yes                 |
| ENSMUSG00000040026 | Saa3      | 0                              | 2579.781229                           | 4                 | 4.889             | 0.0566     | Yes                 |
| ENSMUSG00000001131 | Timp1     | 7.10E-191                      | 81.05246061                           | 5                 | 4.864             | 0.0892     | Yes                 |
| ENSMUSG00000056529 | Ptafr     | 8.82E-150                      | 50.60019052                           | 6                 | 4.806             | 0.1214     | Yes                 |
| ENSMUSG00000057465 | Saa2      | 1.50E-14                       | 390.6209695                           | 7                 | 4.669             | 0.1528     | Yes                 |
| ENSMUSG00000025383 | Il23a     | 1.19E-16                       | 50.78814098                           | 9                 | 4.508             | 0.1798     | Yes                 |
| ENSMUSG00000021322 | Aoah      | 6.94E-48                       | 26.02086521                           | 13                | 4.338             | 0.1993     | Yes                 |
| ENSMUSG00000029082 | Bst1      | 1.08E-63                       | 10.95796274                           | 19                | 4.165             | 0.2114     | Yes                 |
| ENSMUSG00000035385 | Ccl2      | 9.08E-109                      | 202.4628751                           | 22                | 4.045             | 0.2321     | Yes                 |
| ENSMUSG00000028599 | Tnfrsf1b  | 2.43E-80                       | 16.38198225                           | 26                | 3.959             | 0.2491     | Yes                 |
| ENSMUSG00000023913 | Pla2g7    | 1.07E-68                       | 29.46701967                           | 27                | 3.958             | 0.2757     | Yes                 |
| ENSMUSG00000043953 | Ccr12     | 7.88E-56                       | 7.891245465                           | 31                | 3.877             | 0.2921     | Yes                 |
| ENSMUSG00000026981 | Il1rn     | 6.18E-180                      | 100.7363338                           | 33                | 3.735             | 0.314      | Yes                 |
| ENSMUSG00000022534 | Mefv      | 3.64E-37                       | 33.73451435                           | 35                | 3.723             | 0.3358     | Yes                 |
| ENSMUSG00000026580 | Selp      | 2.28E-35                       | 11.34401679                           | 38                | 3.581             | 0.3534     | Yes                 |
| ENSMUSG00000004814 | Ccl24     | 4.61E-09                       | 7.520270475                           | 42                | 3.417             | 0.3668     | Yes                 |
| ENSMUSG00000019850 | Tnfaip3   | 1.05E-63                       | 15.09667011                           | 44                | 3.362             | 0.3861     | Yes                 |
| ENSMUSG00000052270 | Fpr2      | 9.85E-46                       | 22.71223892                           | 45                | 3.354             | 0.4086     | Yes                 |
| ENSMUSG00000024401 | Tnf       | 7.43E-128                      | 368.3201252                           | 53                | 2.991             | 0.4064     | Yes                 |
| ENSMUSG00000074115 | Saa1      | 1.17E-41                       | 549.6981917                           | 56                | 2.92              | 0.4196     | Yes                 |
| ENSMUSG00000035352 | Ccl12     | 4.38E-30                       | 22.2673239                            | 57                | 2.899             | 0.4391     | Yes                 |
| ENSMUSG00000032691 | Nlrp3     | 4.94E-63                       | 30.45240139                           | 58                | 2.866             | 0.4583     | Yes                 |
| ENSMUSG00000036931 | Nfbid     | 1.87E-41                       | 14.39227709                           | 64                | 2.688             | 0.4604     | Yes                 |
| ENSMUSG00000026177 | Slc11a1   | 3.33E-82                       | 36.07569496                           | 65                | 2.688             | 0.4784     | Yes                 |
| ENSMUSG00000053338 | Tarm1     | 1.68E-58                       | 107.2002244                           | 68                | 2.629             | 0.4897     | Yes                 |
| ENSMUSG00000079700 | Fpr3      | 4.67E-09                       | 276.7631472                           | 82                | 2.377             | 0.4642     | Yes                 |
| ENSMUSG00000029380 | Cxcl1     | 8.74E-62                       | 118.7823175                           | 86                | 2.336             | 0.4703     | Yes                 |
| ENSMUSG00000027399 | Il1a      | 1.06E-100                      | 95.66406742                           | 87                | 2.32              | 0.4859     | Yes                 |
| ENSMUSG00000020826 | Nos2      | 6.25E-68                       | 61.91897814                           | 88                | 2.316             | 0.5014     | Yes                 |
| ENSMUSG00000027398 | Il1b      | 7.90E-59                       | 46.71511426                           | 94                | 2.173             | 0.5001     | Yes                 |
| ENSMUSG00000044103 | Il1f9     | 2.50E-25                       | 87.98827565                           | 102               | 2.035             | 0.4914     | Yes                 |
| ENSMUSG00000018930 | Ccl4      | 5.00E-96                       | 230.4394182                           | 106               | 1.922             | 0.4948     | Yes                 |
| ENSMUSG00000000982 | Ccl3      | 4.29E-31                       | 265.3431412                           | 109               | 1.845             | 0.5008     | Yes                 |
| ENSMUSG00000029379 | Cxcl3     | 1.08E-24                       | 1088.523538                           | 112               | 1.786             | 0.5064     | Yes                 |
| ENSMUSG00000058755 | Osm       | 1.93E-43                       | 50.58503118                           | 113               | 1.785             | 0.5184     | Yes                 |
| ENSMUSG00000029371 | Cxcl5     | 0.00027586                     | 25.58258012                           | 116               | 1.753             | 0.5237     | Yes                 |
| ENSMUSG00000026073 | Il1r2     | 1.27E-69                       | 95.9813252                            | 118               | 1.733             | 0.5322     | Yes                 |
| ENSMUSG00000037872 | Ackr1     | 1.79E-09                       | 21.34661068                           | 130               | 1.643             | 0.5082     | Yes                 |
| ENSMUSG00000042265 | Trem1     | 1.43E-34                       | 30.16019343                           | 131               | 1.631             | 0.5191     | Yes                 |
| ENSMUSG00000051439 | Ccl14     | 9.47E-48                       | 32.52969399                           | 139               | 1.539             | 0.5071     | Yes                 |
| ENSMUSG00000035373 | Ccl7      | 5.09E-14                       | 84.49006544                           | 142               | 1.522             | 0.511      | Yes                 |
| ENSMUSG00000044701 | Il27      | 7.98E-08                       | 14.75646657                           | 144               | 1.514             | 0.5179     | Yes                 |
| ENSMUSG00000045551 | Fpr1      | 8.31E-21                       | 12.20254813                           | 146               | 1.498             | 0.5248     | Yes                 |
| ENSMUSG00000032487 | Ptgs2     | 5.53E-12                       | 6.263341608                           | 147               | 1.492             | 0.5348     | Yes                 |
| ENSMUSG00000025746 | Il6       | 4.75E-13                       | 128.5313558                           | 155               | 1.382             | 0.5218     | No                  |
| ENSMUSG00000056054 | S100a8    | 1.33E-08                       | 22.40912127                           | 159               | 1.333             | 0.5212     | No                  |

List 4 continued

|                    |         |          |             |     |        |        |    |
|--------------------|---------|----------|-------------|-----|--------|--------|----|
| ENSMUSG0000056071  | S100a9  | 1.23E-07 | 15.03851638 | 161 | 1.32   | 0.5268 | No |
| ENSMUSG0000058427  | Cxcl2   | 5.98E-33 | 3289.780123 | 165 | 1.281  | 0.5259 | No |
| ENSMUSG0000053475  | Tnfrsf6 | 1.17E-05 | 4.947243573 | 171 | 1.214  | 0.5181 | No |
| ENSMUSG0000016529  | Il10    | 3.91E-08 | 129.1821376 | 176 | 1.156  | 0.5131 | No |
| ENSMUSG0000026984  | Il1f6   | 2.17E-05 | 135.1112892 | 183 | 1.065  | 0.5012 | No |
| ENSMUSG00000105504 | Gbp5    | 4.62E-06 | 18.73126225 | 199 | 0.919  | 0.4595 | No |
| ENSMUSG0000034855  | Cxcl10  | 5.60E-11 | 178.795138  | 202 | 0.852  | 0.4589 | No |
| ENSMUSG0000029417  | Cxcl9   | 5.53E-08 | 99.62982301 | 205 | 0.796  | 0.4579 | No |
| ENSMUSG0000060183  | Cxcl11  | 1.41E-05 | 1333.409081 | 207 | 0.715  | 0.4595 | No |
| ENSMUSG0000058914  | C1qtnf3 | 9.86E-07 | 0.040231638 | 289 | -2.207 | 0.2163 | No |
| ENSMUSG0000043496  | Tril    | 2.05E-22 | 0.123317141 | 310 | -2.481 | 0.1693 | No |
| ENSMUSG0000053647  | Gper1   | 8.88E-05 | 0.201738905 | 343 | -3.254 | 0.0892 | No |

44 genes were leading edge subset genes (blue)



**List 5. GSEA, inflammatory response related genes affected by DMOG**

| gene_id            | gene_name | padj (DMOG vs vehicle) | Fold-Change (DMOG vs vehicle) | Rank in gene list | Rank metric score | Running ES | Leading edge subset |
|--------------------|-----------|------------------------|-------------------------------|-------------------|-------------------|------------|---------------------|
| ENSMUSG00000043496 | Tril      | 1.52E-18               | 4.56183954                    | 16                | 3.197             | -0.0231    | No                  |
| ENSMUSG00000053647 | Gper1     | 0.000177658            | 4.596918178                   | 101               | 2.191             | -0.2716    | No                  |
| ENSMUSG00000058914 | C1qtnf3   | 0.005661761            | 11.04337                      | 150               | 1.274             | -0.4133    | No                  |
| ENSMUSG00000060183 | Cxcl1     | 0.00131531             | 0.045257974                   | 164               | -0.701            | -0.4486    | No                  |
| ENSMUSG00000029417 | Cxcl9     | 0.00626627             | 0.111104922                   | 165               | -0.706            | -0.4425    | No                  |
| ENSMUSG00000034855 | Cxcl10    | 2.95E-05               | 0.050853551                   | 171               | -0.809            | -0.4514    | No                  |
| ENSMUSG00000105504 | Gbp5      | 0.003314677            | 0.125942953                   | 178               | -0.835            | -0.4632    | No                  |
| ENSMUSG00000016529 | Il10      | 9.73E-06               | 0.105488266                   | 195               | -0.993            | -0.5055    | No                  |
| ENSMUSG00000056071 | S100a9    | 0.002521649            | 0.202527474                   | 199               | -1.054            | -0.5059    | No                  |
| ENSMUSG00000058427 | Cxcl2     | 0.0001281              | 0.083349823                   | 204               | -1.103            | -0.509     | No                  |
| ENSMUSG00000056054 | S100a8    | 8.75E-05               | 0.132725377                   | 211               | -1.17             | -0.518     | Yes                 |
| ENSMUSG00000026984 | Il1f6     | 0.000363903            | 0.013949402                   | 215               | -1.211            | -0.517     | Yes                 |
| ENSMUSG00000025746 | Il6       | 1.08E-05               | 0.082454048                   | 217               | -1.227            | -0.5095    | Yes                 |
| ENSMUSG00000037872 | Ackr1     | 9.90E-05               | 0.195025572                   | 220               | -1.249            | -0.505     | Yes                 |
| ENSMUSG00000042265 | Trem1     | 1.22E-09               | 0.193619862                   | 224               | -1.279            | -0.5034    | Yes                 |
| ENSMUSG00000051439 | Cd14      | 1.65E-05               | 0.143146627                   | 225               | -1.282            | -0.4922    | Yes                 |
| ENSMUSG00000053475 | Tnfaip6   | 1.85E-06               | 0.181123703                   | 226               | -1.296            | -0.4809    | Yes                 |
| ENSMUSG00000029379 | Cxcl3     | 9.13E-09               | 0.209041893                   | 228               | -1.318            | -0.4727    | Yes                 |
| ENSMUSG00000045551 | Fpr1      | 2.02E-11               | 0.16264979                    | 231               | -1.334            | -0.4674    | Yes                 |
| ENSMUSG00000026073 | Il1r2     | 2.96E-11               | 0.190130736                   | 233               | -1.337            | -0.459     | Yes                 |
| ENSMUSG00000035373 | Ccl7      | 1.19E-14               | 0.1001819                     | 236               | -1.344            | -0.4536    | Yes                 |
| ENSMUSG00000044701 | Il27      | 4.35E-06               | 0.131962006                   | 246               | -1.394            | -0.4702    | Yes                 |
| ENSMUSG00000032487 | Ptgs2     | 8.06E-10               | 0.22992373                    | 249               | -1.43             | -0.4641    | Yes                 |
| ENSMUSG00000058755 | Osm       | 3.61E-11               | 0.146757167                   | 252               | -1.452            | -0.4578    | Yes                 |
| ENSMUSG00000000982 | Ccl3      | 6.83E-07               | 0.109129139                   | 259               | -1.52             | -0.4637    | Yes                 |
| ENSMUSG00000044103 | Il1f9     | 3.02E-05               | 0.153107071                   | 260               | -1.523            | -0.4504    | Yes                 |
| ENSMUSG00000074115 | Saa1      | 0.003050162            | 0.206878911                   | 268               | -1.624            | -0.4586    | Yes                 |
| ENSMUSG00000029371 | Cxcl5     | 2.00E-16               | 0.135063534                   | 269               | -1.649            | -0.4442    | Yes                 |
| ENSMUSG00000018930 | Ccl4      | 4.73E-26               | 0.059414395                   | 276               | -1.741            | -0.4482    | Yes                 |
| ENSMUSG00000035352 | Ccl12     | 2.46E-08               | 0.221482926                   | 284               | -1.899            | -0.4539    | Yes                 |
| ENSMUSG00000027398 | Il1b      | 1.67E-24               | 0.117804928                   | 285               | -1.9              | -0.4374    | Yes                 |
| ENSMUSG00000026177 | Sle11a1   | 2.63E-13               | 0.232333606                   | 286               | -1.902            | -0.4208    | Yes                 |
| ENSMUSG00000036931 | Nfkbid    | 1.30E-11               | 0.218189854                   | 287               | -1.906            | -0.4042    | Yes                 |
| ENSMUSG00000029380 | Cxcl1     | 2.36E-15               | 0.095824333                   | 288               | -1.907            | -0.3876    | Yes                 |
| ENSMUSG00000027399 | Il1a      | 1.39E-24               | 0.090170443                   | 294               | -1.986            | -0.3863    | Yes                 |
| ENSMUSG00000020826 | Nos2      | 5.29E-26               | 0.06849956                    | 300               | -2.067            | -0.3842    | Yes                 |
| ENSMUSG00000032691 | Nlrp3     | 4.61E-16               | 0.203978559                   | 303               | -2.094            | -0.3723    | Yes                 |
| ENSMUSG00000053338 | Tarm1     | 3.85E-22               | 0.12474645                    | 309               | -2.182            | -0.3693    | Yes                 |
| ENSMUSG00000019850 | Tnfaip3   | 2.49E-17               | 0.213885176                   | 318               | -2.452            | -0.3734    | Yes                 |
| ENSMUSG00000026981 | Il1m      | 2.87E-15               | 0.174795811                   | 321               | -2.472            | -0.3583    | Yes                 |
| ENSMUSG00000024401 | Tnf       | 3.58E-27               | 0.081748552                   | 323               | -2.488            | -0.3398    | Yes                 |
| ENSMUSG00000057465 | Saa2      | 3.45E-06               | 0.159881304                   | 324               | -2.495            | -0.3181    | Yes                 |
| ENSMUSG00000004814 | Ccl24     | 7.33E-06               | 0.212934934                   | 327               | -2.528            | -0.3024    | Yes                 |

List 5 continued

|                    |          |          |             |     |        |         |     |
|--------------------|----------|----------|-------------|-----|--------|---------|-----|
| ENSMUSG00000052270 | Fpr2     | 1.55E-20 | 0.160780849 | 331 | -2.639 | -0.289  | Yes |
| ENSMUSG00000079700 | Fpr3     | 1.03E-08 | 0.050711158 | 334 | -2.737 | -0.2716 | Yes |
| ENSMUSG00000022534 | Mefv     | 4.08E-22 | 0.215845775 | 336 | -2.768 | -0.2506 | Yes |
| ENSMUSG00000023913 | Pla2g7   | 2.32E-26 | 0.225761091 | 337 | -2.802 | -0.2262 | Yes |
| ENSMUSG00000028599 | Tnfrsf1b | 1.65E-24 | 0.236599915 | 338 | -2.806 | -0.2018 | Yes |
| ENSMUSG00000026580 | Selp     | 1.18E-20 | 0.214382646 | 340 | -2.883 | -0.1799 | Yes |
| ENSMUSG00000001131 | Timp1    | 6.55E-18 | 0.208331927 | 341 | -2.918 | -0.1545 | Yes |
| ENSMUSG00000025383 | Il23a    | 4.65E-11 | 0.144711817 | 346 | -3.116 | -0.1401 | Yes |
| ENSMUSG00000021322 | Aoah     | 6.36E-37 | 0.230843126 | 350 | -3.128 | -0.1224 | Yes |
| ENSMUSG00000029082 | Bst1     | 2.24E-35 | 0.227576107 | 352 | -3.149 | -0.0982 | Yes |
| ENSMUSG00000039196 | Orm1     | 1.43E-25 | 0.224216958 | 353 | -3.172 | -0.0706 | Yes |
| ENSMUSG00000040026 | Saa3     | 3.92E-22 | 0.172660624 | 356 | -3.216 | -0.049  | Yes |
| ENSMUSG00000035385 | Ccl2     | 5.44E-35 | 0.109975304 | 358 | -3.255 | -0.0238 | Yes |
| ENSMUSG00000056529 | Ptafr    | 1.33E-28 | 0.191338705 | 362 | -3.321 | -0.0045 | Yes |
| ENSMUSG00000043953 | Ccr12    | 2.72E-36 | 0.18513749  | 365 | -3.44  | 0.0191  | Yes |

48 genes were leading edge subset genes (in color), and 4 genes were not involved in leading edge subset genes of List 4 (red).
